# Supplementary material
Source: publisher figshare collection journal article supplement (https://rs.figshare.com/ndownloader/files/23589412)
Supplement: Supplementary file 1 [file 23589412]

## Sheet: Metadata
	Table S2. Climatic data for each species.
	Species are arranged into each of the four groups (amphibians, squamates, birds, mammals), with one group per sheet.
	Within groups, they are arranged alphabetically by family name, and alphabetically within families by genus and species names.
	Variables are: annual mean temperature (Bio1), maximum annual temperature (Bio5), and minimum annual temperature (Bio6).

## Sheet: Amphibians
Species	Species name in tree	Family	Bio1	Bio5	Bio6
Ambystoma cingulatum	Ambystoma cingulatum	Ambystomatidae	19.2312	33.0328	3.78561
Ambystoma dumerilii	Ambystoma dumerilii	Ambystomatidae	16.2429	28.2143	4.25714
Ambystoma jeffersonianum	Ambystoma jeffersonianum	Ambystomatidae	9.40548	28.0134	-8.95296
Ambystoma macrodactylum	Ambystoma macrodactylum	Ambystomatidae	3.89629	22.1418	-11.1143
Ambystoma maculatum	Ambystoma maculatum	Ambystomatidae	8.72226	27.5804	-10.8552
Ambystoma mexicanum	Ambystoma mexicanum	Ambystomatidae	12.2857	22.8443	0.567956
Ambystoma opacum	Ambystoma opacum	Ambystomatidae	14.7498	31.5272	-2.6618
Ambystoma ordinarium	Ambystoma ordinarium	Ambystomatidae	17.5678	28.7806	6.36127
Ambystoma tigrinum	Ambystoma tigrinum	Ambystomatidae	10.7078	30.5348	-8.63727
Bufo alvarius	Bufo alvarius	Bufonidae	20.0676	37.1103	3.43157
Bufo boreas	Bufo boreas	Bufonidae	4.44564	23.8892	-11.924
Bufo canaliferus	Bufo canaliferus	Bufonidae	25.5291	33.3177	17.6193
Bufo canorus	Bufo canorus	Bufonidae	4.50349	21.434	-7.93443
Bufo cocifer	Bufo coccifer	Bufonidae	24.9143	32.4575	17.8215
Bufo cognatus	Bufo cognatus	Bufonidae	12.1282	32.1722	-7.51548
Bufo debilis	Bufo debilis	Bufonidae	17.2605	33.7273	-0.145891
Bufo exsul	Bufo exsul	Bufonidae	7.93461	27.8812	-8.27672
Bufo haemititicus	Bufo haematiticus	Bufonidae	25.1142	30.8124	19.8288
Bufo leutkeni	Bufo luetkenii	Bufonidae	24.8307	32.8648	17.3164
Bufo marinus	Bufo marinus	Bufonidae	24.4548	33.4726	14.614
Bufo marmoreus	Bufo marmoreus	Bufonidae	25.3473	32.8105	17.7241
Bufo mazatlanensis	Bufo mazatlanensis	Bufonidae	24.0346	34.4384	11.6435
Bufo nelsoni	Bufo nelsoni	Bufonidae	15.6794	37.0176	-2.88539
Bufo woodhousii fowleri	Bufo woodhousii	Bufonidae	11.4355	31.8042	-8.0143
Platymantis corrugatus	Platymantis corrugatus	Ceratobatrachidae	25.6536	31.5138	20.173
Platymantis dorsalis	Platymantis dorsalis	Ceratobatrachidae	26.4172	32.0812	21.4595
Craugastor fitzingeri	Craugastor fitzingeri	Craugastoridae	17.5364	23.4915	11.9121
Craugastor fleischmanni	Craugastor fleischmanni	Craugastoridae	25.5189	31.4139	20.2713
Dendrobates auratus	Dendrobates auratus	Dendrobatidae	13.1455	27.4243	2.29383
Dicamptodon ensatus	Dicamptodon ensatus	Dicamptodontidae	25.2441	31.4537	19.2543
Limnonectes woodworthi	Limnonectes woodworthi	Dicroglossidae	25.7473	31.3179	20.5846
Occidozyga laevis	Occidozyga laevis	Dicroglossidae	18.3948	31.1438	4.41532
Paa spinosa	Paa spinosa	Dicroglossidae	24.3116	30.828	17.0335
Eleutherodactylus coqui	Eleutherodactylus coqui	Eleutherodactylidae	22.7605	29.1789	15.6018
Eleutherodactylus portoricensus	Eleutherodactylus portoricensis	Eleutherodactylidae	14.168	32.1847	-4.5031
Acris crepitans	Acris crepitans	Hylidae	22.5701	34.1998	8.80822
Cyclorana alboguttatus	Cyclorana alboguttata	Hylidae	20.4265	33.2261	5.63057
Cyclorana brevipes	Cyclorana brevipes	Hylidae	12.6237	18.3594	6.73352
Dendropsophus labialis	Dendropsophus labialis	Hylidae	26.0639	32.5646	19.8833
Hyla chrysocelis	Hyla chrysoscelis	Hylidae	11.0927	29.7426	-8.34233
Hyla cinerea	Hyla cinerea	Hylidae	18.015	33.2305	1.62427
Hyla gratiosa	Hyla gratiosa	Hylidae	17.9476	32.528	2.07174
Hyla squirella	Hyla squirella	Hylidae	20.4284	30.515	7.96854
Hyla walkeri	Hyla walkeri	Hylidae	16.7094	27.5623	4.47526
Litoria aurea	Litoria aurea	Hylidae	18.7039	32.9607	3.09696
Litoria bicolor	Litoria bicolor	Hylidae	19.8277	28.4366	10.9859
Litoria caerulea	Litoria caerulea	Hylidae	14.584	25.4213	3.76502
Litoria chloris	Litoria chloris	Hylidae	26.5103	35.9389	14.6687
Litoria citropa	Litoria citropa	Hylidae	23.2376	35.776	8.74262
Litoria ewingi	Litoria ewingii	Hylidae	18.8653	29.3007	6.26113
Litoria glauerti	Litoria fallax	Hylidae	13.8195	25.2911	2.6245
Litoria freycineti	Litoria freycineti	Hylidae	11.5043	23.0594	1.91142
Litoria gracilenta	Litoria gracilenta	Hylidae	18.0199	27.7336	6.51332
Litoria lesueuri	Litoria lesueurii	Hylidae	19.9253	31.3187	6.34026
Litoria peroni	Litoria peronii	Hylidae	22.0422	31.5381	10.3288
Hyla phyllochroa	Litoria phyllochroa	Hylidae	12.0691	24.8639	0.848585
Litoria rothi	Litoria rothii	Hylidae	17.58	31.3312	3.60066
Litoria rubella	Litoria rubella	Hylidae	25.561	35.3422	13.3234
Litoria verreauxi	Litoria verreauxii	Hylidae	23.4911	36.56	8.82045
Hyla lesueuri	Litoria wilcoxii	Hylidae	14.1941	25.9442	2.7528
Pachymedusa dacnicolor	Pachymedusa dacnicolor	Hylidae	23.984	37.3705	8.5614
Hyla bicolor	Phyllomedusa bicolor	Hylidae	15.1627	30.9139	2.35266
Pseudacris cadaverina	Pseudacris cadaverina	Hylidae	8.15284	27.1445	-6.4068
Pseudacris regilla	Pseudacris regilla	Hylidae	9.66734	28.6008	-8.70036
Pseudacris triseriata	Pseudacris triseriata	Hylidae	24.0631	33.0071	14.6549
Smilisca baudini	Smilisca baudinii	Hylidae	22.1477	35.5239	7.81017
Smilisca fodiens	Smilisca fodiens	Hylidae	25.2375	30.97	19.9467
Smiliscaa phaeota	Smilisca phaeota	Hylidae	22.7412	32.9729	11.7312
Tlalocohyla smithi	Tlalocohyla smithii	Hylidae	25.0117	31.0227	19.5321
Engystomops pustulosus	Engystomops pustulosus	Leptodactylidae	25.8559	32.7718	19.4694
Leptodactylus melanotus	Leptodactylus melanonotus	Leptodactylidae	24.9599	32.8873	16.7985
Leptodactylus pentadactylus	Leptodactylus pentadactylus	Leptodactylidae	25.7688	32.5603	19.0791
Gastrophyrne mazatlanensis	Gastrophryne olivacea	Microhylidae	17.8794	34.5765	0.11986
Hypophacus sp	Hypopachus variolosus	Microhylidae	23.6954	32.9771	13.8291
Adelotus brevis	Adelotus brevis	Myobatrachidae	18.4909	30.4267	4.7697
Crinia darlingtoni	Assa darlingtoni	Myobatrachidae	18.2812	28.6311	5.78942
Crinia parainsignifera	Crinia parinsignifera	Myobatrachidae	16.6672	30.6181	3.42359
Crinia signifera	Crinia signifera	Myobatrachidae	15.1855	27.9341	3.49603
Crinia victoriana	Geocrinia victoriana	Myobatrachidae	12.7235	25.4889	2.71602
Limnodynastes dorsalis	Limnodynastes dorsalis	Myobatrachidae	17.1238	31.2927	6.05492
Limnodynastes fletcheri	Limnodynastes fletcheri	Myobatrachidae	19.357	33.7949	4.4859
Limnodynastes peroni	Limnodynastes peronii	Myobatrachidae	17.1003	28.5539	5.27132
Limnodynastes Salmini	Limnodynastes Salmini	Myobatrachidae	17.9833	31.1412	4.04221
Limnodynastes tasmaniensis	Limnodynastes tasmaniensis	Myobatrachidae	18.5676	32.3975	4.75428
Myxophyes fasciolatus	Mixophyes fasciolatus	Myobatrachidae	18.7678	29.2253	6.13971
Neobatrachus pictus	Neobatrachus pictus	Myobatrachidae	16.1898	30.6214	4.55253
Philoria sphagnicola	Philoria sphagnicolus	Myobatrachidae	15.9779	26.625	3.69369
Pseudophryne bibroni	Pseudophryne bibronii	Myobatrachidae	15.8618	28.7799	3.64907
Aneides aeneus	Aneides aeneus	Plethodontidae	15.6261	31.6049	-1.13722
Aneides ferreus	Aneides ferreus	Plethodontidae	12.6093	29.6455	-4.88424
Aneides flavipunctatus	Aneides flavipunctatus	Plethodontidae	8.98924	23.39	-0.81681
Aneides hardii	Aneides hardii	Plethodontidae	11.2489	27.8061	-0.328305
Aneides lugubris	Aneides lugubris	Plethodontidae	13.1875	31.4374	-4.7489
Batrachoseps attenuatus	Batrachoseps attenuatus	Plethodontidae	14.1765	29.7969	2.08032
Batrachoseps nigriventris	Batrachoseps nigriventris	Plethodontidae	13.0401	28.3799	1.78929
Batrachoseps pacificus	Batrachoseps pacificus	Plethodontidae	14.4209	28.9159	2.6757
Batrachoseps wrighti	Batrachoseps wrighti	Plethodontidae	14.5909	22.661	6.53922
Bolitoglossa adspersa	Bolitoglossa adspersa	Plethodontidae	7.06353	23.5995	-3.79241
Bolitoglossa dunni	Bolitoglossa dunni	Plethodontidae	13.1734	19.1181	7.28592
Bolitoglossa engelhardti	Bolitoglossa engelhardti	Plethodontidae	21.5391	29.7093	14.1153
Bolitoglossa franklini	Bolitoglossa franklini	Plethodontidae	15.0924	22.5134	6.15308
Bolitoglossa hartwegi	Bolitoglossa hartwegi	Plethodontidae	17.5713	25.5792	8.37193
Bolitoglossa replendens	Bolitoglossa lincolni	Plethodontidae	15.327	23.5136	6.92134
Bolitoglossa mexicana	Bolitoglossa mexicana	Plethodontidae	23.7516	31.4773	16.1645
Bolitoglossa morio	Bolitoglossa morio	Plethodontidae	18.6521	25.9574	10.9779
Bolitoglossa occidentalis	Bolitoglossa occidentalis	Plethodontidae	22.27	30.7228	13.129
Bolitoglossa platydactyla	Bolitoglossa platydactyla	Plethodontidae	23.8117	32.9449	14.6172
Bolitoglossa rostrata	Bolitoglossa rostrata	Plethodontidae	14.3228	22.4785	5.53453
Bolitoglossa rufescens	Bolitoglossa rufescens	Plethodontidae	12.5507	20.2507	3.78917
Bolitoglossa subpalmata	Bolitoglossa subpalmata	Plethodontidae	24.0846	32.077	16.1562
Chiropterotriton Chondrostega	Chiropterotriton Chondrostega	Plethodontidae	18.4812	24.563	12.8441
Chiropterotriton dimidiata	Chiropterotriton dimidiatus	Plethodontidae	18.2004	28.874	6.87878
Chiropterotriton lavae	Chiropterotriton lavae	Plethodontidae	13.1788	23.2212	3.07377
Chiropterotriton multidentata	Chiropterotriton multidentatus	Plethodontidae	15.3861	24.1078	6.4974
Desmognathus fuscus	Desmognathus fuscus	Plethodontidae	19.2261	30.5251	7.02129
Desmognathus monticola	Desmognathus monticola	Plethodontidae	11.8459	29.4048	-6.09146
Desmognathus ochrophaeus	Desmognathus ochrophaeus	Plethodontidae	12.7169	29.6166	-4.59821
Desmognathus quadramaculatus	Desmognathus quadramaculatus	Plethodontidae	8.62	27.0762	-9.48972
Desmognathus wrighti	Desmognathus wrighti	Plethodontidae	12.4753	28.944	-4.4643
Ensatina eschscholtzii	Ensatina eschscholtzii	Plethodontidae	11.9788	28.2042	-4.82689
Eurycea bislineata	Eurycea bislineata	Plethodontidae	12.7936	29.232	-4.06314
Eurycea longicauda	Eurycea longicauda	Plethodontidae	11.0297	26.8886	-0.401285
Eurycea lucifuga	Eurycea lucifuga	Plethodontidae	4.92613	24.8856	-15.7475
Eurycea multiplicata	Eurycea multiplicata	Plethodontidae	11.715	29.8759	-6.63553
Eurycea nana	Eurycea nana	Plethodontidae	13.1491	31.03	-5.28883
Typhlomolge rathbuni	Eurycea rathbuni	Plethodontidae	14.8404	33.0169	-4.06657
Ensatina b. wilderae	Eurycea wilderae	Plethodontidae	19.8403	35.3537	3.05224
Gyrinophilus palleucus	Gyrinophilus palleucus	Plethodontidae	14.4994	31.3052	-2.85574
Gyrinophilus porphyriticus	Gyrinophilus porphyriticus	Plethodontidae	9.91071	28.1194	-8.41046
Hydromantes brunus	Hydromantes brunus	Plethodontidae	14.6535	34.7686	0.400555
Hydromantes platycephalus	Hydromantes platycephalus	Plethodontidae	9.51382	28.2397	-4.8543
Hydromantes shastae	Hydromantes shastae	Plethodontidae	14.0989	34.3117	-0.150879
Lineatriton lineola	Lineatriton lineolus	Plethodontidae	19.3269	27.9278	10.5178
Parvimolge townsendi	Parvimolge townsendi	Plethodontidae	18.446	27.0581	9.61144
Plethodon caddoensis	Plethodon caddoensis	Plethodontidae	15.0638	32.5175	-3.00083
Plethodon cinereus	Plethodon cinereus	Plethodontidae	6.39316	25.9752	-13.6077
Plethodon dorsalis	Plethodon dorsalis	Plethodontidae	13.8927	31.1382	-3.9772
Plethodon dunni	Plethodon dunni	Plethodontidae	9.28461	24.0711	-0.701301
Plethodon glutinosus	Plethodon glutinosus	Plethodontidae	13.9171	30.6507	-3.34536
Plethodon metcalfi	Plethodon metcalfi	Plethodontidae	13.2856	29.2698	-3.24528
Plethodon neomexicanus	Plethodon neomexicanus	Plethodontidae	7.2475	27.0116	-10.8094
Plethodon ouachitae	Plethodon ouachitae	Plethodontidae	15.2587	32.7911	-2.88699
Plethodon vandykei	Plethodon vandykei	Plethodontidae	7.88803	21.7037	-1.61011
Plethodon vechiculum	Plethodon vehiculum	Plethodontidae	7.89168	21.5961	-1.86116
Plethodon welleri	Plethodon welleri	Plethodontidae	10.6361	26.5886	-5.95727
Pseudoeurycea bellii	Pseudoeurycea bellii	Plethodontidae	17.7333	29.4495	5.47086
Pseudoeurycea brunnata	Pseudoeurycea brunnata	Plethodontidae	12.3092	19.7619	2.91527
Pseudoeurycea cephalica	Pseudoeurycea cephalica	Plethodontidae	15.6752	26.378	4.3203
Pseudoeurycea cochranae	Pseudoeurycea cochranae	Plethodontidae	16.6252	26.8916	6.02704
Pseudoeurycea gaebeli	Pseudoeurycea goebeli	Plethodontidae	14.1593	22.088	4.74588
Pseudoeurycea leprosa	Pseudoeurycea leprosa	Plethodontidae	13.2414	23.5324	2.35302
Pseudoeurycea nigromaculata	Pseudoeurycea nigromaculata	Plethodontidae	20.928	29.6013	12.0945
Pseudoeurycea rex	Pseudoeurycea rex	Plethodontidae	13.6327	21.5343	4.66221
Pseudoeurycea robertsi	Pseudoeurycea robertsi	Plethodontidae	9.81778	18.98	0.198889
Pseudoeurycea smithi	Pseudoeurycea smithi	Plethodontidae	13.0851	22.6549	4.04062
Pseudoeurycea unguidentis	Pseudoeurycea unguidentis	Plethodontidae	12.3305	21.8244	3.50333
Pseudotriton ruber	Pseudotriton ruber	Plethodontidae	13.4893	30.3866	-3.80439
Thorius dubitus	Thorius dubitus	Plethodontidae	14.606	25.1369	3.92194
Thorius troglodytes	Thorius troglodytes	Plethodontidae	13.5408	23.8712	3.08612
Pseudoeurycea altamontana	Pseudoeurycea altamontana	Plethodontidae	19.6237	35.0607	2.84631
Rana boylli	Rana boylii	Ranidae	12.9437	23.1443	1.76971
Rana cascadae	Rana cascadae	Ranidae	25.5943	32.8786	17.6334
Rana catesbeiana	Rana catesbeiana	Ranidae	23.8457	30.1349	17.4958
Rana clamitans	Rana clamitans	Ranidae	10.8967	28.0167	-1.18782
Hylarana erythraea	Rana erythraea	Ranidae	6.97355	24.2425	-5.00891
Hylarana luzonensis	Rana luzonensis	Ranidae	12.4992	30.3367	-4.67911
Rana palmipes	Rana palmipes	Ranidae	9.8604	28.4024	-9.38179
Rana palustris	Rana palustris	Ranidae	25.8608	32.601	19.3922
Rana pipiens	Rana pipiens	Ranidae	10.6172	28.8851	-7.95461
Rana pretiosa	Rana pretiosa	Ranidae	4.69814	26.4436	-16.8666
Rana sylvaticus	Rana sylvatica	Ranidae	7.85041	25.3306	-4.02424
Rana virgatipes	Rana virgatipes	Ranidae	-1.29947	21.1411	-24.0271
Rana warszewitschii	Rana warszewitschii	Ranidae	16.7306	32.0811	0.40161
Philautus surdus	Philautus surdus	Rhacophoridae	24.7297	30.865	19.0697
Rhyacotriton olympicus	Rhyacotriton olympicus	Rhyacotritonidae	25.456	31.3657	19.8239
Notophthalmus viridescens	Notophthalmus viridescens	Salamandridae	8.52803	21.1781	-0.331194
Salamandra salamandra	Salamandra salamandra	Salamandridae	10.3936	28.6524	-8.57962
Taricha granulosa	Taricha granulosa	Salamandridae	10.0527	24.5186	-2.02492
Taricha torosa	Taricha torosa	Salamandridae	6.95366	20.8157	-3.47451
Spea holbrooki	Scaphiopus holbrookii	Scaphiopodidae	13.8203	28.7378	2.09347
Spea hammondi	Spea hammondii	Scaphiopodidae	15.4278	32.2835	2.27731
Pseudobranchus striatus	Pseudobranchus striatus	Sirenidae	19.2822	32.9542	3.90428

## Sheet: Squamates
Species	Species name in tree	Family	Bio1	Bio5	Bio6
Agama agama	Agama agama	Agamidae	24.4764	32.5167	16.7915
Agama hispida	Agama hispida	Agamidae	16.65	30.5	2.93
Amphibolurus muricatus	Amphibolurus muricatus	Agamidae	14.5481	26.5673	3.0351
Calotes versicolor	Calotes versicolor	Agamidae	24.7458	32.7856	15.5549
Chlamydosaurus kingii	Chlamydosaurus kingii	Agamidae	25.57	35.6	13.1
Ctenophorus caudicinctus	Ctenophorus caudicinctus	Agamidae	24.0324	37.8519	8.48617
Ctenophorus cristatus	Ctenophorus cristatus	Agamidae	17.7751	32.4458	5.01453
Ctenophorus decresii	Ctenophorus decresii	Agamidae	15.437	29.8833	3.63267
Ctenophorus fordi	Ctenophorus fordi	Agamidae	17.5035	32.77	4.50905
Ctenophorus isolepis	Ctenophorus isolepis	Agamidae	23.2323	37.5069	7.36353
Amphibolurus maculatus	Ctenophorus maculatus	Agamidae	18.856	32.5085	7.32651
Ctenophorus maculosus	Ctenophorus maculosus	Agamidae	20.53	36.49	4.86
Amphibolurus reticulatus	Ctenophorus nuchalis	Agamidae	22.73	37.46	6.98
Ctenophorus pictus	Ctenophorus pictus	Agamidae	18.6698	33.546	5.18435
Ctenophorus reticulatus	Ctenophorus reticulatus	Agamidae	21.1806	36.3459	7.06642
Ctenophorus scutulatus	Ctenophorus scutulatus	Agamidae	20.1883	35.8145	6.37095
Draco volans	Draco volans	Agamidae	25.2031	30.6585	19.5739
Hypsilurus spinipes	Hypsilurus spinipes	Agamidae	16.3988	26.5085	4.80386
Lophognathus gilberti	Lophognathus gilberti	Agamidae	24.72	38.07	8.6
Lophognathus longirostris	Lophognathus longirostris	Agamidae	21.7392	36.8545	4.69819
Moloch horridus	Moloch horridus	Agamidae	20.1489	35.015	5.67418
Phrynocephalus helioscopus	Phrynocephalus helioscopus	Agamidae	5.56	28.86	-16.75
Phrynocephalus interscapularis	Phrynocephalus interscapularis	Agamidae	16.081	37.819	-2.54762
Phrynocephalus mystaceus	Phrynocephalus mystaceus	Agamidae	14.5886	35.5386	-4.8
Pogona barbata	Pogona barbata	Agamidae	17.24	29.99	4.54
Rankinia diemensis	Rankinia diemensis	Agamidae	12.74	25.32	1.48
Laudakia stellio	Stellagama stellio	Agamidae	14.96	32.51	0.09
Trapelus sanguinolentus	Trapelus sanguinolentus	Agamidae	14.6742	36.5022	-4.71292
Trapelus savignii	Trapelus savignii	Agamidae	19.88	32.65	7.29
Uromastyx ornata	Uromastyx ornata	Agamidae	22.7673	36.9782	8.76337
Amphisbaena mertensi	Amphisbaena mertensii	Amphisbaenidae	22.0938	30.8687	11.5687
Anguis fragilis	Anguis fragilis	Anguidae	8.69737	21.714	-2.12639
Elgaria coerulea	Elgaria coerulea	Anguidae	6.49	23.82	-6.26
Elgaria multicarinata	Elgaria multicarinata	Anguidae	12.61	29.72	0.04
Ophisaurus attenuatus	Ophisaurus attenuatus	Anguidae	16.07	32.8	-1.63
Anniella pulchra	Anniella pulchra	Annielliidae	15.35	31.92	2.1
Blanus cinerus	Blanus cinereus	Blanidae	14.3	30.52	2.43
Charina bottae	Charina bottae	Boidae	6.22	26.69	-9.24
Nephrurus laevissimus	Nephrurus laevissimus	Carphodactylidae	20.4436	35.766	4.93748
Nephrurus levis	Nephrurus levis	Carphodactylidae	23.09	37.9	6.94
Nephurus stellatus	Nephrurus stellatus	Carphodactylidae	17.11	30.18	5.53
Nephrurus vertebralis	Nephrurus vertebralis	Carphodactylidae	20.4841	36.6927	5.36377
Nephrurus milii	Underwoodisaurus milii	Carphodactylidae	17.2995	31.1758	4.78665
Bradypodion pumilum	Bradypodion pumilum	Chamaeleonidae	16.1272	26.0109	7.05
Chamaeleo africanus	Chamaeleo africanus	Chamaeleonidae	26.14	39.13	11.79
Chamaeleo calyptratus	Chamaeleo calyptratus	Chamaeleonidae	21.24	32.68	9.24
Chamaeleo chamaeleo	Chamaeleo chamaeleon	Chamaeleonidae	18.24	33.48	4.89
Chamaeleo dilepis	Chamaeleo dilepis	Chamaeleonidae	22.66	31.69	12.47
Chamaeleo namaquensis	Chamaeleo namaquensis	Chamaeleonidae	18.74	30.36	5.61
Chionactis occipitalis	Chionactis occipitalis	Chamaeleonidae	18.42	37.78	1.42
Furcifer pardalis	Furcifer pardalis	Chamaeleonidae	23.89	30.4	16.78
Chamaeleo bitaeniatus	Trioceros bitaeniatus	Chamaeleonidae	22.42	31.36	14.63
Chamaeleo ellioti	Trioceros ellioti	Chamaeleonidae	19.63	26.86	12.8
Chamaeleo hoehnelii	Trioceros hoehnelii	Chamaeleonidae	16.94	26.39	8.51
Chamaeleo jacksonii	Trioceros jacksonii	Chamaeleonidae	17.51	26.77	9.19
Trioceros schubotzi	Trioceros schubotzi	Chamaeleonidae	10.18	18.58	2.98
Arizona elegans	Arizona elegans	Colubridae	17.29	34.68	-0.12
Carphophis amoenus	Carphophis amoenus	Colubridae	13.97	30.89	-3.44
Coluber constrictor	Coluber constrictor	Colubridae	20.77	32.16	8.04
Masticophis flagellum	Coluber flagellum	Colubridae	18.0073	34.7564	1.23081
Contia tenuis	Contia tenuis	Colubridae	11.2	28.44	-0.86
Diadophis punctatus	Diadophis punctatus	Colubridae	12.62	30.52	-5.39
Hypsiglena torquata	Hypsiglena torquata	Colubridae	15.04	33.24	-1.87
Lampropeltis doliata	Lampropeltis elapsoides	Colubridae	20.2058	32.481	6.12129
Lampropeltis getulus	Lampropeltis getula	Colubridae	16.12	33.28	-1.02
Lampropeltis zonata	Lampropeltis zonata	Colubridae	11.48	29.18	-1.24
Natrix erythrogaster	Nerodia erythrogaster	Colubridae	16.82	33.53	-0.9
Natrix rhombifera	Nerodia rhombifer	Colubridae	17.72	34.02	0.34
Natrix sipedon	Nerodia sipedon	Colubridae	10.94	29.8	-8.25
Elaphe obsoleta	Pantherophis obsoletus	Colubridae	14.32	31.59	-3.59
Pituophis catenifer	Pituophis catenifer	Colubridae	11.78	31.58	-6.64
Regina alleni	Regina alleni	Colubridae	21.42	32.89	7.95
Rhinocheilus lecontei	Rhinocheilus lecontei	Colubridae	17.18	34.39	0.25
Storeria occipitomaculata	Storeria occipitomaculata	Colubridae	9.53	28.48	-10.16
Thamnophis butleri	Thamnophis butleri	Colubridae	8.9	28.24	-9.7
Thamnophis elegans	Thamnophis elegans	Colubridae	6.39	27.2	-10.88
Thamnophis marcianus	Thamnophis marcianus	Colubridae	19.63	34.33	3.83
Thamnophis melanogaster	Thamnophis melanogaster	Colubridae	17.51	30.22	4.01
Thamnophis ordinoides	Thamnophis ordinoides	Colubridae	8.21	22.43	-1.7
Thamnophis radix	Thamnophis radix	Colubridae	6.48	28.83	-16.04
Thamnophis sauritus	Thamnophis sauritus	Colubridae	12.97	29.91	-4.28
Thamnophis sirtalis	Thamnophis sirtalis	Colubridae	6.61	26.71	-13.65
Tropidoclonion lineatum	Tropidoclonion lineatum	Colubridae	14.01	33.21	-5.76
Cordylus cordylus	Cordylus cordylus	Cordylidae	15.5097	26.4249	4.49676
Cordylus jonesii	Cordylus jonesii	Cordylidae	20.5443	30.8795	6.05738
Cordylus macropholis	Cordylus macropholis	Cordylidae	16.5	25.25	7.71667
Cordylus niger	Cordylus niger	Cordylidae	28.4078	40.5633	14.5992
Cordylus oelofseni	Cordylus oelofseni	Cordylidae	13.9875	26.3	3.625
Cordylus vittifer	Cordylus vittifer	Cordylidae	17.2165	27.1897	3.28063
Cordylus polyzonus	Karusasaurus polyzonus	Cordylidae	16.8268	29.9087	3.62542
Cordylus cataphractus	Ouroborus cataphractus	Cordylidae	16.8861	28.5639	5.44722
Platysaurus intermedius	Platysaurus intermedius	Cordylidae	20.18	30.57	6.51
Pseudocordylus melanotus	Pseudocordylus melanotus	Cordylidae	14.359	24.0686	1.08397
Basiliscus basiliscus	Basiliscus basiliscus	Corytophanidae	25.3	31.37	19.56
Basiliscus plumifrons	Basiliscus plumifrons	Corytophanidae	25.42	31.36	19.82
Basiliscus vittatus	Basiliscus vittatus	Corytophanidae	25.12	33.11	16.88
Crotaphytus collaris	Crotaphytus collaris	Crotaphytidae	15	33.3	-3.56
Gambelia sila	Gambelia sila	Crotaphytidae	16.01	35.14	1.42
Crotaphytus wislizeni	Gambelia wislizenii	Crotaphytidae	13.61	33.48	-3.84
Anolis allisoni	Anolis allisoni	Dactyloidae	25.325	32.9	16.79
Anolis allogus	Anolis allogus	Dactyloidae	25.07	32.54	16.88
Anolis auratus	Anolis auratus	Dactyloidae	26.2228	32.4564	20.5888
Anolis bahorucoensis	Anolis bahorucoensis	Dactyloidae	20.356	27.532	12.076
Anolis barbatus	Anolis barbatus	Dactyloidae	23.4333	31.1	15.1333
Anolis barbouri	Anolis barbouri	Dactyloidae	21.11	27.995	13.205
Anolis bonairensis	Anolis bonairensis	Dactyloidae	27.2333	30.85	23.6
Anolis capito	Anolis capito	Dactyloidae	24.0191	30.6956	17.7878
Anolis carolinensis	Anolis carolinensis	Dactyloidae	18.13	33.17	1.87
Anolis chrysolepis	Anolis chrysolepis	Dactyloidae	25.166	31.498	19.5847
Anolis cooki	Anolis cooki	Dactyloidae	26.0571	32.7	18.4143
Anolis cristatellus	Anolis cristatellus	Dactyloidae	24.6263	30.9234	17.5976
Anolis cupreus	Anolis cupreus	Dactyloidae	24.1528	31.6453	17.366
Anolis cybotes	Anolis cybotes	Dactyloidae	23.309	30.3667	15.5382
Anolis distichus	Anolis distichus	Dactyloidae	23.8963	30.9339	16.1921
Anolis equestris	Anolis equestris	Dactyloidae	24.3783	31.613	16.4826
Anolis evermanni	Anolis evermanni	Dactyloidae	22.7133	28.9375	15.8297
Anolis frenatus	Anolis frenatus	Dactyloidae	24.9344	30.3607	19.8443
Anolis fuscoauratus	Anolis fuscoauratus	Dactyloidae	24.6316	30.817	18.5913
Anolis gingivinus	Anolis gingivinus	Dactyloidae	27.0667	31.3667	22.4667
Anolis grahami	Anolis grahami	Dactyloidae	24.03	29.21	18.79
Anolis gundlachi	Anolis gundlachi	Dactyloidae	22.1961	28.4423	15.3308
Anolis homolechis	Anolis homolechis	Dactyloidae	24.3978	31.4587	16.637
Anolis humilis	Anolis humilis	Dactyloidae	23.4688	29.6149	17.9168
Anolis intermedius	Anolis intermedius	Dactyloidae	19.265	25.545	13.455
Anolis krugi	Anolis krugi	Dactyloidae	23.1181	29.4614	16.0865
Anolis lemurinus	Anolis lemurinus	Dactyloidae	24.8217	32.2504	17.3697
Anolis limifrons	Anolis limifrons	Dactyloidae	24.312	30.6877	18.4222
Anolis lineatopis	Anolis lineatopus	Dactyloidae	24.8812	30.1522	19.5551
Anolis lionotus	Anolis lionotus	Dactyloidae	26.06	32.67	20.59
Anolis longiceps	Anolis longiceps	Dactyloidae	26.4	31.8	20.6
Anolis longitibialis	Anolis longitibialis	Dactyloidae	26.08	33.08	18.8
Anolis lucius	Anolis lucius	Dactyloidae	24.465	31.975	16.155
Anolis marcanoi	Anolis marcanoi	Dactyloidae	24.1692	31	16.7846
Anolis marmoratus	Anolis marmoratus	Dactyloidae	24.8373	29.822	19.0288
Anolis monensis	Anolis monensis	Dactyloidae	25.6	31.5	19.15
Anolis occulatus	Anolis occultus	Dactyloidae	22.73	29.18	15.55
Anolis oculatus	Anolis oculatus	Dactyloidae	23.9	28.85	18.45
Anolis olssoni	Anolis olssoni	Dactyloidae	25.13	32.45	17.14
Anolis polylepis	Anolis polylepis	Dactyloidae	23.2676	30.4196	16.9331
Anolis pulchellus	Anolis pulchellus	Dactyloidae	24.8783	31.0293	18.0283
Anolis punctatus	Anolis punctatus	Dactyloidae	25.112	31.3427	18.9103
Anolis roquet	Anolis roquet	Dactyloidae	25.854	30.4832	20.8562
Anolis sagrei	Anolis sagrei	Dactyloidae	24.7837	31.9721	16.8988
Anolis semilineatus	Anolis semilineatus	Dactyloidae	23.94	31.04	16.16
Anolis shrevei	Anolis shrevei	Dactyloidae	12.7433	20.2667	4.30667
Anolis stratulus	Anolis stratulus	Dactyloidae	24.4396	30.6112	17.5861
Anolis trachyderma	Anolis trachyderma	Dactyloidae	25.1333	31.1133	19.2773
Anolis transversalis	Anolis transversalis	Dactyloidae	25.5667	31.4818	19.7848
Anolis tropidogaster	Anolis tropidogaster	Dactyloidae	25.9953	31.7813	20.7365
Anolis uniformis	Anolis uniformis	Dactyloidae	24.1474	31.8115	16.6401
Diplodactylus conspicillatus	Diplodactylus conspicillatus	Diplodactylidae	22.7859	37.0347	7.18763
Diplodactylus pulcher	Diplodactylus pulcher	Diplodactylidae	19.6058	35.2282	5.89264
Oedura reticulata	Hesperoedura reticulata	Diplodactylidae	17.4686	33.0392	5.07712
Hoplodactylus duvaucelii	Hoplodactylus duvaucelii	Diplodactylidae	14.8333	23.8333	6.56667
Lucasium stenodactylum	Lucasium stenodactylum	Diplodactylidae	22.9693	37.1546	7.49326
Naultinus manukanus	Naultinus manukanus	Diplodactylidae	9.28	19.16	0.25
Naultinus rudis	Naultinus rudis	Diplodactylidae	8.7	18.45	-0.25
Naultinus stellatus	Naultinus stellatus	Diplodactylidae	12.075	21.475	2.325
Oedura marmorata	Oedura marmorata	Diplodactylidae	23.1937	36.0053	9.00788
Opheodrys vernalis	Opheodrys vernalis	Diplodactylidae	6.9454	26.09	-12.0084
Rhynchoedura ornata	Rhynchoedura ornata	Diplodactylidae	21.5033	36.5988	5.86898
Strophurus ciliaris	Strophurus ciliaris	Diplodactylidae	23.93	37.51	8.46
Strophurus elderi	Strophurus elderi	Diplodactylidae	20.9606	36.0243	5.77591
Strophurus spinigerus	Strophurus spinigerus	Diplodactylidae	18.4104	31.8864	7.82802
Strophurus strophurus	Strophurus strophurus	Diplodactylidae	22.1	36.4934	8.3939
Hoplodactylus maculatus	Woodworthia maculatus	Diplodactylidae	12.1833	21.5091	3.87273
Austrelaps superbus	Austrelaps superbus	Elapidae	12.9427	24.4712	3.81359
Hemachatus haemachatus	Hemachatus haemachatus	Elapidae	16.11	27.47	2.65
Notechis scutatus	Notechis scutatus	Elapidae	13.3	24.43	4.73
Pseudechis porphyriacus	Pseudechis porphyriacus	Elapidae	15.993	27.2288	4.37602
Pseudonaja textilis	Pseudonaja textilis	Elapidae	16.4572	29.4541	4.16629
Coleonyx brevis	Coleonyx brevis	Eublepharidae	19.16	34.48	2.25
Coleonyx elegans	Coleonyx elegans	Eublepharidae	25.46	33.8	16.68
Coleonyx mitratus	Coleonyx mitratus	Eublepharidae	25.73	33.56	18.65
Coleonyx variegatus	Coleonyx variegatus	Eublepharidae	18.55	36.12	2.77
Eublepharis macularius	Eublepharis macularius	Eublepharidae	15.3222	33.3778	-2.78889
Goniurosaurus kuroiwae	Goniurosaurus kuroiwae	Eublepharidae	21.9	30.76	12.46
Hemitheconyx caudicinctus	Hemitheconyx caudicinctus	Eublepharidae	26.93	37.2	16.58
Chondrodactylus angulifer	Chondrodactylus angulifer	Gekkonidae	18.12	31.48	3.51
Chondrodactylus bibronii	Chondrodactylus bibronii	Gekkonidae	17.978	31.3227	3.68179
Christinus marmoratus	Christinus marmoratus	Gekkonidae	15.3853	28.7092	4.81753
Cyrtodactylus philippinicus	Cyrtodactylus philippinicus	Gekkonidae	25.47	31.57	19.62
Gehyra variegata	Gehyra variegata	Gekkonidae	20.1842	35.2816	5.5438
Hemidactylus frenatus	Hemidactylus frenatus	Gekkonidae	25.33	33.28	16.49
Hemidactylus mabouia	Hemidactylus mabouia	Gekkonidae	22.9351	31.0894	13.3916
Hemidactylus turcicus	Hemidactylus turcicus	Gekkonidae	17.27	31.87	4.39
Heteronotia binoei	Heteronotia binoei	Gekkonidae	22.3361	34.9729	8.66748
Lepidodactylus lugubris	Lepidodactylus lugubris	Gekkonidae	24.9293	30.2646	19.7575
Lygodactylus klugei	Lygodactylus klugei	Gekkonidae	24.55	31.925	17.6
Cyrtopodion kotschyi	Mediodactylus kotschyi	Gekkonidae	12.85	29.39	-0.86
Phelsuma madagascariensis	Phelsuma madagascariensis	Gekkonidae	21.99	29.27	14.19
Rhoptropus afer	Rhoptropus afer	Gekkonidae	18.7493	27.0211	9.16549
Gerrhosaurus major	Broadleysaurus major	Gerrhosauridae	22.7663	31.7379	11.5937
Gerrhosaurus flavigularis	Gerrhosaurus flavigularis	Gerrhosauridae	18.4885	28.5968	4.79246
Gerrhosaurus nigrolineatus	Gerrhosaurus nigrolineatus	Gerrhosauridae	22.1374	31.1081	10.8106
Gerrhosaurus skoogi	Gerrhosaurus skoogi	Gerrhosauridae	18.77	24.89	11.54
Alopoglossus angulatus	Alopoglossus angulatus	Gymnophthalmidae	25.97	32.43	19.79
Alopoglossus atriventris	Alopoglossus atriventris	Gymnophthalmidae	25.5371	31.34	19.9914
Cercosaura eigenmanni	Cercosaura eigenmanni	Gymnophthalmidae	25.7875	32.8125	18.3438
Micrablepharus maximiliani	Micrablepharus maximiliani	Gymnophthalmidae	25.0542	33.1375	16.3125
Potamites ecpleopus	Potamites ecpleopus	Gymnophthalmidae	23.8814	30.1227	17.6897
Potamites juruazensis	Potamites juruazensis	Gymnophthalmidae	25.45	32.3	17.85
Heloderma horridum	Heloderma horridum	Helodermatidae	24.32	34.98	12.51
Heloderma suspectum	Heloderma suspectum	Helodermatidae	18.75	36.7	1.9
Amblyrhynchus cristatus	Amblyrhynchus cristatus	Iguanidae	22.9803	29.6985	17.9985
Conolophus pallidus	Conolophus pallidus	Iguanidae	23.1	29.8667	18.1333
Conolophus subcristatus	Conolophus subcristatus	Iguanidae	22.9	29.6108	17.8676
Cyclura nubila	Cyclura nubila	Iguanidae	25.6204	32.402	18.2306
Dipsosaurus dorsalis	Dipsosaurus dorsalis	Iguanidae	19.84	37.17	3.88
Iguana iguana	Iguana iguana	Iguanidae	25.1953	32.508	17.4539
Sauromalus obesus	Sauromalus ater	Iguanidae	18.37	36.89	1.86
Acanthodactylus boskianus	Acanthodactylus boskianus	Lacertidae	20.7309	34.7023	7.07672
Acanthodactylus erythrurus	Acanthodactylus erythrurus	Lacertidae	14.76	31.28	2.1
Acanthodactylus paradis	Acanthodactylus pardalis	Lacertidae	19.16	30.75	6.67
Acanthodactylus schreiberi	Acanthodactylus schreiberi	Lacertidae	17.99	32.98	5.38
Acanthodactyus scutellatus	Acanthodactylus scutellatus	Lacertidae	21.9403	36.3649	6.93333
Archaeolacerta bedriagae	Archaeolacerta bedriagae	Lacertidae	12.64	24.78	3.48
Dalmatolacerta oxycephala	Dalmatolacerta oxycephala	Lacertidae	11.34	26.02	-0.69
Eremias prezwalskii	Eremias przewalskii	Lacertidae	4.31875	28.2188	-22.375
Gallottia galloti	Gallotia galloti	Lacertidae	15.27	24.96	8.17
Gallotia simonyi	Gallotia simonyi	Lacertidae	17.6	26.2	10.95
Heliobolus lugubris	Heliobolus lugubris	Lacertidae	20.6188	32.1309	5.67675
Heliobolus spekii	Heliobolus spekii	Lacertidae	24.1667	32.5074	16.0917
Iberolacerta monticola	Iberolacerta monticola	Lacertidae	10.12	23.15	0.4
Lacerta agilis	Lacerta agilis	Lacertidae	3.79	24.77	-16.29
Lacerta schreiberi	Lacerta schreiberi	Lacertidae	12.01	25.77	1.83
Lacerta viridis	Lacerta viridis	Lacertidae	10.13	26.38	-4.3
Latastia longicaudata	Latastia longicaudata	Lacertidae	23.8929	32.7738	15.4488
Meroles anchietae	Meroles anchietae	Lacertidae	18.5659	27.0716	9.27386
Meroles suborbitalis	Meroles suborbitalis	Lacertidae	18.1291	31.3034	3.93846
Nucrus tessallata	Nucras tessellata	Lacertidae	17.534	30.6123	4.05283
Eremias lineoocellata	Pedioplanis lineoocellata	Lacertidae	17.7046	30.6322	3.11198
Eremias namaquensis	Pedioplanis namaquensis	Lacertidae	18.682	31.449	4.40493
Podarcis bocagei	Podarcis bocagei	Lacertidae	11.52	24.28	1.87
Podarcis hispanicus	Podarcis hispanicus	Lacertidae	12.94	28.36	1.43
Podarcis lilfordi	Podarcis lilfordi	Lacertidae	16.59	28.48	6.8
Podarcis melisellensis	Podarcis melisellensis	Lacertidae	12.48	26.99	0.55
Podarcis milensis	Podarcis milensis	Lacertidae	18	28.6	8.9
Podarcis muralis	Podarcis muralis	Lacertidae	10.23	24.93	-2.18
Podarcis siculus	Podarcis siculus	Lacertidae	13.39	27.51	1.97
Podarcis tiliguerta	Podarcis tiliguerta	Lacertidae	14.31	27.1	4.72
Psammodromus algirus	Psammodromus algirus	Lacertidae	15.89	33.11	2.32
Psammodromus hispanicus	Psammodromus hispanicus	Lacertidae	13.84	29.83	1.94
Takydromus formosanus	Takydromus formosanus	Lacertidae	21.195	29.515	11.78
Takydromus hsuehshanensis	Takydromus hsuehshanensis	Lacertidae	7.9	14.5778	-1.34444
Takydromus septentrionalis	Takydromus septentrionalis	Lacertidae	18.1667	31.6733	4.72667
Takydromus sexlineatus	Takydromus sexlineatus	Lacertidae	24.52	31.98	15.86
Takydromus stejnegeri	Takydromus stejnegeri	Lacertidae	22.0154	30.7385	12.3192
Teira dugesii	Teira dugesii	Lacertidae	15.5	22.9	9.6
Zootoca vivipara	Zootoca vivipara	Lacertidae	0.06	22.28	-21.61
Eremias argus	Eremias argus	Lacertidae	10.4588	28.9471	-9.77059
Eremias brenchleyi	Eremias brenchleyi	Lacertidae	10	28.7	-11.9
Eremias multiocellata	Eremias multiocellata	Lacertidae	5.13125	27.0031	-19.1531
Lanthanotus borneensis	Lanthanotus borneensis	Lanthanotidae	25.95	30.9	21.45
Leiocephalus schreibersii	Leiocephalus schreibersii	Leiocephalidae	24.94	31.97	17.17
Pristidactylus torquatus	Pristidactylus torquatus	Leiosauridae	11.01	24.09	2.32
Liolaemus abaucan	Liolaemus abaucan	Liolaemidae	15.32	28.44	0
Liolaemus albiceps	Liolaemus albiceps	Liolaemidae	6	18.2	-8.8
Liolaemus austromendocinus	Liolaemus austromendocinus	Liolaemidae	11.07	27.5	-3.11
Liolaemus belli	Liolaemus bellii	Liolaemidae	6.91	20.49	-3.92
Liolaemus bibronii	Liolaemus bibronii	Liolaemidae	9.47	23.24	-1.94
Liolaemus bitaeniatus	Liolaemus bitaeniatus	Liolaemidae	15.16	27.33	1.2
Liolaemus boulengeri	Liolaemus boulengeri	Liolaemidae	8.95	23.59	-2.7
Liolaemus buergeri	Liolaemus buergeri	Liolaemidae	5.88	21.35	-5.96
Liolaemus canqueli	Liolaemus canqueli	Liolaemidae	10.92	25.27	-0.63
Liolaemus capillitas	Liolaemus capillitas	Liolaemidae	12.1	24.73	-1.64
Liolaemus chacoensis	Liolaemus chacoensis	Liolaemidae	21.15	34.22	6.91
Liolaemus chaltin	Liolaemus chaltin	Liolaemidae	11.42	23.48	-4.12
Liolaemus chiliensis	Liolaemus chiliensis	Liolaemidae	11.28	24.87	1.93
Liolaemus hernani	Liolaemus curicensis	Liolaemidae	9.63	25.08	-1.48
Liolaemus cuyanus	Liolaemus cuyanus	Liolaemidae	16.65	32.76	0.4
Liolaemus cyanogaster	Liolaemus cyanogaster	Liolaemidae	9.8	21.52	1.82
Liolaemus darwinii	Liolaemus darwinii	Liolaemidae	14.13	30.06	0.06
Liolaemus dicktracyi	Liolaemus dicktracyi	Liolaemidae	11.25	24.8	-2.68
Liolaemus dorbignyi	Liolaemus dorbignyi	Liolaemidae	9.6	21.3	-3
Liolaemus cf elongatus	Liolaemus elongatus	Liolaemidae	8.24162	23.2097	-2.42432
Liolaemus fabiani	Liolaemus fabiani	Liolaemidae	13.9	24.8833	1.08333
Liolaemus fitzingerii	Liolaemus fitzingerii	Liolaemidae	9.5	21.94	-1.09
Liolaemus fuscus	Liolaemus fuscus	Liolaemidae	13.24	25.98	3.42
Liolaemus gracilis	Liolaemus gracilis	Liolaemidae	14.6	30.91	0.4
Liolaemus grosseorum	Liolaemus grosseorum	Liolaemidae	13.58	30.46	-1.3
Liolaemus huacahuasicus	Liolaemus huacahuasicus	Liolaemidae	10.5	22.3	-2.5
Liolaemus irregularis	Liolaemus irregularis	Liolaemidae	6.18	18.57	-8.95
Liolaemus kingii	Liolaemus kingii	Liolaemidae	9.13	21.81	-1.68
Liolaemus koslowskyi	Liolaemus koslowskyi	Liolaemidae	16.2121	30.4849	0.209091
Liolaemus kriegi	Liolaemus kriegi	Liolaemidae	7.83	22.66	-2.79
Liolaemus laurenti	Liolaemus laurenti	Liolaemidae	17.23	32.95	0.64
Liolaemus lemniscatus	Liolaemus lemniscatus	Liolaemidae	11.32	25.31	1.87
Liolaemus leopardinus	Liolaemus leopardinus	Liolaemidae	4	17.4	-6.82
Liolaemus lutzae	Liolaemus lutzae	Liolaemidae	23.14	29.88	16.02
Liolaemus magellanicus	Liolaemus magellanicus	Liolaemidae	5.74	15.67	-2.63
Liolaemus melanops	Liolaemus melanops	Liolaemidae	12.2035	27.5586	-0.73448
Liolaemus monticola	Liolaemus monticola	Liolaemidae	11.0375	25.1775	0.0425
Liolaemus multicolor	Liolaemus multicolor	Liolaemidae	7.99	21.33	-8.59
Liolaemus multimaculatus	Liolaemus multimaculatus	Liolaemidae	14.14	28	3.32
Liolaemus nigromaculatus	Liolaemus nigromaculatus	Liolaemidae	15.02	24.53	5.98
Liolaemus nigroviridis	Liolaemus nigroviridis	Liolaemidae	9.84	23.85	-1.1
Liolaemus nitidus	Liolaemus nitidus	Liolaemidae	12.68	25.14	2.83
Liolaemus occipitalis	Liolaemus occipitalis	Liolaemidae	18.85	27.15	10.5
Liolaemus olongasta	Liolaemus olongasta	Liolaemidae	16.28	32.15	-0.33
Liolaemus ornatus	Liolaemus ornatus	Liolaemidae	7.05	18.78	-7.98
Liolaemus petrophilus	Liolaemus petrophilus	Liolaemidae	10.01	25.18	-2.33
Liolaemus pictus	Liolaemus pictus	Liolaemidae	9.38	21.26	1.23
Liolaemus platei	Liolaemus platei	Liolaemidae	13.67	23.28	4.77
Liolaemus pseudoanomalus	Liolaemus pseudoanomalus	Liolaemidae	16.41	30.87	0.1
Liolaemus pseudolemniscatus	Liolaemus pseudolemniscatus	Liolaemidae	13.29	24.63	3.49
Liolaemus puna	Liolaemus puna	Liolaemidae	8.11	19.85	-6.86
Liolaemus quilmes	Liolaemus quilmes	Liolaemidae	10.54	22.27	-2.59
Liolaemus ramirezae	Liolaemus ramirezae	Liolaemidae	10.56	22.39	-3.4
Liolaemus riojanus	Liolaemus riojanus	Liolaemidae	16.64	32.55	0.14
Liolaemus robertmertensi	Liolaemus robertmertensi	Liolaemidae	16.2	30.22	0.28
Liolaemus rothi	Liolaemus rothi	Liolaemidae	8.97	24.57	-2.77
Liolaemus ruibali	Liolaemus ruibali	Liolaemidae	5.64	19.16	-6.51
Liolaemus scapularis	Liolaemus scapularis	Liolaemidae	11.47	23.48	-1.77
Liolaemus schroederi	Liolaemus schroederi	Liolaemidae	11.58	26.21	1.5
Liolaemus telsen	Liolaemus telsen	Liolaemidae	9.52	25.28	-3.47
Liolaemus tenuis	Liolaemus tenuis	Liolaemidae	11.94	25.82	2.4
Liolaemus umbrifer	Liolaemus umbrifer	Liolaemidae	7.42	18.76	-4.95
Liolaemus uspallatensis	Liolaemus uspallatensis	Liolaemidae	7.35	21.32	-5.24
Liolaemus vallecurensis	Liolaemus vallecurensis	Liolaemidae	8.4	21.2	-3.69
Liolaemus walkeri	Liolaemus walkeri	Liolaemidae	6.60577	14.6635	-3.80385
Liolaemus xanthoviridis	Liolaemus xanthoviridis	Liolaemidae	11.94	24.98	0.75
Phymaturus antofagastensis	Phymaturus antofagastensis	Liolaemidae	4.55	14.55	-6.1
Phymaturus indistinctus	Phymaturus indistinctus	Liolaemidae	9.35	22.4	-1.65
Phymaturus palluma	Phymaturus palluma	Liolaemidae	3.54	18.3	-8.42
Phymaturus patagonicus	Phymaturus patagonicus	Liolaemidae	9.35	24.25	-2.41667
Phymaturus somuncurensis	Phymaturus somuncurensis	Liolaemidae	9.4	25.21	-3.7
Oplurus cuvieri	Oplurus cuvieri	Opluridae	25.17	33.53	14.39
Oplurus cyclurus	Oplurus cyclurus	Opluridae	24.77	33.62	13.46
Callisaurus draconoides	Callisaurus draconoides	Phrynosomatidae	17.49	35.56	1.29
Cophosaurus texanus	Cophosaurus texanus	Phrynosomatidae	18.08	34.33	0.86
Holbrookia maculata	Holbrookia maculata	Phrynosomatidae	13.55	32.68	-5.39
Holbrookia propinqua	Holbrookia propinqua	Phrynosomatidae	21.72	35.73	5.99
Petrosaurus mearnsi	Petrosaurus mearnsi	Phrynosomatidae	16.41	33.08	2.75
Petrosaurus thalissinus	Petrosaurus thalassinus	Phrynosomatidae	21.69	32.72	9
Anota coronatum	Phrynosoma blainvillii	Phrynosomatidae	15.042	30.211	2.84462
Phrynosoma cornutum	Phrynosoma cornutum	Phrynosomatidae	17.06	34.02	-0.85
Phrynosoma coronatum	Phrynosoma coronatum	Phrynosomatidae	17.02	32.95	3.94
Phrynosoma douglassii	Phrynosoma douglassii	Phrynosomatidae	7.95	29.9	-11.775
Phrynosoma mcalli	Phrynosoma mcallii	Phrynosomatidae	22.03	39.82	5.42
Doliosaurus modestum	Phrynosoma modestum	Phrynosomatidae	17.05	33.62	-0.47
Doliosaurus platyrhinos	Phrynosoma platyrhinos	Phrynosomatidae	11.88	33.19	-5.44
Anota solare	Phrynosoma solare	Phrynosomatidae	20.53	35.97	4.8
Sceloporus aeneus	Sceloporus aeneus	Phrynosomatidae	15.32	26.36	3.72
Sceloporus bicanthalis	Sceloporus bicanthalis	Phrynosomatidae	13.69	24.35	2.32
Sceloporus consobrinus	Sceloporus consobrinus	Phrynosomatidae	15.6991	33.5331	-2.68902
Sceloporus cyanogenys	Sceloporus cyanogenys	Phrynosomatidae	21.8865	34.572	7.72248
Sceloporus gadoviae	Sceloporus gadoviae	Phrynosomatidae	23.02	35.02	10.83
Sceloporus g. vandenburgianus	Sceloporus graciosus	Phrynosomatidae	8.1	29.74	-9.25
Sceloporus grammicus	Sceloporus grammicus	Phrynosomatidae	18.72	31.08	5.26
Sceloporus grandaveus	Sceloporus grandaevus	Phrynosomatidae	23.32	35.66	9.7
Sceloporus horridus	Sceloporus horridus	Phrynosomatidae	22.5	33.86	10.16
Sceloporus jarrovi	Sceloporus jarrovii	Phrynosomatidae	14.6814	29.5258	0.143806
Sceloporus magister	Sceloporus magister	Phrynosomatidae	15.89	34.62	-1.48
Sceloporus f. malachiticus	Sceloporus malachiticus	Phrynosomatidae	21.77	29.82	14.2
Sceloporus merriami	Sceloporus merriami	Phrynosomatidae	18.57	34.29	0.8
Sceloporus mucronatus	Sceloporus mucronatus	Phrynosomatidae	15.39	26.09	3.88
Sceloporus occidentalis	Sceloporus occidentalis	Phrynosomatidae	9.51	29.73	-5.79
Sceloporus ochoteranae	Sceloporus ochoterenae	Phrynosomatidae	23.38	35.07	12.03
Sceloporus olivaceus	Sceloporus olivaceus	Phrynosomatidae	19.97	34.79	3.56
Sceloporus orcutti	Sceloporus orcutti	Phrynosomatidae	18.17	33.33	5.04
Sceloporus paliciosi	Sceloporus palaciosi	Phrynosomatidae	12.15	22.28	0.88
Sceloporus poinsetti	Sceloporus poinsettii	Phrynosomatidae	17.35	32.92	0.61
Sceloporus scalaris	Sceloporus scalaris	Phrynosomatidae	17.32	29.02	4.92
Sceloporus serrifer	Sceloporus serrifer	Phrynosomatidae	22.81	33.71	10.69
Sceloporus siniferus	Sceloporus siniferus	Phrynosomatidae	23.85	33.28	13.94
Sceloporus squamosus	Sceloporus squamosus	Phrynosomatidae	24.87	32.84	17.4
Sceloporus torquatus	Sceloporus torquatus	Phrynosomatidae	17.07	29.08	4.33
Sceloporus undulatus	Sceloporus undulatus	Phrynosomatidae	14.51	32.38	-3.56
Sceloporus olloporus	Sceloporus variabilis	Phrynosomatidae	22.63	33.07	11.43
Sceloporus virgatus	Sceloporus virgatus	Phrynosomatidae	14.98	31.38	-1.48
Sceloporus woodi	Sceloporus woodi	Phrynosomatidae	22.26	32.68	9.9
Uma exsul	Uma exsul	Phrynosomatidae	19.86	33.1	4.87
Uma inornata	Uma inornata	Phrynosomatidae	18.54	38.1	2.18
Uma notata	Uma notata	Phrynosomatidae	22.18	41.01	4.89
Uma paraphygas	Uma paraphygas	Phrynosomatidae	19.04	33.28	3.9
Uma scoparia	Uma scoparia	Phrynosomatidae	19.7	39.6	2.52
Urosaurus auriculatus	Urosaurus auriculatus	Phrynosomatidae	23.9	30.25	16.38
Urosaurus clarionensis	Urosaurus clarionensis	Phrynosomatidae	24.7	30.1	16.8
Urosaurus graciosus	Urosaurus graciosus	Phrynosomatidae	20.18	38.99	3.32
Urosaurus nigricaudus	Urosaurus nigricaudus	Phrynosomatidae	19.69	33.71	6.9
Urosaurus ornatus	Urosaurus ornatus	Phrynosomatidae	15.56	33.88	-2.2
Uta palmeri	Uta palmeri	Phrynosomatidae	23.3	37.65	8.7
Uta antiqua	Uta stansburiana	Phrynosomatidae	14.12	33.2	-2.89
Phyllodactylus reissi	Phyllodactylus reissii	Phyllodactylidae	22.29	29.78	15.2
Phyllodactylus tuberculosus	Phyllodactylus tuberculosus	Phyllodactylidae	24.88	33.16	16.43
Phyllopezus pollicaris	Phyllopezus pollicaris	Phyllodactylidae	24.7429	33.7048	14.8762
Phyllorhynchus decurtatus	Phyllorhynchus decurtatus	Phyllodactylidae	19.95	37.31	3.87
Ptyodactylus hasselquistii	Ptyodactylus hasselquistii	Phyllodactylidae	21.7503	35.1275	8.51917
Tarentola boettgeri	Tarentola boettgeri	Phyllodactylidae	18.07	26.7	11.49
Tarentola mauritanica	Tarentola mauritanica	Phyllodactylidae	15.69	31.06	3.14
Thecadactylus rapicauda	Thecadactylus rapicauda	Phyllodactylidae	25.6755	31.9401	19.5338
Polychrus acutirostris	Polychrus acutirostris	Polychrotidae	23.4475	32.6	13.14
Delma impar	Delma impar	Pygopodidae	13.9343	26.5494	4.17779
Acontias meleagris	Acontias meleagris	Scincidae	16.8218	27.1049	6.37525
Anomalopus leuckartii	Anomalopus leuckartii	Scincidae	16.3285	30.2391	1.68421
Bassiana duperreyi	Bassiana duperreyi	Scincidae	13.3434	25.2896	4.12535
Bellatorias major	Bellatorias major	Scincidae	17.5999	27.1167	6.27748
Mabuya agilis	Brasiliscincus agilis	Scincidae	21.9818	29.7727	13.9364
Mabuya heathi	Brasiliscincus heathi	Scincidae	23.7828	30.1069	18.0138
Carlia fusca	Carlia fusca	Scincidae	25.0289	30.7967	19.4711
Carlia longipes	Carlia longipes	Scincidae	25.6201	32.5064	17.7487
Carlia munda	Carlia munda	Scincidae	26.2422	35.5742	14.6538
Carlia pectoralis	Carlia pectoralis	Scincidae	20.5098	31.6649	6.87101
Carlia rhomboidalis	Carlia rhomboidalis	Scincidae	22.068	30.6343	10.9337
Carlia schmeltzi	Carlia schmeltzii	Scincidae	21.9753	31.7349	9.83451
Carlia vivax	Carlia vivax	Scincidae	20.9126	30.9003	8.84262
Chalcides ocellatus	Chalcides ocellatus	Scincidae	20.1608	33.251	7.73252
Tropidophorus queenslandiae	Concinnia queenslandiae	Scincidae	21.1758	29.2563	11.8625
Eulamprus tenuis	Concinnia tenuis	Scincidae	17.7532	28.4431	5.43312
Mabuya nigropunctata	Copeoglossum nigropunctatum	Scincidae	25.2956	31.6696	19.6565
Corucia zebrata	Corucia zebrata	Scincidae	25.875	30.0562	21.8813
Ctenotus atlas	Ctenotus atlas	Scincidae	17.5825	32.5385	4.60945
Sphenomorphus lesueurii	Ctenotus australis	Scincidae	19.0719	31.6496	9.13967
Ctenotus brooksi	Ctenotus brooksi	Scincidae	20.8378	36.1576	5.04433
Ctenotus calurus	Ctenotus calurus	Scincidae	21.9398	37.3747	5.21165
Ctenotus essingtoni	Ctenotus essingtonii	Scincidae	27.2594	34.8647	17.4983
Ctenotus fallens	Ctenotus fallens	Scincidae	19.0453	32.3294	8.64831
Ctenotus grandis	Ctenotus grandis	Scincidae	24.254	38.2636	8.16391
Ctenotus labillardieri	Ctenotus labillardieri	Scincidae	15.75	27.5206	6.78866
Ctenotus leae	Ctenotus leae	Scincidae	21.1616	36.7446	5.27347
Ctenotus leonhardii	Ctenotus leonhardii	Scincidae	22.44	37.73	5.99
Ctenotus pantherinus	Ctenotus pantherinus	Scincidae	23.3738	37.3986	7.79955
Ctenotus piankai	Ctenotus piankai	Scincidae	23.8156	37.7962	7.30415
Ctenotus quattuordeimlineatus	Ctenotus quattuordecimlineatus	Scincidae	21.6932	36.9742	5.18766
Ctenotus regius	Ctenotus regius	Scincidae	19.3664	34.9075	4.83372
Ctenotus robustus	Ctenotus robustus	Scincidae	17.7599	30.3063	5.29415
Ctenotus schomburgkii	Ctenotus schomburgkii	Scincidae	19.2417	34.3276	5.08149
Ctenotus spaldingi	Ctenotus spaldingi	Scincidae	21.089	32.8523	8.98477
Ctenotus taeniolalatus	Ctenotus taeniolatus	Scincidae	16.3573	28.0102	3.92839
Ctenotus uber	Ctenotus uber	Scincidae	19.3363	34.8201	5.19049
Cyclodomorphus branchialis	Cyclodomorphus branchialis	Scincidae	20.9342	35.8	6.29211
Egernia depressa	Egernia depressa	Scincidae	21.1784	36.6268	6.92211
Egernia richardi	Egernia richardi	Scincidae	16.8687	30.5297	5.34922
Egernia saxatilis	Egernia saxatilis	Scincidae	12.5885	24.666	2.3072
Egernia stokesii	Egernia stokesii	Scincidae	19.5382	35.018	4.9793
Eremiascincus fasciolatus	Eremiascincus fasciolatus	Scincidae	21.0327	35.4078	5.74524
Eremiascincus richardsoni	Eremiascincus richardsonii	Scincidae	19.886	35.0578	5.28212
Eulamprus heatwolei	Eulamprus heatwolei	Scincidae	14.88	29.88	1.3
Eulamprus kosciuskoi	Eulamprus kosciuskoi	Scincidae	9.15602	21.427	-1.84895
Eulamprus quoyi	Eulamprus quoyii	Scincidae	16.2159	27.078	4.22673
Eulamprus tympanum	Eulamprus tympanum	Scincidae	11.0703	23.6046	1.2453
Eutropis multifasciata	Eutropis multifasciata	Scincidae	24.9784	31.7467	17.4852
Eutropis rudis	Eutropis rudis	Scincidae	25.7159	30.4809	21.3794
Glaphyromorphus punctulatus	Glaphyromorphus punctulatus	Scincidae	22.3096	31.7447	10.1374
Hemiergis decresiensis	Hemiergis decresiensis	Scincidae	16.54	31.51	3.23
Hemiergis peronii	Hemiergis peronii	Scincidae	15.7121	26.632	7.0709
Hemiergis quadrilineatum	Hemiergis quadrilineata	Scincidae	18.1673	30.5741	8.74049
Sphenomorphus arborens	Insulasaurus arborens	Scincidae	23.7557	29.2314	18.9486
Lampropholis delicata	Lampropholis delicata	Scincidae	16.1266	26.7484	4.73975
Lampropholis guichenoti	Lampropholis guichenoti	Scincidae	14.1416	25.9741	3.47407
Lerista bougainvilli	Lerista bougainvillii	Scincidae	14.7249	28.2149	4.04364
Lerista connivens	Lerista connivens	Scincidae	22.5	36.57	9.62
Lerista frosti	Lerista frosti	Scincidae	20.4491	36.0155	3.70364
Lerista lineopunctulata	Lerista lineopunctulata	Scincidae	20.5064	33.6288	9.4072
Lerista macropisthopus	Lerista macropisthopus	Scincidae	21.3997	36.2497	8.03239
Lerista neander	Lerista neander	Scincidae	23.9089	38.8033	7.45889
Lerista orientalis	Lerista orientalis	Scincidae	26.8892	36.9797	13.9739
Lerista terdigitata	Lerista terdigitata	Scincidae	17.0478	29.7351	6.1403
Egernia inornata	Liopholis inornata	Scincidae	20.61	36.27	5.12
Egernia striolata	Liopholis striata	Scincidae	23.87	38.32	7.39
Liopholis whitii	Liopholis whitii	Scincidae	15.37	28.47	3.39
Lipinia pulchella	Lipinia pulchella	Scincidae	25.19	30.94	19.9
Lygisaurus foliorum	Lygisaurus foliorum	Scincidae	19.0183	30.7645	5.46218
Mochlus sundevallii	Mochlus sundevalli	Scincidae	22.1	32.31	10.19
Morethia butleri	Morethia butleri	Scincidae	18.6917	34.0208	5.21257
Niveoscincus metallicus	Niveoscincus metallicus	Scincidae	11.8922	22.3217	3.6243
Niveoscincus ocellatus	Niveoscincus ocellatus	Scincidae	9.58444	19.7833	1.49
Mabuya frenata	Notomabuya frenata	Scincidae	21.7821	31.9846	10.8013
Oligosoma maccanni	Oligosoma maccanni	Scincidae	9.402	20.862	-0.998
Parvoscincus decipiens	Parvoscincus decipiens	Scincidae	22.68	28.1	17.64
Pinoyscincus abdictus	Pinoyscincus abdictus	Scincidae	25.5243	31.6243	19.7487
Pinoyscincus jagori	Pinoyscincus jagori	Scincidae	25.5	30.9204	20.6612
Eumeces anthracinus	Plestiodon anthracinus	Scincidae	14.75	32.01	-3.25
Plestiodon chinensis	Plestiodon chinensis	Scincidae	19.96	30.32	8.1
Plestiodon egregius	Plestiodon egregius	Scincidae	19.69	32.91	4.77
Eumeces elegans	Plestiodon elegans	Scincidae	19.3333	29.5	8.125
Eumeces fasciatus	Plestiodon fasciatus	Scincidae	13.78	31.15	-4.11
Eumeces gilberti	Plestiodon gilberti	Scincidae	14.33	32.78	-0.12
Plestiodon inexpectatus	Plestiodon inexpectatus	Scincidae	17.17	32.27	0.98
Eumeces laticeps	Plestiodon laticeps	Scincidae	15.68	32.25	-1.73
Plestiodon latiscutatus	Plestiodon latiscutatus	Scincidae	14.3333	29.9267	-0.47333
Eumeces obsoletus	Plestiodon obsoletus	Scincidae	15.71	33.74	-2.86
Plestiodon reynoldsi	Plestiodon reynoldsi	Scincidae	22.125	33.0625	8.9875
Eumeces septentrionalis	Plestiodon septentrionalis	Scincidae	11.81	31.79	-9.28
Eumeces skiltonianus	Plestiodon skiltonianus	Scincidae	8.13	28.66	-7.44
Eumeces brevilineatus	Plestiodon tetragrammus	Scincidae	20.15	35.08	3.45
Pseudemoia entrecasteauxii	Pseudemoia entrecasteauxii	Scincidae	10.3553	22.6726	0.51106
Mabuya macrorhyncha	Psychosaura macrorhyncha	Scincidae	22.6455	29.8636	15.2727
Saiphos equalis	Saiphos equalis	Scincidae	15.6949	26.2767	3.79509
Saproscincus basiliscus	Saproscincus basiliscus	Scincidae	21.4675	29.6412	11.6771
Saproscincus mustelina	Saproscincus mustelinus	Scincidae	13.9428	25.1832	3.30477
Saproscincus tetradactyla	Saproscincus tetradactylus	Scincidae	21.1281	29.3549	11.4354
Scelotes gronovii	Scelotes gronovii	Scincidae	17.1417	26.4583	8.4
Lygosoma laterale	Scincella gemmingeri	Scincidae	16.95	27.37	6.17
Scincella laterale	Scincella lateralis	Scincidae	16.44	32.83	-0.91
Scincus mitranus	Scincus mitranus	Scincidae	26.085	39.64	11.8625
Eulamprus murrayi	Silvascincus murrayi	Scincidae	15.4946	25.7118	3.96727
Sphenomorphus indicus	Sphenomorphus indicus	Scincidae	19.8657	28.4471	9.62178
Sphenomorphus sabanus	Sphenomorphus sabanus	Scincidae	25.8539	30.4769	21.7538
Tiliqua nigrolutea	Tiliqua nigrolutea	Scincidae	12.3168	24.5548	2.43253
Tiliqua occipitalis	Tiliqua occipitalis	Scincidae	17.8371	32.102	5.61216
Tiliqua rugosa	Tiliqua rugosa	Scincidae	16.7298	30.8218	4.83183
Tiliqua scincoides	Tiliqua scincoides	Scincidae	17.1363	28.5761	5.57963
Trachylepis brevicollis	Trachylepis brevicollis	Scincidae	24.9218	34.5839	15.5322
Trachylepis capensis	Trachylepis capensis	Scincidae	16.9012	28.0479	3.37548
Trachylepis occidentalis	Trachylepis occidentalis	Scincidae	18.9043	31.4929	4.77286
Trachylepis perrotetii	Trachylepis perrotetii	Scincidae	25.7727	34.6841	17.3273
Trachylepis quinquetaeniata	Trachylepis quinquetaeniata	Scincidae	23.0224	33.3762	11.5439
Trachylepis spilogaster	Trachylepis spilogaster	Scincidae	19.4735	32.0536	4.28066
Mabuya striata	Trachylepis striata	Scincidae	20.7786	30.5058	8.56333
Trachylepis varia	Trachylepis varia	Scincidae	19.109	28.9354	6.06857
Trachylepis variegata	Trachylepis variegata	Scincidae	18.4517	30.8622	4.44826
Typhlacontias brevipes	Typhlacontias brevipes	Scincidae	18.05	24.8594	9.975
Coleodactylus amazonicus	Chatogekko amazonicus	Sphaerodactylidae	25.7132	32.3843	20.0277
Coleodactylus septentrionalis	Coleodactylus septentrionalis	Sphaerodactylidae	25.7	31.82	19.74
Gonatodes antillensis	Gonatodes antillensis	Sphaerodactylidae	27.4	31.5917	23.4833
Gonatodes concinnatus	Gonatodes concinnatus	Sphaerodactylidae	25.65	31.24	20.03
Gonatodes hasemani	Gonatodes hasemani	Sphaerodactylidae	25.84	32.79	18.63
Gonatodes humeralis	Gonatodes humeralis	Sphaerodactylidae	25.8725	32.1955	19.902
Pristurus carteri	Pristurus carteri	Sphaerodactylidae	25.94	36.9	14.51
Sphaerodactylus gaigeae	Sphaerodactylus gaigeae	Sphaerodactylidae	25.3	31.3	18.3
Sphaerodactylus klauberi	Sphaerodactylus klauberi	Sphaerodactylidae	23.39	29.86	16.2
Sphaerodactylus macrolepis	Sphaerodactylus macrolepis	Sphaerodactylidae	25.2987	31.2321	18.7487
Sphaerodactylus nicholsi	Sphaerodactylus nicholsi	Sphaerodactylidae	24.4	30.9	17.1
Sphaerodactylus roosevelti	Sphaerodactylus roosevelti	Sphaerodactylidae	26.1167	32.65	18.65
Sphaerodactylus townsendi	Sphaerodactylus townsendi	Sphaerodactylidae	26.2333	31.6667	20.4333
Teratoscincus przewalskii	Teratoscincus przewalskii	Sphaerodactylidae	9	32	-16.69
Sphenodon punctatus	Sphenodon punctatus	Sphenodontidae	12.6017	21.2678	5.02226
Ameiva ameiva	Ameiva ameiva	Teiidae	25.0432	31.7668	18.3498
Ameiva bifrontata	Ameiva bifrontata	Teiidae	26.7256	32.9422	20.6511
Ameiva chrysolaema	Ameiva chrysolaema	Teiidae	24.72	31.83	16.85
Ameiva exsul	Ameiva exsul	Teiidae	25.6299	31.7597	18.7552
Ameiva fuscata	Ameiva fuscata	Teiidae	25.75	30.8	20.1
Ameiva pluvianotata	Ameiva pluvianotata	Teiidae	26.6	31.3	21.6
Ameiva taeniura	Ameiva taeniura	Teiidae	24.8427	31.6226	17.2729
Cnemidophorus ocellifer	Ameivula ocellifera	Teiidae	24.8808	32.0692	17.0846
Cnemidophorus ceralbensis	Aspidoscelis ceralbensis	Teiidae	23.32	35.66	9.7
Aspidoscelis gularis	Aspidoscelis gularis	Teiidae	19.14	34.47	2.34
Aspidoscelis hyperythra	Aspidoscelis hyperythra	Teiidae	19.46	33.43	6.89
Cnemidophorus inornatus	Aspidoscelis inornata	Teiidae	16.91	33.18	-0.23
Aspidoscelis sexlineata	Aspidoscelis sexlineata	Teiidae	15.02	32.81	-3.43
Aspidoscelis tigris	Aspidoscelis tigris	Teiidae	14.82	33.59	-2.02
Callopistes maculatus	Callopistes maculatus	Teiidae	14.4143	25.0857	5.17619
Cnemidophorus gramivagus	Cnemidophorus gramivagus	Teiidae	27.08	34.37	21.5
Cnemidophorus lemniscatus	Cnemidophorus lemniscatus	Teiidae	26.0113	32.2255	20.1718
Crocodilurus amazonicus	Crocodilurus amazonicus	Teiidae	26.11	32.68	19.94
Dracaena guianensis	Dracaena guianensis	Teiidae	24.9778	31.4611	18.4722
Ameiva festiva	Holcosus festivus	Teiidae	24.831	31.3197	18.7982
Ameiva quadrilineata	Holcosus quadrilineatus	Teiidae	25.19	31.89	19.32
Kentropyx altamazonica	Kentropyx altamazonica	Teiidae	25.5467	32.2416	19.0922
Kentropyx calcarata	Kentropyx calcarata	Teiidae	25.7615	32.2573	20.1786
Kentropyx pelviceps	Kentropyx pelviceps	Teiidae	25.3363	31.454	19.3782
Kentropyx striata	Kentropyx striata	Teiidae	26.5421	32.879	21.1684
Tupinambis merrianae	Salvator merianae	Teiidae	23.08	32.37	14
Tupinambis quadilineatus	Tupinambis quadrilineatus	Teiidae	21.1761	29.2982	11.815
Trogonophis wiegmanni	Trogonophis wiegmanni	Trogonophidae	15.78	32.45	2.64
Eurolophosaurus divaricatus	Eurolophosaurus divaricatus	Tropiduridae	25.9	34.6	16.2
Eurolophosaurus nanuzae	Eurolophosaurus nanuzae	Tropiduridae	19.47	27.9	10.19
Microlophus albemarlensis	Microlophus albemarlensis	Tropiduridae	22.26	28.96	17.44
Microlophus atacamensis	Microlophus atacamensis	Tropiduridae	16.85	25.01	9.24
Microlophus peruvianus	Microlophus peruvianus	Tropiduridae	21.63	30.24	13.89
Microlophus quadrivittatus	Microlophus quadrivittatus	Tropiduridae	18.2667	26.2	11.4333
Plica plica	Plica plica	Tropiduridae	25.327	31.6035	19.5099
Plica umbra	Plica umbra	Tropiduridae	25.4151	31.5437	19.7294
Tropidurus hispidus	Tropidurus hispidus	Tropiduridae	25.2571	32.0413	18.5833
Tropidurus hygomi	Tropidurus hygomi	Tropiduridae	22.3	28.6	14.75
Tropidurus insularis	Tropidurus insulanus	Tropiduridae	15.1	23.9	6.8
Tropidurus itambere	Tropidurus itambere	Tropiduridae	20.5857	28.2714	10.9786
Tropidurus montanus	Tropidurus montanus	Tropiduridae	21.16	29.14	11.58
Tropidurus oreadicus	Tropidurus oreadicus	Tropiduridae	25.6458	33.7708	17.1
Tropidurus psammonastes	Tropidurus psammonastes	Tropiduridae	25.67	34.22	16.35
Tropidurus spinulosus	Tropidurus spinulosus	Tropiduridae	22.9	34.14	10.38
Tropidurus torquatus	Tropidurus torquatus	Tropiduridae	24.91	32.46	16.94
Uracentron flaviceps	Uracentron flaviceps	Tropiduridae	25.3692	30.9962	19.8462
Uranoscodon superciliosus	Uranoscodon superciliosus	Tropiduridae	26.3849	32.7394	20.9252
Varanus bengalensis	Varanus bengalensis	Varanidae	23.73	35.05	10.95
Varanus brevicauda	Varanus brevicauda	Varanidae	24.3434	38.1019	8.53283
Varanus caudolineatus	Varanus caudolineatus	Varanidae	21.5638	37.2812	6.8744
Varanus eremius	Varanus eremius	Varanidae	22.8245	37.2711	7.20104
Varanus exanthematicus	Varanus exanthematicus	Varanidae	26.05	35.32	17.11
Varanus giganteus	Varanus giganteus	Varanidae	21.366	36.8528	4.6012
Varanus gilleni	Varanus gilleni	Varanidae	21.8962	36.884	5.67615
Varanus gouldii	Varanus gouldii	Varanidae	20.276	34.2058	6.32666
Varanus griseus	Varanus griseus	Varanidae	22.0943	35.4761	9.34527
Varanus indicus	Varanus indicus	Varanidae	25.73	31.91	19.23
Varanus komodoensis	Varanus komodoensis	Varanidae	24.8385	31.4154	17.2231
Varanus mertensi	Varanus mertensi	Varanidae	27.0558	36.1459	15.6528
Varanus niloticus	Varanus niloticus	Varanidae	23.2118	32.2636	12.9911
Varanus panoptes	Varanus panoptes	Varanidae	24.386	35.2902	11.5398
Varanus rosenbergi	Varanus rosenbergi	Varanidae	16.25	29.58	5.3
Varanus salvator	Varanus salvator	Varanidae	25.39	32.21	18.01
Varanus scalaris	Varanus scalaris	Varanidae	26.47	35.06	15.94
Varanus tristus	Varanus tristis	Varanidae	22.9977	35.4026	9.05375
Varanus varius	Varanus varius	Varanidae	16.7492	28.1215	4.84354
Agkistrodon contortrix	Agkistrodon contortrix	Viperidae	14.94	32.07	-2.95
Agkistrodon piscivorus	Agkistrodon piscivorus	Viperidae	17.48	33.25	0.56
Crotalus atrox	Crotalus atrox	Viperidae	18.14	34.75	0.87
Crotalus cerastes	Crotalus cerastes	Viperidae	18.85	37.56	2.09
Crotalus horridus	Crotalus horridus	Viperidae	14.19	31.56	-3.88
Crotalus mitchelli	Crotalus mitchellii	Viperidae	17.91	35.92	2.21
Crotalus pricei	Crotalus pricei	Viperidae	16.35	30.61	1.53
Crotalus scutulatus	Crotalus scutulatus	Viperidae	17.47	33.92	1.28
Crotalus viridis	Crotalus viridis	Viperidae	9.35	30.5	-10.58
Protobothrops mucrosquamatus	Protobothrops mucrosquamatus	Viperidae	17.18	30.54	2.05
Trimeresurus gracilis	Trimeresurus gracilis	Viperidae	10.6143	17.6143	1.48571
Xantusia arizonae	Xantusia arizonae	Xantusidae	15.83	35.93	-1.6
Xantusia henshawi	Xantusia henshawi	Xantusidae	15.83	32.86	2.12
Klauberina riversiana	Xantusia riversiana	Xantusidae	15.41	21.99	9.2
Xantusia vigilis	Xantusia vigilis	Xantusidae	16.44	35.41	0.44
Lepidophyma flavimaculatum	Lepidophyma flavimaculatum	Xantusiidae	24.94	31.79	18.35
Xenosaurus grandis	Xenosaurus grandis	Xenosauridae	20.4	29.22	11.27
Xenosaurus platyceps	Xenosaurus platyceps	Xenosauridae	19.09	30.28	6.2

## Sheet: Birds
Species	Species name in tree	Family	Bio1	Bio5	Bio6
Aphelocoma california	Aphelocoma californica	Acanthizidae	11.6749	30.4046	-4.7416
Crateroscelis robusta	Crateroscelis robusta	Acanthizidae	24.0351	29.4802	18.9841
Sericornis papuensis	Sericornis papuensis	Acanthizidae	16.0582	22.3294	10.2233
Accipiter striatus	Accipiter striatus	Accipitridae	6.84157	25.1939	-11.4065
Buteo jamaicensis	Buteo jamaicensis	Accipitridae	6.15172	26.1521	-13.6422
Buteo lagopus	Buteo lagopus	Accipitridae	-9.96643	14.3937	-31.7669
Buteo swainsoni	Buteo swainsoni	Accipitridae	4.35154	26.0163	-15.8221
Circus (cyaneus) hudsonius	Circus cyaneus	Accipitridae	-1.39137	22.2609	-24.1872
Geranoaetus melanoleucus	Geranoaetus melanoleucus	Accipitridae	16.53	27.7059	5.80553
Gypaetus barbatus	Gypaetus barbatus	Accipitridae	5.79808	23.787	-12.8804
Haliaeetus leucophalus	Haliaeetus leucocephalus	Accipitridae	-0.03172	21.5674	-21.2379
Milvus migrans	Milvus migrans	Accipitridae	13.0565	30.0004	-4.25223
Petrochelidon [lunifrons]	Petrochelidon pyrrhonota	Accipitridae	4.93819	25.6014	-15.2082
Spizella [monticola]	Spizella arborea	Accipitridae	8.97282	28.2989	-10.0532
Acrocephalus schoenobaenus	Acrocephalus schoenobaenus	Acrocephalidae	14.7108	30.8151	-1.04434
Acrocephalus scirpaceus	Acrocephalus scirpaceus	Acrocephalidae	15.9684	31.7005	0.474076
Psaltriparus minimus	Psaltriparus minimus	Aegithalidae	13.0417	30.6477	-2.73159
Aegotheles cristatus	Aegotheles cristatus	Aegothelidae	21.4735	35.0422	7.25626
Alaemon alaudipes	Alaemon alaudipes	Alaudidae	23.7413	39.9087	7.21832
Alauda arvensis	Alauda arvensis	Alaudidae	2.67901	24.6665	-18.7031
Eremalauda dunni	Eremalauda dunni	Alaudidae	26.2665	40.9135	10.6074
Eremophila alpestris	Eremophila alpestris	Alaudidae	-0.40092	21.9464	-21.9196
Lullula arborea	Lullula arborea	Alaudidae	8.64638	25.6105	-6.31462
Alcedo atthis	Alcedo atthis	Alcedinidae	10.4834	27.9645	-7.20429
Alcedo azurea	Alcedo azurea	Alcedinidae	21.9307	32.216	11.0008
Dacelo gaudichaud	Dacelo gaudichaud	Alcedinidae	25.3151	30.5818	20.4435
Dacelo novaeguineae	Dacelo novaeguineae	Alcedinidae	19.1513	32.3424	5.79348
Tanysiptera galatea	Tanysiptera galatea	Alcedinidae	25.3019	30.5055	20.5256
Todiramphus sanctus	Todiramphus sanctus	Alcedinidae	20.9948	33.9892	7.44236
Aethia cristetella	Aethia cristatella	Alcidae	-0.39789	15.1231	-14.5751
Aethia pusilla	Aethia pusilla	Alcidae	-0.31092	12.1394	-11.9573
Alca torda	Alca torda	Alcidae	0.571424	14.5414	-12.2874
Alle alle	Alle alle	Alcidae	-11.5964	6.14859	-27.2914
Fratercula arctica	Fratercula arctica	Alcidae	-3.10607	11.6808	-16.8164
Fratercula cirrhata	Fratercula cirrhata	Alcidae	1.22577	15.3227	-11.9517
Synthliboramphus hypoleucus	Synthliboramphus hypoleucus	Alcidae	18.3311	29.8513	7.84485
Uria aalge	Uria aalge	Alcidae	2.65433	15.0928	-8.39473
Uria lomvia	Uria lomvia	Alcidae	-5.48862	10.8169	-20.1235
Anas acuta	Anas acuta	Anatidae	-4.13216	20.6415	-27.575
Anas americana	Anas americana	Anatidae	-1.16012	21.4558	-23.1944
Anas aucklandica	Anas aucklandica	Anatidae	6.9	13.1857	1.14286
Anas castanea	Anas castanea	Anatidae	18.6303	32.5825	5.16892
Anas clypeata	Anas clypeata	Anatidae	-0.95069	22.9487	-23.7045
Anas cyanoptera	Anas cyanoptera	Anatidae	10.7545	27.1028	-3.45146
Anas discors	Anas discors	Anatidae	3.41793	25.1001	-18.0175
Anas gracilis	Anas gracilis	Anatidae	21.4633	33.7233	8.73929
Anas laysanensis	Anas laysanensis	Anatidae	22.8429	29.0571	17.2286
Anas penelope	Anas penelope	Anatidae	-5.55233	20.3151	-29.6999
Anas platyrhynchos	Anas platyrhynchos	Anatidae	1.69674	23.3221	-18.9164
Anas rhynchotis	Anas rhynchotis	Anatidae	18.9287	32.7974	5.31841
Anas strepera	Anas strepera	Anatidae	3.80302	25.9763	-17.7408
Anser caerulescens	Chen caerulescens	Anatidae	-15.1309	9.13875	-36.4545
Aythya affinis	Aythya affinis	Anatidae	-1.65127	21.8779	-24.7141
Aythya americana	Aythya americana	Anatidae	3.88404	26.0899	-17.1389
Branta bernicla	Branta bernicla	Anatidae	-15.7498	7.5851	-35.7347
Branta canadensis	Branta canadensis	Anatidae	0.08277	21.9215	-21.3875
Bucephala clangula	Bucephala clangula	Anatidae	-3.66909	21.2224	-27.9987
Chlorestes notatus	Chlorestes notata	Anatidae	25.9714	32.3489	20.1045
Cygnus buccinator	Cygnus buccinator	Anatidae	-1.40226	21.0295	-23.0136
Dendroica caerulescens	Dendroica caerulescens	Anatidae	10.2499	28.0067	-8.03382
Dendroica castenea	Dendroica castanea	Anatidae	7.27887	27.4626	-14.2258
Dendroica cerulea	Dendroica cerulea	Anatidae	21.3077	28.3539	13.9121
Dendroica coronata	Dendroica coronata	Anatidae	-6.63727	13.3166	-25.2003
Dendroica discolor	Dendroica discolor	Anatidae	16.3212	31.7446	0.167634
Dendroica dominica	Dendroica dominica	Anatidae	20.0628	28.4021	11.3094
Dendroica fusca	Dendroica fusca	Anatidae	24.4491	31.7279	17.7139
Dendroica graciae	Dendroica graciae	Anatidae	14.2117	31.6152	-2.39325
Dendroica magnolia	Dendroica magnolia	Anatidae	0.498157	22.0296	-22.137
Dendroica nigrescens	Dendroica nigrescens	Anatidae	18.2202	33.2286	3.38209
Dendroica palmarum	Dendroica palmarum	Anatidae	-1.3473	20.818	-24.319
Dendroica petechia	Dendroica petechia	Anatidae	-1.75661	20.4801	-21.9447
Dendroica striata	Dendroica striata	Anatidae	17.8303	27.8779	7.76092
Dendroica tigrina	Dendroica tigrina	Anatidae	-5.14697	20.1748	-32.3653
Dendroica virens	Dendroica virens	Anatidae	18.3767	27.9376	8.42092
Hymenolaimus malacorhynchos	Hymenolaimus malacorhynchos	Anatidae	10.0001	20.5301	0.583192
Lophodytes cucullatus	Lophodytes cucullatus	Anatidae	6.85161	26.3174	-12.8216
Mergus serrator	Mergus serrator	Anatidae	-5.51763	19.2394	-29.1243
Oxyura jamaicensis	Oxyura jamaicensis	Anatidae	8.18149	26.185	-9.40367
Tadorna variegata	Tadorna variegata	Anatidae	10.523	20.7727	1.22507
Anhinga anhinga	Anhinga anhinga	Anhingidae	24.2543	32.3632	15.8822
Aeronautes saxatalis	Aeronautes saxatalis	Apodidae	13.2494	30.964	-2.57541
Chaetura pelagica	Chaetura pelagica	Apodidae	9.66314	29.1797	-10.5725
Collocalia esculenta	Collocalia esculenta	Apodidae	25.073	30.2777	20.2005
Collocalia vanikorensis	Collocalia vanikorensis	Apodidae	25.2448	30.5284	20.3499
Apteryx australis	Apteryx australis	Apterygidae	7.78197	17.9884	-1.18455
Apteryx haastii	Apteryx haastii	Apterygidae	8.72221	19.1127	-0.837379
Apteryx owenii	Apteryx owenii	Apterygidae	13.79	22.77	5.61
Aramus guarauna	Aramus guarauna	Aramidae	23.9197	32.2568	15.2481
Ardea herodias	Ardea herodias	Ardeidae	7.33161	27.2661	-12.4585
Butorides virescens	Butorides virescens	Ardeidae	21.2287	32.2284	9.56548
Nycticorax nycticorax	Nycticorax nycticorax	Ardeidae	18.5208	31.4982	5.30946
Bombycilla cedrorum	Bombycilla cedrorum	Bombycillidae	3.84505	24.7845	-16.9842
Aceros plicatus	Aceros plicatus	Bucerotidae	25.6001	30.6678	20.9289
Bycanistes bucinator	Bycanistes bucinator	Bucerotidae	22.2192	31.3954	11.6576
Cacatua roseicapilla	Cacatua roseicapilla	Cacatuidae	21.4929	35.1207	7.22206
Calcarius lapponicus	Calcarius lapponicus	Calcariidae	-11.5098	12.1343	-32.3569
Plectrophenax nivalis	Plectrophenax nivalis	Calcariidae	-10.5815	13.6152	-33.1358
Egretta [candidissima]	Egretta thula	Campephagidae	13.5809	28.1343	-1.00134
Caprimulgus europaeus	Caprimulgus europaeus	Caprimulgidae	6.44548	26.8454	-13.0802
Caprimulgus macrurus	Caprimulgus macrurus	Caprimulgidae	24.7206	32.3425	15.9229
Caprimulgus vociferus	Caprimulgus vociferus	Caprimulgidae	10.3217	28.8732	-8.91717
Chordeiles acutipennis	Chordeiles acutipennis	Caprimulgidae	23.6076	32.4421	14.6417
Chordeiles minor	Chordeiles minor	Caprimulgidae	6.10051	26.3948	-14.1529
Eurostopodus mystacalis	Eurostopodus mystacalis	Caprimulgidae	18.9313	30.7791	5.93383
Nyctidromus albicollis	Nyctidromus albicollis	Caprimulgidae	24.5901	32.016	16.958
Phalaenoptilus nuttallii	Phalaenoptilus nuttallii	Caprimulgidae	11.6282	31.35	-6.32783
Cardinalis cardinalis	Cardinalis cardinalis	Cardinalidae	12.6203	30.6127	-4.74875
Cardinalis sinuatus	Cardinalis sinuatus	Cardinalidae	18.2903	33.7815	2.01378
Passerina amoena	Passerina amoena	Cardinalidae	6.9632	28.2655	-10.7936
Passerina cyanea	Passerina cyanea	Cardinalidae	11.0516	30.3098	-8.52548
Pheucticus ludovicianus	Pheucticus ludovicianus	Cardinalidae	5.01186	25.8785	-16.6752
Pheucticus melanocephalus	Pheucticus melanocephalus	Cardinalidae	9.61537	29.2227	-7.61134
Piranga erythromelas	Piranga olivacea	Cardinalidae	8.82042	28.3416	-11.2672
Piranga hepatica	Piranga flava	Cardinalidae	21.3123	31.5189	10.7036
Piranga ludoviciana	Piranga ludoviciana	Cardinalidae	3.29206	24.2056	-16.1152
Piranga rubra	Piranga rubra	Cardinalidae	16.1758	32.9168	-1.25772
Spiza americana	Spiza americana	Cardinalidae	22.3855	30.6688	13.7308
Dromaius novaehollandiae	Dromaius novaehollandiae	Casuariidae	22.5852	36.266	8.026
Cathartes aura	Cathartes aura	Cathartidae	17.5875	30.1756	5.28324
Certhia familiaris	Certhia familiaris	Certhiidae	0.850782	22.8758	-21.0947
Charadrius alexandrinus	Charadrius alexandrinus	Charadriidae	15.958	31.4982	-0.0541145
Charadrius hiaticula	Charadrius hiaticula	Charadriidae	8.19021	25.9649	-9.1661
Charadrius montanus	Charadrius montanus	Charadriidae	11.2825	31.0284	-6.78517
Charadrius semipalmatus	Charadrius semipalmatus	Charadriidae	7.45665	24.1821	-8.7959
Charadrius vociferus	Charadrius vociferus	Charadriidae	7.61343	25.3285	-9.89931
Charadrius wilsonia	Charadrius wilsonia	Charadriidae	22.094	32.1676	11.9174
Pluvialis dominica	Pluvialis dominica	Charadriidae	-11.0138	13.6592	-33.4448
Pluvialis squatarola	Pluvialis squatarola	Charadriidae	-12.6006	12.5755	-34.5908
Vanellus vanellus	Vanellus vanellus	Charadriidae	2.94782	24.1888	-17.7027
Jabiru mycteria	Jabiru mycteria	Ciconiidae	24.3647	32.7461	15.6843
Leptoptilos javanicus	Leptoptilos javanicus	Ciconiidae	26.1259	32.7344	18.8525
Cinclus mexicanus	Cinclus mexicanus	Cinclidae	0.720776	21.2359	-17.7333
Cnemophilus loriae	Cnemophilus loriae	Cnemophilidae	16.3927	22.6913	10.4801
Cnemophilus macgregorii	Cnemophilus macgregorii	Cnemophilidae	21.4977	27.8835	15.6214
Colius colius	Colius colius	Coliidae	18.1946	30.9664	3.35375
Colius striatus	Colius striatus	Coliidae	22.9405	31.861	13.7128
Urocolius macrourus	Urocolius macrourus	Coliidae	25.858	36.5453	14.8473
Caloenas nicobarica	Caloenas nicobarica	Columbidae	25.814	30.8799	20.9638
Columba fasciata	Patagioenas fasciata	Columbidae	14.6237	28.5136	1.55821
Columba livia	Columba livia	Columbidae	15.8737	33.1951	-1.09237
Columba vitiensis	Columba vitiensis	Columbidae	24.363	29.7871	19.2382
Columbina inca	Columbina inca	Columbidae	19.3684	33.4636	4.68291
Columbina passerina	Columbina passerina	Columbidae	23.7499	32.5403	15.0435
Drepanoptila holosericea	Drepanoptila holosericea	Columbidae	21.9871	28.4627	15.0452
Ducula bicolor	Ducula bicolor	Columbidae	26.3127	31.6534	21.3084
Ducula pacifica	Ducula pacifica	Columbidae	24.4712	29.5343	19.6238
Ducula pinon	Ducula pinon	Columbidae	25.6474	30.8731	20.821
Ducula pistrinaria	Ducula pistrinaria	Columbidae	25.6234	29.9498	21.5372
Ducula rubricera	Ducula rubricera	Columbidae	25.5985	29.9006	21.5263
Ducula rufigaster	Ducula rufigaster	Columbidae	25.2867	30.5716	20.401
Ducula zoeae	Ducula zoeae	Columbidae	25.0272	30.3457	20.107
Gallicolumba beccarii	Gallicolumba beccarii	Columbidae	21.0075	26.4876	15.8935
Geopelia cuneata	Geopelia cuneata	Columbidae	23.0134	36.5992	8.05793
Geophaps plumifera	Geophaps plumifera	Columbidae	24.3739	37.9893	8.69472
Goura cristata	Goura cristata	Columbidae	25.7565	30.1423	21.8756
Gymnophaps albertisii	Gymnophaps albertisii	Columbidae	23.0583	28.3945	18.1183
Hemiphaga novaeseelandiae	Hemiphaga novaeseelandiae	Columbidae	10.9446	21.0056	1.8112
Leucosarcia melanoleuca	Leucosarcia melanoleuca	Columbidae	16.549	28.5204	3.91628
Ptilinopus melanospilus	Ptilinopus melanospilus	Columbidae	24.9423	30.5564	19.479
Ptilinopus superbus	Ptilinopus superbus	Columbidae	22.4277	30.0038	14.7525
Zenaida asiatica	Zenaida asiatica	Columbidae	20.4861	33.3194	7.21696
Aphelocoma coerulescens	Aphelocoma coerulescens	Corvidae	22.0575	32.8211	9.22846
Corvus brachyrhynchos	Corvus brachyrhynchos	Corvidae	5.28388	26.0613	-15.5441
Corvus caurinus	Corvus caurinus	Corvidae	3.93674	16.9292	-6.73908
Corvus corax	Corvus corax	Corvidae	-1.46685	21.0366	-22.8478
Corvus cryptoleucus	Corvus cryptoleucus	Corvidae	17.3634	33.6908	0.0835256
Cyanocitta cristata	Cyanocitta cristata	Corvidae	8.09193	27.9957	-12.5708
Cyanocitta stelleri	Cyanocitta stelleri	Corvidae	7.9106	25.8799	-7.58305
Gavia (arctica) pacifica	Gavia pacifica	Corvidae	-9.23291	15.0478	-31.7454
Gymnorhinus cyanocephalus	Gymnorhinus cyanocephalus	Corvidae	8.24114	29.7128	-9.95526
Nucifraga caryocatactes	Nucifraga caryocatactes	Corvidae	-2.79066	21.8763	-26.8327
Nucifraga columbiana	Nucifraga columbiana	Corvidae	5.81839	26.3959	-11.2968
Perisoreus canadensis	Perisoreus canadensis	Corvidae	-2.17049	20.4447	-25.03
Pica hudsonia	Pica hudsonia	Corvidae	1.46637	23.4436	-19.8642
Pica nuttalli	Pica nuttalli	Corvidae	14.0327	31.6383	0.895934
Pica pica	Pica pica	Corvidae	4.4742	25.1157	-15.6725
Poeciel (Parus) sclateri	Parus sclateri	Corvidae	16.847	29.6187	3.61803
Poecile (Parus) caeruleus	Parus caeruleus	Corvidae	7.83925	24.785	-7.19111
Poecile (Parus) palustris	Parus palustris	Corvidae	4.36349	23.6806	-15.2654
Domestic chicken	Gallus gallus	Cotingidae	23.6942	32.4096	13.3673
Domestic duck	Cairina moschata	Cotingidae	22.6699	31.0714	13.9123
Domestic goose	Anser anser	Cotingidae	11.6519	29.275	-5.93723
Domestic turkey	Meleagris gallopavo	Cotingidae	11.3069	30.4055	-7.2945
Crax rubra	Crax rubra	Cracidae	24.9318	32.1476	17.6508
Penelope purpuratus	Penelope purpurascens	Cracidae	24.4715	31.7527	17.095
Pipilo aberti	Pipilo aberti	Cracidae	19.7961	36.785	0.32564
Coccyzus americanus	Coccyzus americanus	Cuculidae	13.8255	31.3556	-4.22204
Coccyzus erythropthalmus	Coccyzus erythropthalmus	Cuculidae	7.59331	28.2461	-13.3299
Geococcyx californianus	Geococcyx californianus	Cuculidae	17.3386	33.8528	0.711503
Guira guira	Guira guira	Cuculidae	21.903	31.8643	11.692
Diomedea exulans	Diomedea exulans	Diomedeidae	12.9409	22.3667	4.48276
Diomedea immutabilis	Phoebastria immutabilis	Diomedeidae	9.88649	18.9865	1.33564
Diomedea nigripes	Phoebastria nigripes	Diomedeidae	8.75955	18.4986	-0.0380052
Emberiza citrinella	Emberiza citrinella	Emberizidae	2.38495	25.9683	-19.2374
Amadina fasciata	Amadina fasciata	Estrildidae	24.8886	35.9352	12.6057
Erythrura gouldiae	Erythrura gouldiae	Estrildidae	26.9718	36.9867	14.2656
Estrilda melpoda	Estrilda melpoda	Estrildidae	25.1635	32.832	17.5668
Estrilda troglodytes	Estrilda troglodytes	Estrildidae	26.9998	38.3597	15.1279
Lonchura cucullata	Lonchura cucullata	Estrildidae	23.2994	32.3488	13.6385
Taeniopygia guttata	Taeniopygia guttata	Estrildidae	21.9435	35.9558	7.04503
Daptrius ater	Daptrius ater	Falconidae	25.6751	32.4496	19.0146
Falco peregrinus	Falco peregrinus	Falconidae	-0.24789	21.7812	-20.846
Falco rupicoloides	Falco rupicoloides	Falconidae	20.0083	31.9052	6.04852
Falco sparvarius	Falco sparverius	Falconidae	11.1835	27.7222	-5.21107
Carduelis pinus	Carduelis pinus	Fringillidae	4.12075	24.4984	-16.2031
Carduelis tristis	Carduelis tristis	Fringillidae	7.38357	27.0351	-12.3304
Carpodacus cassinii	Carpodacus cassinii	Fringillidae	5.57597	26.7966	-11.5593
Carpodacus mexicanus	Carpodacus mexicanus	Fringillidae	12.5353	30.5563	-4.58737
Carpodacus purpureus	Carpodacus purpureus	Fringillidae	2.28838	22.7428	-18.6563
Fringilla coelebs	Fringilla coelebs	Fringillidae	10.7635	23.5424	-3.01163
Hesperiphona vespertina	Coccothraustes vespertinus	Fringillidae	6.69919	25.7712	-10.4297
Loxia curvirostra	Loxia curvirostra	Fringillidae	1.09818	22.9845	-20.5142
Loxia leucoptera	Loxia leucoptera	Fringillidae	-3.43839	21.1085	-27.6251
Pinicola enucleator	Pinicola enucleator	Fringillidae	-10.6783	18.6388	-37.5305
Thryomanes bewicki	Thryomanes bewickii	Furnariidae	14.5054	31.8021	-2.00119
Grus canadensis	Grus canadensis	Gruidae	-5.64794	17.5928	-27.8148
Grus paradisea	Grus paradisea	Gruidae	16.5476	29.0604	1.95325
Hirundo rustica	Hirundo rustica	Hirundinidae	4.17612	25.1839	-16.4103
Progne subis	Progne subis	Hirundinidae	11.0846	29.8671	-8.29505
Riparia riparia	Riparia riparia	Hirundinidae	-0.16475	23.1591	-22.5565
Stelgidopteryx serripennis	Stelgidopteryx serripennis	Hirundinidae	10.6015	29.3541	-7.32696
Tachycineta thalassina	Tachycineta thalassina	Hirundinidae	5.5225	25.2529	-12.1872
Agelaius phoeniceus	Agelaius phoeniceus	Icteridae	6.52873	26.5989	-13.3664
Agelaius tricolor	Agelaius tricolor	Icteridae	14.8938	32.0305	1.68044
Chrysonia oenone	Chrysuronia oenone	Icteridae	24.3296	30.7341	17.5467
Dolichonyx oryzivorus	Dolichonyx oryzivorus	Icteridae	5.3079	26.5574	-15.7664
Euphagus carolinus	Euphagus carolinus	Icteridae	-3.00138	19.7175	-26.0477
Euphagus cyanocephalus	Euphagus cyanocephalus	Icteridae	21.8303	31.1124	11.7011
Icteria virens	Icteria virens	Icteridae	26.4625	31.9875	20.5125
Icterus bullocki	Icterus bullockii	Icteridae	10.7006	30.5662	-6.67302
Icterus cucullatus	Icterus cucullatus	Icteridae	19.575	34.7655	5.05307
Icterus galbula	Icterus galbula	Icteridae	9.22894	29.1226	-10.0374
Icterus parisorum	Icterus parisorum	Icteridae	16.2552	32.5953	0.194563
Icterus spurius	Icterus spurius	Icteridae	13.0509	31.3022	-5.71924
Molothrus ater	Molothrus ater	Icteridae	8.71775	28.3476	-10.4855
Quiscalus major	Quiscalus major	Icteridae	19.2391	31.9809	4.99863
Quiscalus quiscula	Quiscalus quiscula	Icteridae	6.47276	27.1814	-14.9641
Sturnella neglecta	Sturnella neglecta	Icteridae	7.92304	28.4426	-11.3575
Xanthocephalus xanthocephalus	Xanthocephalus xanthocephalus	Icteridae	5.09866	26.9441	-15.707
Lanius collaris	Lanius collaris	Laniidae	20.9006	30.8406	9.53519
Lanius collurio	Lanius collurio	Laniidae	5.10138	25.255	-13.4621
Lanius excubitor	Lanius excubitor	Laniidae	4.54581	26.4893	-16.6882
Lanius ludovicianus	Lanius ludovicianus	Laniidae	11.5695	30.5923	-6.88912
Anous stolidus	Anous stolidus	Laridae	25.4836	31.4837	19.4681
Larus atricilla	Larus atricilla	Laridae	18.8482	31.0453	5.82469
Larus californicus	Larus californicus	Laridae	1.26317	24.2619	-22.1265
Larus canus	Larus canus	Laridae	-3.78193	20.5088	-26.552
Larus delawarensis	Larus delawarensis	Laridae	2.34132	24.1027	-19.4204
Larus dominicanus	Larus dominicanus	Laridae	12.87	23.4034	3.51239
Larus glaucescens	Larus glaucescens	Laridae	0.676861	16.0186	-12.6907
Larus glaucoides	Larus glaucoides	Laridae	-13.598	7.89023	-32.4465
Larus glaucus	Larus hyperboreus	Laridae	-13.1772	8.91943	-32.4529
Larus pacificus	Larus pacificus	Laridae	15.728	27.2395	5.9334
Larus philadelphia	Larus philadelphia	Laridae	-3.41255	20.2216	-27.4113
Larus pipixcan	Larus pipixcan	Laridae	1.73562	24.6639	-22.623
Rissa tridactyla	Rissa tridactyla	Laridae	-5.33246	11.4597	-20.4325
Rynchops niger	Rynchops niger	Laridae	24.0004	32.2182	15.6858
Sterna caspia	Sterna caspia	Laridae	15.2693	31.5077	-0.687886
Sterna forsteri	Sterna forsteri	Laridae	5.11343	27.1133	-16.7249
Sterna fuscata	Sterna fuscata	Laridae	25.5218	30.8445	20.4017
Sterna maxima	Sterna maxima	Laridae	22.3556	31.9749	12.6749
Sterna sandvichensis	Sterna sandvicensis	Laridae	17.8238	29.5883	6.829
Sterna vittata	Sterna vittata	Laridae	4.8231	11.627	-1.02155
Amphispiza belli	Amphispiza belli	Locustellidae	13.74	33.1643	-1.97691
Locustella naevia	Locustella naevia	Locustellidae	25.7217	40.786	11.7317
Trachyphonus darnaudii	Trachyphonus darnaudii	Lybiidae	24.6654	33.6582	16.5683
Malurus cyaneus	Malurus cyaneus	Maluridae	16.2468	29.4119	3.73355
Leipoa ocellata	Leipoa ocellata	Megapodiidae	17.6264	32.4352	4.82191
Melanocharis versteri	Melanocharis versteri	Melanocharitidae	18.0877	24.1155	12.4877
Toxorhamphus poliopterus	Toxorhamphus poliopterus	Melanocharitidae	23.7189	29.3523	18.4976
Ceryle (Megaceryle) alcyon	Megaceryle alcyon	Meliphagidae	2.68268	23.7525	-18.1383
Lichenostomus virescens	Lichenostomus virescens	Meliphagidae	21.5142	35.4256	6.94636
Lichmera indistincta	Lichmera indistincta	Meliphagidae	22.886	35.7558	8.64895
Melidectes belfordi	Melidectes belfordi	Meliphagidae	17.5854	23.7856	11.7897
Oreortyx picta	Oreortyx pictus	Meliphagidae	10.3145	28.9046	-3.13687
Ptiloprora guisei	Ptiloprora guisei	Meliphagidae	17.5369	23.8997	11.4543
Dumetella carolinensis	Dumetella carolinensis	Mimidae	25.8921	31.7688	19.4538
Melanotrochilus fuscus	Florisuga fusca	Mimidae	19.8857	29.1766	10.2974
Mimus polyglottos	Mimus polyglottos	Mimidae	11.6485	30.1451	-6.1387
Oreoscoptes montanus	Oreoscoptes montanus	Mimidae	21.752	32.3427	10.5587
Toxostoma crissale	Toxostoma crissale	Mimidae	18.1982	34.7901	1.48398
Toxostoma curvirostre	Toxostoma curvirostre	Mimidae	18.3088	33.4199	2.31184
Anthus cervinus	Anthus cervinus	Motacillidae	-10.4998	15.7526	-33.2534
Anthus pratensis	Anthus pratensis	Motacillidae	2.79881	20.6357	-13.3768
Anthus rubescens	Anthus rubescens	Motacillidae	-8.29775	15.9244	-31.1516
Anthus spinoletta	Anthus spinoletta	Motacillidae	2.37501	23.2152	-19.1381
Anthus spraguei	Anthus spragueii	Motacillidae	2.75495	25.7838	-21.102
Anthus trivialis	Anthus trivialis	Motacillidae	0.977085	22.8128	-19.5376
Motacilla alba	Motacilla alba	Motacillidae	0.069662	22.7476	-21.6661
Motacilla flava	Motacilla flava	Motacillidae	-1.19424	22.5698	-23.6606
Erithacus rubecula	Erithacus rubecula	Muscicapidae	18.9431	26.9422	12.3426
Ficedula hypoleuca	Ficedula hypoleuca	Muscicapidae	24.0803	36.4703	10.8768
Hydranassa tricolor	Egretta tricolor	Muscicapidae	23.1917	32.3784	13.4909
Luscinia svecica	Luscinia svecica	Muscicapidae	4.31972	25.5995	-16.178
Muscicapa parva	Ficedula parva	Muscicapidae	12.8668	31.0026	-4.60693
Muscicapa striata	Muscicapa striata	Muscicapidae	4.4154	24.1404	-14.1035
Oenanthe oenanthe	Oenanthe oenanthe	Muscicapidae	-1.44528	20.9839	-24.3243
Phoenicurus phoenicurus	Phoenicurus phoenicurus	Muscicapidae	9.0277	26.4471	-7.56045
Saxicola rubetra	Saxicola rubetra	Muscicapidae	3.6909	22.5981	-13.7543
Aethopyga christinae	Aethopyga christinae	Nectariniidae	18.2132	30.4495	5.12354
Anthreptes collaris	Anthreptes collaris	Nectariniidae	23.2807	31.5208	14.5429
Anthreptes orientalis	Anthreptes orientalis	Nectariniidae	24.8956	33.8618	16.7143
Nectarinia kilimensis	Nectarinia kilimensis	Nectariniidae	20.0128	28.1271	11.6724
Nectarinia minulla	Nectarinia minulla	Nectariniidae	24.6927	31.2861	18.5926
Nectarinia senegalensis	Nectarinia senegalensis	Nectariniidae	23.3027	33.1937	12.4694
Nectarinia verticalis	Nectarinia verticalis	Nectariniidae	24.4701	31.9956	17.135
Numida meleagris	Numida meleagris	Numididae	23.3137	33.3726	12.1435
Callipepla californica	Callipepla californica	Odontophoridae	10.4133	28.7748	-3.6024
Callipepla gambelii	Callipepla gambelii	Odontophoridae	16.9133	35.566	-0.564568
Colinus virginianus	Colinus virginianus	Odontophoridae	15.1406	32.0819	-2.4391
Pitohui nigrescens	Pitohui nigrescens	Oriolidae	24.0392	29.4843	18.9886
Chlamydotis undulata	Chlamydotis undulata	Otididae	16.2067	35.4367	-2.72785
Lobipes lobatus	Phalaropus lobatus	Otididae	-8.37423	15.0194	-29.691
Pachycephala schlegelii	Pachycephala schlegelii	Pachycephalidae	24.0418	29.4992	18.9783
Astrapia stephaniae	Astrapia stephaniae	Paradisaeidae	18.4856	24.9118	12.388
Cicinnurus magnificus	Cicinnurus magnificus	Paradisaeidae	23.5429	28.9313	18.5254
Cicinnurus regius	Cicinnurus regius	Paradisaeidae	25.8057	30.9245	21.0664
Epimachus meyeri	Epimachus meyeri	Paradisaeidae	17.9152	24.0725	12.165
Lophorina superba	Lophorina superba	Paradisaeidae	19.378	25.3322	13.8277
Manucodia chalybatus	Manucodia chalybatus	Paradisaeidae	23.5694	29.1407	18.5329
Manucodia keraudrenii	Manucodia keraudrenii	Paradisaeidae	24.7188	30.1518	19.6517
Paradisaea raggiana	Paradisaea raggiana	Paradisaeidae	24.0368	30.0223	18.6826
Paradisaea rudolphi	Paradisaea rudolphi	Paradisaeidae	19.5512	25.9587	13.4471
Parotia lawesii	Parotia lawesii	Paradisaeidae	19.5429	25.8656	13.4951
Parotia wahnesi	Parotia wahnesi	Paradisaeidae	21.0173	26.8023	15.5075
Parus gambeli	Parus gambeli	Paradisaeidae	5.61184	25.8475	-11.6257
Parus (Baeolophus) bicolor	Baeolophus bicolor	Paradisaeidae	13.4906	31.0231	-4.60145
Parus (Baeolophus) inornatus	Baeolophus inornatus	Paradisaeidae	14.2492	31.0666	1.33802
Parus (Baeolophus) wollweberi	Baeolophus wollweberi	Paradisaeidae	17.506	31.2064	3.53975
Parus atricapillus	Parus atricapillus	Paradisaeidae	2.63035	24.0039	-18.5904
Parus carolinensis	Parus carolinensis	Paradisaeidae	15.4721	32.3083	-2.12414
Parus cinctus	Parus cinctus	Paradisaeidae	-7.90332	19.548	-33.2179
Baeolophus ridgwayi	Baeolophus ridgwayi	Paridae	9.06529	30.3629	-9.17425
Cephus grylle	Cepphus grylle	Paridae	-5.13217	11.956	-20.6758
Geothlypis trichas	Geothlypis trichas	Parulidae	6.31934	26.481	-13.7698
Helmitherus vermivorus	Helmitheros vermivorum	Parulidae	17.3204	31.6954	2.49075
Mniotilta varia	Mniotilta varia	Parulidae	20.5852	30.337	10.3037
Oporornis formosus	Oporornis formosus	Parulidae	14.1073	31.4044	-3.82874
Oporornis philadelphia	Oporornis philadelphia	Parulidae	2.23197	23.6593	-20.6709
Oporornis tolmiei	Oporornis tolmiei	Parulidae	4.30914	23.4352	-11.9084
Seiurus aurocapillus	Seiurus aurocapilla	Parulidae	19.2676	26.2941	12.6324
Seiurus motacilla	Seiurus motacilla	Parulidae	17.2722	31.1386	2.98007
Seiurus noveboracensis	Seiurus noveboracensis	Parulidae	8.57213	26.1454	-9.52327
Setophaga ruticilla	Setophaga ruticilla	Parulidae	25.0308	30.3352	19.6995
Vermivora celata	Vermivora celata	Parulidae	4.9559	25.4595	-15.3491
Vermivora chrysoptera	Vermivora chrysoptera	Parulidae	25.6177	34.6181	16.8064
Vermivora luciae	Vermivora luciae	Parulidae	16.3597	33.12	-0.301237
Vermivora peregrina	Vermivora peregrina	Parulidae	5.74831	24.9621	-13.3067
Vermivora pinus	Vermivora pinus	Parulidae	16.0455	31.1414	0.492503
Vermivora virginiae	Vermivora virginiae	Parulidae	16.0144	32.2171	-0.164456
Aimophila ruficeps	Aimophila ruficeps	Passerellidae	15.6843	32.8096	-0.981035
Ammodramus henslowi	Ammodramus henslowii	Passerellidae	12.417	30.396	-6.12687
Ammodramus savannarum	Ammodramus savannarum	Passerellidae	8.20221	25.9078	-9.06621
Amphispiza bilineata	Amphispiza bilineata	Passerellidae	12.3623	31.52	-5.20531
Calamospiza melanocorys	Calamospiza melanocorys	Passerellidae	12.0397	31.4862	-7.09176
Junco hyemalis	Junco hyemalis	Passerellidae	22.2747	28.1232	16.1235
Junco phaeonotus	Junco phaeonotus	Passerellidae	16.463	29.2904	2.47479
Melospiza georgiana	Melospiza georgiana	Passerellidae	5.70066	26.2937	-15.9635
Melospiza lincolni	Melospiza lincolnii	Passerellidae	24.785	33.1036	15.9674
Melospiza melodia	Melospiza melodia	Passerellidae	4.15897	15.0885	-5.26923
Passerculus sandwichensis	Passerculus sandwichensis	Passerellidae	-5.43062	17.675	-27.8752
Passerella iliaca	Passerella iliaca	Passerellidae	-1.2349	21.5573	-26.4827
Peucedramus (olivaceus) taeniatus	Peucedramus taeniatus	Passerellidae	21.0807	31.545	1.56734
Pipilo crissalis	Pipilo crissalis	Passerellidae	15.8975	32.0739	2.95273
Pipilo erythrophtalmus	Pipilo erythrophthalmus	Passerellidae	9.41689	28.8128	-10.936
Pipilo fuscus	Pipilo fuscus	Passerellidae	16.4298	32.5139	-0.103622
Pipilo maculatus	Pipilo maculatus	Passerellidae	10.217	29.4027	-8.21625
Spizella breweri	Spizella breweri	Passerellidae	20.4956	35.9434	5.66264
Spizella pallida	Spizella pallida	Passerellidae	2.1	23.4	-19.6
Spizella passerina	Spizella passerina	Passerellidae	18.5139	25.2444	12.5083
Spizella pusilla	Spizella pusilla	Passerellidae	23.8	34.9	10.3
Zonotrichia albicollis	Zonotrichia albicollis	Passerellidae	-0.92847	21.5312	-24.7235
Zonotrichia coronata	Zonotrichia atricapilla	Passerellidae	-3.34489	17.1412	-22.5539
Zonotrichia leucophrys	Zonotrichia leucophrys	Passerellidae	-4.39887	18.6225	-26.3314
Zonotrichia querula	Zonotrichia querula	Passerellidae	-10.7316	15.1971	-35.0273
Passer domesticus	Passer domesticus	Passeridae	6.43985	27.23	-13.6039
Pelecanus erythrorhynchos	Pelecanus erythrorhynchos	Pelecanidae	3.1514	25.8254	-19.9327
Pelecanus occidentalis	Pelecanus occidentalis	Pelecanidae	23.7673	32.182	14.7951
Peneothello sigillata	Peneothello sigillatus	Petroicidae	16.3767	22.6352	10.5262
Phalacrocorax auritus	Phalacrocorax auritus	Phalacrocoracidae	6.15522	26.0789	-13.426
Phalacrocorax carbo	Phalacrocorax carbo	Phalacrocoracidae	14.5758	30.1347	-1.78132
Phalacrocorax pelagicus	Phalacrocorax pelagicus	Phalacrocoracidae	-2.43698	15.5353	-19.4511
Alectoris chukar	Alectoris chukar	Phasianidae	7.47891	28.2188	-13.6155
Ammoperdix heyi	Ammoperdix heyi	Phasianidae	23.4499	37.3247	8.7611
Coturnix pectoralis	Coturnix pectoralis	Phasianidae	20.6391	34.9236	6.04409
Lagopus lagopus	Lagopus lagopus	Phasianidae	-6.49463	18.4172	-29.7756
Lagopus leucura	Lagopus leucura	Phasianidae	-1.31153	18.4459	-19.6221
Lagopus muta	Lagopus muta	Phasianidae	-10.0368	14.4898	-32.4297
Phasianus colchicus	Phasianus colchicus	Phasianidae	7.95057	27.456	-13.0461
Syrmaticus ellioti	Syrmaticus ellioti	Phasianidae	16.8787	31.5259	1.89094
Syrmaticus humiae	Syrmaticus humiae	Phasianidae	18.5355	27.9826	5.01575
Phoenicopterus antiquorum	Phoenicopterus roseus	Phoenicopteridae	20.4537	31.2458	8.6529
Phoeniculus purpureus	Phoeniculus purpureus	Phoeniculidae	23.9278	34.3885	12.2264
Phylloscopus collybita	Phylloscopus collybita	Phylloscopidae	-1.446	22.1328	-23.2611
Phylloscopus sibilatrix	Phylloscopus sibilatrix	Phylloscopidae	5.06033	23.4246	-11.8788
Phylloscopus trochilus	Phylloscopus trochilus	Phylloscopidae	-3.0724	21.2612	-25.4698
Picoides albolarvatus	Picoides albolarvatus	Picathartidae	8.3077	27.9797	-6.10764
Colaptes auratus	Colaptes auratus	Picidae	3.67756	24.6232	-17.0285
Dryocopus pileatus	Dryocopus pileatus	Picidae	6.33931	25.8426	-13.6673
Melanerpes carolinus	Melanerpes carolinus	Picidae	13.5649	31.1847	-4.80105
Melanerpes erythrocephalus	Melanerpes erythrocephalus	Picidae	10.3463	30.0313	-9.59016
Melanerpes formicivorus	Melanerpes formicivorus	Picidae	17.5172	30.7048	5.03888
Melanerpes lewisi	Melanerpes lewis	Picidae	6.38591	26.8582	-10.6045
Melanerpes uropygialis	Melanerpes uropygialis	Picidae	20.5726	35.9289	5.43803
Picoides arcticus	Picoides arcticus	Picidae	-0.77513	21.4489	-23.2259
Picoides arizonae	Picoides arizonae	Picidae	17.5933	31.5776	3.2413
Picoides borealis	Picoides borealis	Picidae	17.3226	32.7235	0.876713
Picoides nuttalli	Picoides nuttallii	Picidae	13.7681	31.1441	0.563403
Picoides pubescens	Picoides pubescens	Picidae	4.19434	24.9884	-16.3128
Picoides scalaris	Picoides scalaris	Picidae	19.389	33.8174	4.48689
Picoides tridactylus	Picoides tridactylus	Picidae	-2.97698	21.0652	-26.4968
Picoides villosus	Picoides villosus	Picidae	4.19268	24.8339	-16.2265
Sphyrapicus ruber	Sphyrapicus ruber	Picidae	4.48072	20.7455	-9.33055
Sphyrapicus thyroideus	Sphyrapicus thyroideus	Picidae	6.17598	27.1101	-11.3742
Sphyrapicus varius	Sphyrapicus varius	Picidae	0.266761	22.8534	-23.7149
Manacus vitellinus	Manacus vitellinus	Pipridae	25.7774	31.0024	21.025
Pipra mentalis	Pipra mentalis	Pipridae	25.0022	31.9667	18.1854
Pitta versicolor	Pitta versicolor	Pittidae	20.3189	30.2803	8.7659
Podargus papuansis	Podargus papuensis	Podargidae	24.5472	30.4209	18.7684
Podargus strigoides	Podargus strigoides	Podargidae	21.4626	35.056	7.21407
Aechmophorus occidentalis	Aechmophorus occidentalis	Podicipedidae	6.43977	27.3559	-12.8368
Podiceps caspicus	Podiceps auritus	Podicipedidae	-2.29954	21.654	-25.9003
Podiceps nigricollis	Podiceps nigricollis	Podicipedidae	6.62073	26.6543	-12.8875
Podilymbus podiceps	Podilymbus podiceps	Podicipedidae	12.6161	28.7632	-3.47886
Tachycineta (Iridiprocne) bicolor	Tachycineta bicolor	Podicipedidae	0.880602	22.7735	-20.7753
Polioptila caerulea	Polioptila caerulea	Polioptilidae	14.6248	31.5068	-2.18913
Polioptila plumbea	Polioptila plumbea	Polioptilidae	25.636	32.1542	19.6067
Bulweria bulwerii	Bulweria bulwerii	Procellariidae	24.8998	31.4822	18.4771
Daption capensis	Daption capense	Procellariidae	12.3187	20.985	4.49761
Fulmarus glacialis	Fulmarus glacialis	Procellariidae	-3.61303	12.5982	-18.2633
Macronectes giganteus	Macronectes giganteus	Procellariidae	10.9068	19.6367	3.18287
Pachyptila turtur	Pachyptila turtur	Procellariidae	12.334	21.8313	3.61876
Pagodroma nivea	Pagodroma nivea	Procellariidae	3.32576	10.1852	-2.91528
Procellaria aequinoctialis	Procellaria aequinoctialis	Procellariidae	11.3971	20.0708	3.7518
Pterodroma hypoleuca	Pterodroma hypoleuca	Procellariidae	14.9838	26.6459	3.07476
Puffinus nativitatis	Puffinus nativitatis	Procellariidae	25.4568	29.9748	21.0735
Puffinus pacificus	Puffinus pacificus	Procellariidae	24.5729	31.2494	17.5851
Puffinus teniurostris	Puffinus tenuirostris	Procellariidae	9.0427	20.66	-1.492
Prunella modularis	Prunella modularis	Prunellidae	4.57656	21.5735	-10.7263
Agapornis fischeri	Agapornis fischeri	Psittacidae	20.2146	28.0045	12.5467
Agapornis nigrigenis	Agapornis nigrigenis	Psittacidae	21.6435	34.4253	6.017
Agapornis personatus	Agapornis personatus	Psittacidae	21.0497	29.3734	12.2172
Agapornis pullanius	Agapornis pullarius	Psittacidae	24.8008	33.2886	16.7143
Agapornis roseicollis	Agapornis roseicollis	Psittacidae	20.54	31.9197	6.55019
Amazona viridigenalis	Amazona viridigenalis	Psittacidae	23.5016	33.9344	11.3119
Bolborhynchus lineola	Bolborhynchus lineola	Psittacidae	18.6069	26.022	10.9647
Cyanoliseus patagonus	Cyanoliseus patagonus	Psittacidae	13.9156	29.2683	0.0561272
Cyanoramphus auriceps	Cyanoramphus auriceps	Psittacidae	8.8827	19.1162	-0.357351
Cyanoramphus novaezelandiae	Cyanoramphus novaezelandiae	Psittacidae	11.127	21.127	1.99727
Cyanoramphus unicolor	Cyanoramphus unicolor	Psittacidae	9.35	16.25	3.1
Melopsittacus undulatus	Melopsittacus undulatus	Psittacidae	21.8462	36.3294	6.72509
Myiopsitta monachus	Myiopsitta monachus	Psittacidae	19.0702	32.0023	6.80884
Neophema pulchella	Neophema pulchella	Psittacidae	16.2143	30.1935	2.92727
Neophema splendida	Neophema splendida	Psittacidae	18.9173	34.3012	4.63318
Phainopepla nitens	Phainopepla nitens	Ptiliogonatidae	17.961	34.137	2.4501
Aimophila aestivalis	Aimophila aestivalis	Ptilonorhynchidae	16.2338	32.187	-0.680277
Pycnonotus sinensis	Pycnonotus sinensis	Pycnonotidae	15.7074	30.1174	0.16635
Aramides cajanea	Aramides cajanea	Rallidae	24.5054	32.1692	16.6757
Coturnix chinensis	Coturnix chinensis	Rallidae	23.5292	32.1673	14.0167
Fulica americana	Fulica americana	Rallidae	8.06564	27.6978	-11.2552
Fulica atra	Fulica atra	Rallidae	7.88374	27.9919	-12.133
Gallirallus australis	Gallirallus australis	Rallidae	9.89688	19.6488	0.807966
Gallirallus owstoni	Gallirallus owstoni	Rallidae	26.7476	30.3857	23.119
Gallirallus philippensis	Gallirallus philippensis	Rallidae	21.3951	29.5655	13.6711
Megacrex inepta	Megacrex inepta	Rallidae	26.3949	31.7942	21.3568
Porphyrio hochstetteri	Porphyrio hochstetteri	Rallidae	7.25793	18.0234	-1.87379
Porphyrio porphyrio	Porphyrio porphyrio	Rallidae	22.6163	33.3352	10.9376
Rallus virginianus	Rallus limicola	Rallidae	6.64665	27.1838	-12.8108
Aulacorhynchus prasinus	Aulacorhynchus prasinus	Ramphastidae	21.5932	28.9533	13.8655
Aulacorhynchus sulcatus	Aulacorhynchus sulcatus	Ramphastidae	21.422	27.5532	14.8057
Pteroglossus aracari	Pteroglossus aracari	Ramphastidae	25.0359	32.1658	18.2022
Pteroglossus bailloni	Pteroglossus bailloni	Ramphastidae	20.064	29.0267	9.99009
Ramphastos dicolorus	Ramphastos dicolorus	Ramphastidae	20.5427	29.6799	10.2253
Ramphastos toco	Ramphastos toco	Ramphastidae	23.239	31.8509	13.6634
Ramphastos tucanus	Ramphastos tucanus	Ramphastidae	25.6467	32.4901	18.8726
Selenidera maculirostris	Selenidera maculirostris	Ramphastidae	20.172	28.8255	10.3114
Himantopus mexicanus	Himantopus mexicanus	Recurvirostridae	15.9181	31.3326	0.155937
Recurvirostra americana	Recurvirostra americana	Recurvirostridae	7.72804	28.9551	-11.8717
Regulus calendula	Regulus calendula	Regulidae	-0.94514	21.177	-22.8694
Regulus regulus	Regulus regulus	Regulidae	3.65155	22.7539	-14.7672
Regulus satrapa	Regulus satrapa	Regulidae	2.40864	22.8106	-17.6922
Auriparus flaviceps	Auriparus flaviceps	Remizidae	18.6822	34.4706	2.48505
Rhipidura albolimbata	Rhipidura albolimbata	Rhipiduridae	18.158	24.213	12.5153
Rhipidura atra	Rhipidura atra	Rhipiduridae	19.9532	25.8129	14.5148
Arenaria interpres	Arenaria interpres	Scolopacidae	-13.3682	8.85201	-32.6828
Calidris alba	Calidris alba	Scolopacidae	-16.0888	6.85774	-35.6635
Calidris alpina	Calidris alpina	Scolopacidae	-8.9366	14.3024	-29.2991
Calidris bairdii	Calidris bairdii	Scolopacidae	-14.0244	9.99501	-34.9864
Calidris canutus	Calidris canutus	Scolopacidae	-16.359	6.99778	-36.1007
Calidris ferruginea	Calidris ferruginea	Scolopacidae	-13.5844	13.2603	-36.6462
Calidris himantopus	Calidris himantopus	Scolopacidae	-12.0078	13.0578	-34.6562
Calidris mauri	Calidris mauri	Scolopacidae	-4.85278	13.6913	-21.728
Calidris melanotus	Calidris melanotos	Scolopacidae	-13.0425	12.6263	-35.5769
Calidris minutilla	Calidris minutilla	Scolopacidae	-6.33213	16.8166	-28.6486
Calidris ruficollis	Calidris ruficollis	Scolopacidae	-12.4642	13.4339	-34.7372
Gallinago gallinago	Gallinago gallinago	Scolopacidae	-2.57219	21.1928	-25.2229
Limnodromus griseus	Limnodromus griseus	Scolopacidae	-1.66045	20.8635	-25.9368
Limosa fedoa	Limosa fedoa	Scolopacidae	3.30549	26.2091	-20.2538
Limosa haemastica	Limosa haemastica	Scolopacidae	-5.7216	17.1343	-27.4478
Limosa lapponica	Limosa lapponica	Scolopacidae	-10.0455	15.4094	-32.052
Limosa limosa	Limosa limosa	Scolopacidae	1.78724	23.3476	-18.6533
Numenius americanus	Numenius americanus	Scolopacidae	6.50246	28.2321	-12.2801
Numenius arquata	Numenius arquata	Scolopacidae	1.18738	22.9547	-19.675
Numenius phaeopus	Numenius phaeopus	Scolopacidae	-3.33104	18.2918	-22.9984
Phalaropus tricolor	Steganopus tricolor	Scolopacidae	3.71158	25.4649	-16.9249
Tringa flavipes	Tringa flavipes	Scolopacidae	-4.75674	19.1718	-28.4642
Tringa glareola	Tringa glareola	Scolopacidae	-4.3108	21.1334	-28.3292
Tringa macularia	Actitis macularius	Scolopacidae	0.86028	22.6707	-20.5508
Tringa melanoleucus	Tringa melanoleuca	Scolopacidae	-1.14077	19.709	-22.789
Tringa solitaria	Tringa solitaria	Scolopacidae	-3.18176	20.0124	-26.7554
Tringa totanus	Tringa totanus	Scolopacidae	4.55081	24.3111	-14.8427
Sitta carolinensis	Sitta carolinensis	Sittidae	2.42703	23.1221	-17.9859
Sitta pusilla	Sitta pusilla	Sittidae	17.7227	32.6841	1.5835
Eudyptula minor	Eudyptula minor	Spheniscidae	13.4202	22.9121	4.77679
Megadyptes antipodes	Megadyptes antipodes	Spheniscidae	10.2398	19.1881	1.59211
Pygoscelis adeliae	Pygoscelis adeliae	Spheniscidae	9.61818	16.4909	3.39091
Pygoscelis papua	Pygoscelis papua	Spheniscidae	7.49857	18.1426	-1.5864
Catharacta skua	Catharacta skua	Stercorariidae	2.54341	12.2872	-5.7572
Aegolius acadicus	Aegolius acadicus	Strigidae	4.65609	24.4543	-14.5032
Aegolius funereus	Aegolius funereus	Strigidae	-2.70971	21.3861	-26.3415
Asio flammeus	Asio flammeus	Strigidae	-0.81429	22.0651	-22.6605
Asio otus	Asio otus	Strigidae	2.89841	24.8162	-18.5935
Athene cuncularia	Athene cunicularia	Strigidae	15.577	29.9794	1.60159
Bubo virginianus	Bubo virginianus	Strigidae	8.77395	26.4729	-8.89344
Bubulcus (Ardeola) ibis	Bubulcus ibis	Strigidae	17.8985	30.5138	5.55513
Glaucidium gnoma	Glaucidium gnoma	Strigidae	18.4109	31.0018	5.61687
Megascops asio	Megascops asio	Strigidae	12.3395	30.9927	-6.70937
Megascops trichopsis	Megascops trichopsis	Strigidae	18.1818	30.3069	5.63463
Micrathene whitneyi	Micrathene whitneyi	Strigidae	19.2035	35.5029	2.6356
Otus flammeolus	Otus flammeolus	Strigidae	11.1006	28.973	-4.30774
Otus leucotis	Otus leucotis	Strigidae	23.9368	40.1545	6.29583
Ptiloris magnificus	Ptiloris magnificus	Strigidae	25.0601	30.4041	20.0662
Strix aluco	Strix aluco	Strigidae	8.97691	25.7588	-7.15278
Strix occidentalis	Strix occidentalis	Strigidae	12.145	29.004	-2.80206
Nestor meridionalis	Nestor meridionalis	Strigopidae	10.203	20.3455	1.05616
Nestor notabilis	Nestor notabilis	Strigopidae	8.24677	18.7856	-1.23101
Struthio camelus	Struthio camelus	Struthionidae	18.681	31.3973	3.8754
Acridotheres cristatellus	Acridotheres cristatellus	Sturnidae	17.44	29.8541	3.66701
Onychognathus morio	Onychognathus morio	Sturnidae	21.8805	32.1779	10.4909
Onychognathus tristramii	Onychognathus tristramii	Sturnidae	22.1222	34.5242	8.81586
Sturnus vulgaris	Sturnus vulgaris	Sturnidae	13.7425	31.3436	-3.48061
Morus bassanus	Morus bassanus	Sulidae	8.34373	21.2809	-3.40605
Sula dactylatra	Sula dactylatra	Sulidae	25.9187	32.1058	19.5715
Chamaea fasicata	Chamaea fasciata	Sylviidae	13.3759	29.5713	1.24971
Sylvia atricapilla	Sylvia atricapilla	Sylviidae	24.4369	39.2942	9.35596
Sylvia borin	Sylvia borin	Sylviidae	22.8764	34.307	10.2713
Sylvia communis	Sylvia communis	Sylviidae	14.7907	32.1597	-3.70739
Sylvia curruca	Sylvia curruca	Sylviidae	14.4318	31.405	-3.62652
Sylvia nisoria	Sylvia nisoria	Sylviidae	14.8049	31.6511	-3.04581
Hylophylax naevioides	Hylophylax naevioides	Thamnophilidae	25.1879	30.6981	20.0984
Wilsonia canadensis	Wilsonia canadensis	Thamnophilidae	10.9713	28.0128	-6.96494
Wilsonia citrina	Wilsonia citrina	Thamnophilidae	21.3809	32.6301	9.48123
Wilsonia pusilla	Wilsonia pusilla	Thamnophilidae	4.34036	24.7231	-15.7793
Thinocorus rumicivorus	Thinocorus rumicivorus	Thinocoridae	9.22249	19.977	-0.859651
Coereba flaveola	Coereba flaveola	Thraupidae	23.8407	30.5265	16.6775
Cyanerpes cyaneus	Cyanerpes cyaneus	Thraupidae	25.5683	32.4681	18.704
Porphyrospiza caerulescens	Porphyrospiza caerulescens	Thraupidae	23.7617	31.8842	14.2728
Sporophila corvina	Sporophila corvina	Thraupidae	24.535	30.8948	18.5147
Botarurus lentiginosus	Botaurus lentiginosus	Threskiornithidae	6.28045	25.9566	-13.557
Eudocimus albus	Eudocimus albus	Threskiornithidae	24.3762	33.2077	15.0824
Nothoprocta perdicaria	Nothoprocta perdicaria	Tinamidae	12.62	24.2331	3.90406
Nothura maculosa	Nothura maculosa	Tinamidae	19.9413	30.979	8.91252
Todus mexicanus	Todus mexicanus	Todidae	24.5	30.8774	17.3459
Amazilia versicolor	Amazilia versicolor	Trochilidae	24.0236	31.7671	15.7541
Aphantochroa cirrochloris	Aphantochroa cirrochloris	Trochilidae	21.7503	29.494	12.8074
Archilochus alexandri	Archilochus alexandri	Trochilidae	12.0718	31.3656	-4.91235
Archilochus colubris	Archilochus colubris	Trochilidae	8.99639	28.1915	-11.087
Calypte anna	Calypte anna	Trochilidae	14.2163	31.2236	0.616637
Colibri serrirostris	Colibri serrirostris	Trochilidae	22.3861	30.4261	12.5781
Cynanthus latirostris	Cynanthus latirostris	Trochilidae	19.2602	31.9519	5.86801
Eupetomena macroura	Eupetomena macroura	Trochilidae	23.7477	31.6448	14.9171
Hylocharis cyanus	Hylocharis cyanus	Trochilidae	25.3216	32.2587	18.3235
Lampornis clemenciae	Lampornis clemenciae	Trochilidae	17.4076	30.7179	3.63614
Oreotrochilus estella	Oreotrochilus estella	Trochilidae	8.70464	19.3025	-4.61424
Polytmus guainumbi	Polytmus guainumbi	Trochilidae	24.6571	32.3023	16.3849
Selasphorus platycercus	Selasphorus platycercus	Trochilidae	12.2099	30.0031	-3.96651
Selasphorus rufus	Selasphorus rufus	Trochilidae	2.88	21.2458	-12.4347
Stercorarius (Catharacta) chilensis	Catharacta chilensis	Trochilidae	6.92093	15.3526	-0.0413085
Stercorarius (Catharacta) maccormicki	Catharacta maccormicki	Trochilidae	1.49157	13.1132	-8.62592
Thalurania furcata	Thalurania furcata	Trochilidae	24.8867	32.4102	17.0106
Urosticte benjamini	Urosticte benjamini	Trochilidae	19.449	25.3332	13.8195
Campylorynchus brunneicappillus	Campylorhynchus brunneicapillus	Troglodytidae	18.5464	34.3162	2.42942
Catherpes mexicanus	Catherpes mexicanus	Troglodytidae	12.5893	31.0519	-3.98669
Catoptrophorus semipalmatus	Catoptrophorus semipalmatus	Troglodytidae	8.65818	28.272	-9.98441
Cistothorus palustris	Cistothorus palustris	Troglodytidae	6.41495	27.3959	-13.6147
Thryothorus ludovicianus	Thryothorus ludovicianus	Troglodytidae	15.5531	31.867	-1.48748
Troglodytes aedon	Troglodytes aedon	Troglodytidae	16.7503	29.4157	4.47391
Troglodytes troglodytes	Troglodytes troglodytes	Troglodytidae	4.71753	23.4401	-14.0491
Catharus fuscescens	Catharus fuscescens	Turdidae	3.93777	24.7151	-16.4188
Catharus guttatus	Catharus guttatus	Turdidae	1.22611	22.3518	-19.7766
Catharus minimus	Catharus minimus	Turdidae	-6.63072	17.0625	-29.1634
Catharus ustulatus	Catharus ustulatus	Turdidae	-0.66618	21.1564	-22.4895
Hylocichla mustelina	Hylocichla mustelina	Turdidae	11.765	29.8676	-7.01649
Myadestes townsendi	Myadestes townsendi	Turdidae	1.8043	22.9703	-17.1555
Sialia currucoides	Sialia currucoides	Turdidae	17.6	24.4	11.7
Sialia mexicana	Sialia mexicana	Turdidae	12.8412	30.5574	-3.0912
Sialia sialis	Sialia sialis	Turdidae	25.7611	31.6167	19.8722
Turdus iliacus	Turdus iliacus	Turdidae	-11.9578	17.8097	-38.0404
Turdus migratorius	Turdus migratorius	Turdidae	-0.00432	15.5781	-13.6459
Turdus philomelus	Turdus philomelos	Turdidae	10.2587	27.5884	-6.86823
Turdus poliocephalus	Turdus poliocephalus	Turdidae	24.7369	33.2837	15.6702
Turnix suscitator	Turnix suscitator	Turnicidae	24.1656	33.5995	13.5394
Contopus cooperi	Contopus cooperi	Tyrannidae	12.4589	22.1587	0.796166
Contopus pertinax	Contopus pertinax	Tyrannidae	18.2699	31.2343	5.0795
Contopus sordidulus	Contopus sordidulus	Tyrannidae	21.6392	32.5432	10.3565
Contopus virens	Contopus virens	Tyrannidae	11.7638	20.8545	0.565264
Dendragapus canadensis	Dendragapus canadensis	Tyrannidae	-2.88129	19.8928	-25.8291
Empidonax difficilis	Empidonax difficilis	Tyrannidae	5.60373	21.0798	-6.73201
Empidonax flaviventris	Empidonax flaviventris	Tyrannidae	-0.41998	21.7976	-24.1061
Empidonax hammondi	Empidonax hammondii	Tyrannidae	1.65249	22.585	-16.4739
Empidonax minimus	Empidonax minimus	Tyrannidae	1.25409	23.4023	-21.6163
Empidonax trailli	Empidonax traillii	Tyrannidae	8.42592	28.3752	-10.0603
Empidonax virescens	Empidonax virescens	Tyrannidae	13.72	31.337	-4.57323
Empidonax wrighti	Empidonax wrightii	Tyrannidae	7.76108	29.3438	-9.99218
Myiarchus cinerascens	Myiarchus cinerascens	Tyrannidae	13.9272	32.2352	-2.85011
Myiarchus tuberculifer	Myiarchus tuberculifer	Tyrannidae	24.454	31.94	16.9245
Philomachus pugnax	Philomachus pugnax	Tyrannidae	-4.78551	18.9893	-26.1159
Pyrocephalus rubinus	Pyrocephalus rubinus	Tyrannidae	15.647	30.7493	2.50322
Sayornis nigricans	Sayornis nigricans	Tyrannidae	21.3154	29.1053	12.7919
Sayornis phoebe	Sayornis phoebe	Tyrannidae	13.5215	29.6165	-2.47722
Tyrannus tyrannus	Tyrannus tyrannus	Tyrannidae	6.09472	26.7112	-14.6599
Tyrannus verticalis	Tyrannus verticalis	Tyrannidae	9.04108	29.7772	-9.76265
Tyrannus vociferans	Tyrannus vociferans	Tyrannidae	15.5664	31.6678	-0.164946
Tyto alba	Tyto alba	Tytonidae	20.3416	32.1382	8.34278
Padda oryzivora	Padda oryzivora	Vireonidae	25.1548	31.1901	18.9907
Vireo belli	Vireo bellii	Vireonidae	14.8121	33.2112	-3.95207
Vireo flavifrons	Vireo flavifrons	Vireonidae	11.5239	29.9409	-7.53093
Vireo gilvus	Vireo gilvus	Vireonidae	6.78689	27.637	-13.5382
Vireo griseus	Vireo griseus	Vireonidae	15.4485	32.0241	-1.97948
Vireo huttoni	Vireo huttoni	Vireonidae	15.2037	29.3541	2.1778
Vireo olivaceus	Vireo olivaceus	Vireonidae	9.35404	27.8187	-9.41501
Vireo philadelphia	Vireo philadelphicus	Vireonidae	0.967067	22.7896	-22.4359
Vireo solitarius	Vireo solitarius	Vireonidae	1.21539	23.2473	-22.5344
Zenaida (Zeniadura) macroura	Zenaida macroura	Zeledoniidae	10.3632	29.3234	-8.09951
Zosterops lateralis	Zosterops lateralis	Zosteropidae	18.5387	25.9418	11.6808
Sitta canadensis	Sitta canadensis	Sittidae	9.42333	28.7549	-9.16211

## Sheet: Mammals
Species	Species name in tree	Family	Bio1	Bio5	Bio6
Caenolestes (obscurus) fuliginosus	Caenolestes fuliginosus	Caenolestidae	14.4942	20.2591	8.91241
Caluromys derbianus	Caluromys derbianus	Didelphidae	24.0252	30.9748	17.3626
Fossa fossana	Fossa fossana	Eupleridae	20.6259	28.3522	12.1749
Galago senegalensis	Galago senegalensis	Galagidae	25.5269	35.8653	14.9826
Ailurus fulgens	Ailurus fulgens	Ailuridae	5.77027	18.1521	-10.5875
Aotus trivirgatus	Aotus trivirgatus	Aotidae	26.2769	32.5045	20.727
Aplodontia rufa	Aplodontia rufa	Aplodontiidae	7.49369	23.638	-3.9217
Balaenoptera physalus	Balaenoptera physalus	Balaenopteridae	11.2262	24.4309	-1.21577
Bathyergus janetta	Bathyergus janetta	Bathyergidae	17.1649	27.6121	6.66786
Bathyergus suillus	Bathyergus suillus	Bathyergidae	16.5131	27.5429	6.15768
Cryptomys (hottentotus) amatus	Cryptomys hottentotus	Bathyergidae	16.6023	28.5255	2.91687
Cryptomys amatus	Cryptomys amatus	Bathyergidae	21.6125	31.625	9.575
Cryptomys bocagei	Cryptomys bocagei	Bathyergidae	20.5333	29.2667	9.77778
Cryptomys damarensis	Cryptomys damarensis	Bathyergidae	20.5875	33.025	5.2375
Cryptomys darlingi	Cryptomys darlingi	Bathyergidae	21.4	29.95	9.4
Cryptomys mechowi	Cryptomys mechowi	Bathyergidae	21.5297	31.1317	9.84837
Georychus capensis	Georychus capensis	Bathyergidae	16.1671	27.2036	4.83253
Heliophobius argenteocinereus	Heliophobius argenteocinereus	Bathyergidae	22.6943	31.2359	13.3807
Hemiechinus auritus	Hemiechinus auritus	Bathyergidae	8.29314	30.5937	-13.6707
Heterocephalus glaber	Heterocephalus glaber	Bathyergidae	25.7327	34.9387	16.9162
Bos taurus	Bos taurus	Bovidae	18.7656	31.0705	6.37414
Bubalus bubalis	Bubalus bubalis	Bovidae	25.5337	34.665	14.6677
Capra hircus	Capra hircus	Bovidae	16.2944	30.8901	3.33867
Kobus ellipsiprymnus	Kobus ellipsiprymnus	Bovidae	24.0433	33.6902	13.8918
Madoqua kirkii	Madoqua kirkii	Bovidae	22.2009	31.1118	12.5891
Malacothrix typica	Malacothrix typica	Bovidae	18.5275	32.0843	2.85564
Manis crassicaudata	Manis crassicaudata	Bovidae	25.8974	38.9693	11.9849
Manis javanica	Manis javanica	Bovidae	25.2064	31.6365	18.4678
Manis pentadactyla	Manis pentadactyla	Bovidae	18.3943	29.7257	4.79534
Manis tetradactyla	Manis tetradactyla	Bovidae	24.7386	31.2558	18.6635
Manis tricuspis	Manis tricuspis	Bovidae	24.4177	31.9769	16.8658
Philantomba monticola	Philantomba monticola	Bovidae	23.0713	30.9134	14.5767
Phodopus sungorus	Phodopus sungorus	Bovidae	1.82448	26.2146	-21.6413
Rattus fuscipes	Rattus fuscipes	Bovidae	15.6218	27.439	4.78585
Bradypus tridactylus	Bradypus tridactylus	Bradypodidae	26.1006	32.5193	21.0431
Bradypus variegatus	Bradypus variegatus	Bradypodidae	24.7789	31.9063	17.3571
Acrobates pygmaeus	Acrobates pygmaeus	Burramyidae	18.0894	30.581	5.2622
Burramys parvus	Burramys parvus	Burramyidae	6.80141	20.2155	-3.63803
Cercartetus concinnus	Cercartetus concinnus	Burramyidae	16.6772	30.5614	5.44201
Cercartetus lepidus	Cercartetus lepidus	Burramyidae	12.0419	23.5489	3.17021
Cercartetus nanus	Cercartetus nanus	Burramyidae	13.1209	25.2822	2.26454
Callithrix geoffroyi	Callithrix geoffroyi	Callitrichidae	23.0871	30.7312	14.8828
Callithrix pygmaea	Callithrix pygmaea	Callitrichidae	25.8461	31.8971	19.5447
Camelus dromedarius	Camelus dromedarius	Camelidae	21.6007	36.8951	5.24954
Alopex lagopus	Vulpes lagopus	Canidae	-4.33143	12.3981	-19.9697
Canis latrans	Canis latrans	Canidae	3.86175	24.7151	-16.5007
Canis lupus	Canis lupus	Canidae	-1.22831	21.7771	-23.3905
Canis mesomelas	Canis mesomelas	Canidae	21.5637	32.1381	9.83938
Cerdocyon thous	Cerdocyon thous	Canidae	23.7491	32.0245	14.9657
Fennecus zerda	Vulpes zerda	Canidae	24.9137	40.7767	8.1155
Vulpes macrotis	Vulpes macrotis	Canidae	14.3326	32.9587	-2.71964
Vulpes vulpes	Vulpes vulpes	Canidae	2.28394	24.088	-18.9232
Wallabia bicolor	Wallabia bicolor	Canidae	17.9367	30.5611	5.11291
Wallabia rufogriseus	Macropus rufogriseus	Canidae	16.4089	28.6725	3.65519
Xerus inauris	Xerus inauris	Canidae	18.837	32.1456	2.58637
Xerus princeps	Xerus princeps	Canidae	19.6255	29.9612	7.22712
Zaedyus pichi	Zaedyus pichiy	Canidae	10.9941	25.5509	-1.39837
Capromys pilorides	Capromys pilorides	Capromyidae	25.0488	32.5901	16.733
Cavia porcellus	Cavia porcellus	Caviidae	15.1457	26.4716	4.57778
Dolichotis salinicola	Dolichotis salinicola	Caviidae	21.9823	34.1762	8.71084
Galea musteloides	Galea musteloides	Caviidae	15.1437	28.6516	1.45377
Kerodon rupestris	Kerodon rupestris	Caviidae	24.4627	32.2968	16.4891
Sarcophilus harrisii	Sarcophilus harrisii	Cebidae	10.1021	19.9479	2.31996
Scalopus aquaticus	Scalopus aquaticus	Cebidae	13.5224	31.6475	-5.14746
Cercopithecus mitis	Cercopithecus mitis	Cercopithecidae	22.222	30.6427	12.9127
Colobus guereza	Colobus guereza	Cercopithecidae	23.2866	31.8892	15.29
Erythrocebus patas	Erythrocebus patas	Cercopithecidae	26.7805	37.7256	15.3359
Alces alces	Alces alces	Cervidae	0.407486	21.8165	-19.7814
Cheirogaleus medius	Cheirogaleus medius	Cheirogaleidae	24.923	33.4731	13.8939
Microcebus murinus	Microcebus murinus	Cheirogaleidae	25.0927	33.5865	13.8631
Microdipodops megacephalus	Microdipodops megacephalus	Cheirogaleidae	7.9667	30.2615	-9.17697
Microdipodops pallidus	Microdipodops pallidus	Cheirogaleidae	9.87826	31.8112	-7.92598
Microgale cowani	Microgale cowani	Cheirogaleidae	20.3521	28.2583	11.6913
Microgale dobsoni	Microgale dobsoni	Cheirogaleidae	20.6932	28.4853	11.9945
Microgale drouhardi	Microgale drouhardi	Cheirogaleidae	20.1926	28.1601	11.338
Microgale talazaci	Microgale talazaci	Cheirogaleidae	20.3362	28.2296	11.7043
Micromys minutus	Micromys minutus	Cheirogaleidae	4.6561	24.9818	-15.5749
Microtus agrestis	Microtus agrestis	Cheirogaleidae	1.10394	22.079	-18.3517
Microtus arvalis	Microtus arvalis	Cheirogaleidae	5.42149	24.1814	-12.0398
Microtus brandti	Lasiopodomys brandtii	Cheirogaleidae	0.544825	25.2442	-26.1302
Microtus breweri	Microtus breweri	Cheirogaleidae	9.9	24.7	-4.9
Chinchilla lanigera	Chinchilla lanigera	Chinchillidae	12.3527	22.8429	2.925
Cabassous centralis	Cabassous centralis	Chlamyphoridae	24.9777	31.3695	18.9206
Chaetophractus nationi	Chaetophractus nationi	Chlamyphoridae	7.6645	18.8286	-6.45145
Chaetophractus vellerosus	Chaetophractus vellerosus	Chlamyphoridae	20.375	33.5145	6.96286
Chaetophractus villosus	Chaetophractus villosus	Chlamyphoridae	15.1994	29.1735	2.51891
Euphractus sexcinctus	Euphractus sexcinctus	Chlamyphoridae	23.3132	32.1335	13.9823
Chrysochloris asiatica	Chrysochloris asiatica	Chrysochloridae	17.0003	28.7098	6.30716
Akodon azarae	Akodon azarae	Cricetidae	17.2249	31.2778	5.2568
Arborimus longicaudus	Arborimus longicaudus	Cricetidae	9.83262	24.8824	-0.17463
Arvicola amphibius	Arvicola amphibius	Cricetidae	1.69932	23.5984	-18.655
Auliscomys boliviensis	Auliscomys boliviensis	Cricetidae	8.11113	18.3868	-5.08389
Auliscomys micropus	Loxodontomys micropus	Cricetidae	7.59187	20.1844	-2.18359
Baiomys taylori	Baiomys taylori	Cricetidae	19.0981	33.5892	3.36551
Calomys callosus	Calomys callosus	Cricetidae	23.7861	32.3852	13.9409
Calomys ducilla	Calomys lepidus	Cricetidae	7.65632	18.5092	-6.07864
Calomys musculinus	Calomys musculinus	Cricetidae	15.1028	29.3388	1.83589
Calomys venustus	Calomys venustus	Cricetidae	16.8913	31.1552	3.27123
Chelemys macronyx	Chelemys macronyx	Cricetidae	7.68115	20.7961	-2.16501
Clethrionomys californicus	Myodes californicus	Cricetidae	9.16271	26.7443	-2.8083
Clethrionomys gapperi	Myodes gapperi	Cricetidae	0.816367	22.5217	-21.4357
Cricetulus barabensis	Cricetulus barabensis	Cricetidae	2.34553	25.7903	-23.2523
Cricetulus migratorius	Cricetulus migratorius	Cricetidae	7.84437	28.929	-12.0918
Cricetus cricetus	Cricetus cricetus	Cricetidae	4.82042	26.2679	-15.4104
Dicrostonyx groenlandicus	Dicrostonyx groenlandicus	Cricetidae	-13.5629	10.0937	-34.5087
Eligmodontia typus	Eligmodontia typus	Cricetidae	12.1581	26.8524	-0.58667
Graomys griseoflavus	Graomys griseoflavus	Cricetidae	18.0064	31.3667	4.90625
Isthmomys pirrensis	Isthmomys pirrensis	Cricetidae	24.4367	29.8706	19.7125
Lemmus lemmus	Lemmus lemmus	Cricetidae	0.193625	16.218	-14.062
Lemmus sibericus	lemmus sibiricus	Cricetidae	-11.9181	14.7618	-35.0152
Lemmus trimucronatus	Lemmus trimucronatus	Cricetidae	-9.5672	14.3194	-31.2603
Lemniscomys griselda	Lemniscomys griselda	Cricetidae	20.8563	30.6818	8.65263
Lemniscomys rosalia	Lemniscomys rosalia	Cricetidae	21.5706	32.1369	8.46977
Lutra lutra	Lutra lutra	Cricetidae	4.62103	24.8746	-15.1606
Megadontomys thomasi	Megadontomys thomasi	Cricetidae	16.7286	24.7286	9.63571
Melomys lutillus	Melomys lutillus	Cricetidae	25.7202	31.0513	20.7778
Microtus californicus	Microtus californicus	Cricetidae	13.6061	31.013	0.545192
Microtus guentheri	Microtus guentheri	Cricetidae	12.3011	29.6374	-2.09331
Microtus longicaudus	Microtus longicaudus	Cricetidae	1.96847	23.305	-16.8671
Microtus mexicanus	Microtus mexicanus	Cricetidae	14.7217	30.1198	-0.70042
Microtus montanus	Microtus montanus	Cricetidae	6.03514	27.4852	-10.9821
Microtus ochrogaster	Microtus ochrogaster	Cricetidae	7.72308	29.1385	-13.9172
Microtus oeconomus	Microtus oeconomus	Cricetidae	-4.97294	20.0191	-28.2235
Microtus pennsylvanicus	Microtus pennsylvanicus	Cricetidae	-0.72613	21.6947	-23.1774
Microtus pinetorum	Microtus pinetorum	Cricetidae	12.6596	30.6536	-5.7811
Microtus richardsoni	Microtus richardsoni	Cricetidae	3.87289	24.281	-12.271
Microtus xanthognathus	Microtus xanthognathus	Cricetidae	-5.84265	19.4661	-30.6668
Miniopterus australis	Miniopterus australis	Cricetidae	24.1687	30.4073	17.7036
Mustela vison	Neovison vison	Cricetidae	0.964294	22.7565	-20.5741
Myodes rufocanus	Myodes rufocanus	Cricetidae	-5.29818	20.8544	-30.4312
Myopus schisticolor	Myopus schisticolor	Cricetidae	-5.63796	21.3175	-31.5969
Neofiber alleni	Neofiber alleni	Cricetidae	21.677	32.8805	8.49137
Neotoma lepida	Neotoma lepida	Cricetidae	12.8124	33.0038	-3.73429
Ochrotomys nuttalli	Ochrotomys nuttalli	Cricetidae	15.846	32.0585	-1.26356
Oligoryzomys longicaudatus	Oligoryzomys longicaudatus	Cricetidae	9.57578	21.447	0.243883
Ondatra zibethicus	Ondatra zibethicus	Cricetidae	1.96276	23.5482	-19.445
Onychomys torridus	Onychomys torridus	Cricetidae	16.5607	35.3844	-0.04039
Oreamnos americanus	Oreamnos americanus	Cricetidae	-0.30919	18.0369	-16.6349
Ornithorhynchus anatinus	Ornithorhynchus anatinus	Cricetidae	16.4723	28.6823	4.17083
Oxymycterus roberti	Oxymycterus roberti	Cricetidae	22.6858	30.4722	12.9936
Panthera leo	Panthera leo	Cricetidae	23.8445	33.8335	12.8756
Panthera tigris	Panthera tigris	Cricetidae	16.6539	28.9651	2.26378
Papio anubis	Papio anubis	Cricetidae	25.4463	35.5345	15.3745
Papio hamadryas	Papio hamadryas	Cricetidae	23.7074	33.9135	13.3729
Papio ursinus	Papio ursinus	Cricetidae	19.5365	31.3289	5.19274
Peromyscus californicus	Peromyscus californicus	Cricetidae	14.3527	30.3741	1.60261
Peromyscus crinitus	Peromyscus crinitus	Cricetidae	10.6739	32.2414	-6.85136
Peromyscus eremicus	Peromyscus eremicus	Cricetidae	18.5774	35.033	1.96093
Peromyscus gossypinus	Peromyscus gossypinus	Cricetidae	17.4123	32.8342	0.889183
Peromyscus keeni	Peromyscus keeni	Cricetidae	4.59003	17.0867	-5.54102
Peromyscus leucopus	Peromyscus leucopus	Cricetidae	12.2913	30.9701	-6.71506
Peromyscus maniculatus	Peromyscus maniculatus	Cricetidae	5.31109	25.8993	-15.1786
Peromyscus polionotus	Peromyscus polionotus	Cricetidae	17.7504	32.5617	1.72973
Peromyscus truei	Peromyscus truei	Cricetidae	10.0006	30.6215	-7.70137
Phenacomys intermedius	Phenacomys intermedius	Cricetidae	4.91592	24.1478	-10.978
Phyllotis (darwini) darwini	Phyllotis darwini	Cricetidae	13.3726	25.1653	3.7424
Phyllotis xanthopygus	Phyllotis xanthopygus	Cricetidae	8.14399	20.4403	-4.22131
Rhabdomys pumilio	Rhabdomys pumilio	Cricetidae	18.96	30.6047	4.81652
Rhinolophus ferrumequinum	Rhinolophus ferrumequinum	Cricetidae	12.3376	29.0561	-3.44239
Rhinolophus hipposideros	Rhinolophus hipposideros	Cricetidae	11.5812	27.9463	-2.54242
Rhinonicteris aurantia	Rhinonicteris aurantia	Cricetidae	26.7832	37.2044	13.8537
Ctenomys australis	Ctenomys australis	Ctenomyidae	14.0178	27.8411	3.47383
Ctenomys fulvus	Ctenomys fulvus	Ctenomyidae	6.08201	16.8432	-6.49225
Ctenomys maulinus	Ctenomys maulinus	Ctenomyidae	7.86148	22.6968	-1.62141
Ctenomys opimus	Ctenomys opimus	Ctenomyidae	6.69976	18.199	-7.53894
Ctenomys peruanus	Ctenomys peruanus	Ctenomyidae	4.99547	14.4528	-7.2883
Ctenomys talarum	Ctenomys talarum	Ctenomyidae	14.6565	29.3704	3.02048
Octodontomys gliroides	Octodontomys gliroides	Ctenomyidae	8.24741	19.5978	-5.98525
Agouti paca	Cuniculus paca	Cuniculidae	24.7029	32.0763	17.0904
Cyclopes didactylus	Cyclopes didactylus	Cyclopedidae	25.6113	32.2511	19.2192
Dasypus novemcinctus	Dasypus novemcinctus	Dasypodidae	22.7954	32.1633	13.1116
Priodontes maximus	Priodontes maximus	Dasypodidae	25.3803	32.6751	17.8724
Tonatia bidens	Tonatia bidens	Dasypodidae	22.8238	31.1284	13.1869
Zaglossus bruijni	Zaglossus bruijni	Dasypodidae	24.9249	29.418	20.9432
Dasyprocta acouchy	Myoprocta acouchy	Dasyproctidae	26.2776	32.6287	21.2953
Dasyprocta azarae	Dasyprocta azarae	Dasyproctidae	21.6683	30.8272	11.4318
Dasyprocta leporina	Dasyprocta leporina	Dasyproctidae	26.0947	32.4218	20.7406
Dasyprocta prymnolopha	Dasyprocta prymnolopha	Dasyproctidae	24.8568	32.3369	17.3685
Antechinomys laniger	Antechinomys laniger	Dasyuridae	21.5974	37.0197	5.69791
Antechinus flavipes	Antechinus flavipes	Dasyuridae	17.8388	31.2165	4.37056
Antechinus stuartii	Antechinus stuartii	Dasyuridae	15.4501	26.9355	3.17798
Antechinus swainsonii	Antechinus swainsonii	Dasyuridae	13.0149	24.8903	2.09723
Dasycercus cristicauda	Dasycercus cristicauda	Dasyuridae	22.1613	38.2225	5.4
Dasyuroides byrnei	Dasyuroides byrnei	Dasyuridae	23.1928	38.2574	6.91861
Dasyurus geoffroii	Dasyurus geoffroii	Dasyuridae	16.3848	30.7675	5.46272
Dasyurus hallucatus	Dasyurus hallucatus	Dasyuridae	25.3886	36.0354	12.7423
Dasyurus maculatus	Dasyurus maculatus	Dasyuridae	14.3309	26.2942	2.89513
Dasyurus viverrinus	Dasyurus viverrinus	Dasyuridae	10.0886	19.9461	2.30315
Ningaui yvonnae	Ningaui yvonnae	Dasyuridae	17.3004	32.4668	4.42997
Planigale gilesi	Planigale gilesi	Dasyuridae	20.5189	35.9468	5.09105
Planigale maculata	Planigale maculata	Dasyuridae	23.5528	34.0738	10.5818
Planigale tenuirostris	Planigale tenuirostris	Dasyuridae	20.8836	35.7832	5.33267
Sminthopsis (laripinta) macroura	Sminthopsis macroura	Dasyuridae	23.0958	37.3413	7.3483
Sminthopsis murina	Sminthopsis murina	Dasyuridae	18.1321	31.5385	4.6897
Sorex alpinus	Sorex alpinus	Dasyuridae	6.53512	21.2289	-6.76711
Globicephala macrorhynchus	Globicephala macrorhynchus	Delphinidae	18.8723	29.7457	7.63457
Tympanoctomys barrerae	Tympanoctomys barrerae	Delphinidae	15.8657	32.4222	0.081797
Chironectes (panamensis)	Chironectes minimus	Didelphidae	23.695	30.8432	16.4316
Didelphis marsupialis	Didelphis marsupialis	Didelphidae	24.6458	31.5132	17.8931
Didelphis virginiana	Didelphis virginiana	Didelphidae	15.8229	31.5792	-0.15024
Gracilinanus microtarsus	Gracilinanus microtarsus	Didelphidae	19.0963	27.9972	8.93305
Lutreolina crassicaudata	Lutreolina crassicaudata	Didelphidae	20.1426	30.7587	10.0507
Marmosa lepida	Marmosa lepida	Didelphidae	25.8821	32.2059	19.8407
Marmosa robinsoni	Marmosa robinsoni	Didelphidae	25.2209	31.8258	18.9907
Marmota caligata	Marmota caligata	Didelphidae	-4.20063	17.8485	-24.4491
Marmota flaviventris	Marmota flaviventris	Didelphidae	6.25107	28.1137	-11.7568
Marmota monax	Marmota monax	Didelphidae	2.04873	23.5667	-20.6559
Metachirus nudicaudatus	Metachirus nudicaudatus	Didelphidae	24.565	31.661	17.2401
Micaelamys namaquensis	Micaelamys namaquensis	Didelphidae	19.3013	31.1667	4.88664
Monodelphis brevicaudata	Monodelphis brevicaudata	Didelphidae	26.0095	32.29	20.7296
Monodelphis domestica	Monodelphis domestica	Didelphidae	24.1213	32.4081	14.6026
Philander opossum	Philander opossum	Didelphidae	25.2805	32.2384	18.2707
Tolypeutes matacus	Tolypeutes matacus	Didelphidae	22.4639	33.9032	10.2023
Dipus sagitta	Dipus sagitta	Dipodidae	8.63099	31.4994	-15.2647
Jaculus jaculus	Jaculus jaculus	Dipodidae	23.1211	38.7786	7.11297
Jaculus orientalis	Jaculus orientalis	Dipodidae	16.256	32.2553	3.3131
Napaeozapus insignis	Napaeozapus insignis	Dipodidae	3.41141	24.0249	-18.3889
Proechimys semispinosus	Proechimys semispinosus	Echimyidae	25.1092	30.8303	19.8278
Proteles cristata	Proteles cristata	Echimyidae	21.5777	32.4087	9.31515
Pseudantechinus macdonnellensis	Pseudantechinus macdonnellensis	Echimyidae	22.5605	37.4934	5.94634
Thylamys elegans	Thylamys elegans	Echimyidae	13.073	25.475	3.92261
Elephas (indicus) maximus	Elephas maximus	Elephantidae	24.2262	32.2246	14.584
Peropteryx macrotis	Peropteryx macrotis	Emballonuridae	24.8509	32.0281	17.4785
Saccostomus campestris	Saccostomus campestris	Emballonuridae	21.0876	31.9352	7.74336
Coendou prehensilis	Coendou prehensilis	Erethizontidae	24.9942	32.3475	17.3411
Erethizon dorsata	Erethizon dorsatum	Erethizontidae	1.24157	23.2525	-20.4656
Atelerix albiventris	Atelerix albiventris	Erinaceidae	25.8792	36.0408	15.664
Echinosorex gymnura	Echinosorex gymnura	Erinaceidae	25.5608	30.6287	20.8609
Erinaceus concolor	Erinaceus concolor	Erinaceidae	11.7059	30.1419	-3.86662
Erinaceus europaeus	Erinaceus europaeus	Erinaceidae	7.18605	22.2787	-5.70954
Acinonyx jubatus	Acinonyx jubatus	Felidae	22.9209	35.7323	7.83968
Felis pardalis	Leopardus pardalis	Felidae	23.9154	31.61	15.8901
Felis serval	Leptailurus serval	Felidae	23.5055	33.2678	12.8977
Felis wiedii	Leopardus wiedii	Felidae	24.5457	32.0128	16.7735
Herpestes javanicus	Herpestes javanicus	Felidae	22.2433	35.7735	7.53674
Lynx rufus	Lynx rufus	Felidae	10.8221	29.7904	-7.33153
Macaca fuscata	Macaca fuscata	Felidae	12.332	28.1991	-2.79249
Macacus mulatta	Macaca mulatta	Felidae	19.1988	32.537	3.90662
Geomys bursaris	Geomys bursarius	Geomyidae	10.4684	31.4386	-10.9947
Geomys pinetis	Geomys pinetis	Geomyidae	19.1652	32.97	3.7547
Thomomys talpoides	Thomomys talpoides	Geomyidae	4.71755	26.9159	-15.2881
Thomomys umbrinus	Thomomys umbrinus	Geomyidae	17.6592	31.2615	3.2843
Thrichomys apereoides	Thrichomys apereoides	Geomyidae	24.2521	32.0652	15.9576
Giraffa camelopardalis	Giraffa camelopardalis	Giraffidae	23.0074	33.5041	11.2957
Eliomys quercinus	Eliomys quercinus	Gliridae	8.82708	24.4435	-4.4237
Glis (Myoxus) glis	Glis glis	Gliridae	8.58218	24.4811	-5.59342
Galerella sanguinea	Galerella sanguinea	Herpestidae	21.4478	31.1615	10.6033
Sus scrofa	Sus scrofa	Herpestidae	11.1085	29.1659	-6.8937
Syconycteris australis	Syconycteris australis	Herpestidae	23.929	29.8084	18.0805
Chaetodipus baileyi	Chaetodipus baileyi	Heteromyidae	20.0756	37.1281	3.40233
Chaetodipus californicus	Chaetodipus californicus	Heteromyidae	14.4776	30.6991	1.72394
Chaetodipus fallax	Chaetodipus fallax	Heteromyidae	17.5305	32.2108	5.10729
Chaetodipus hispidus	Chaetodipus hispidus	Heteromyidae	14.6798	33.0632	-3.93408
Chaetodipus intermedius	Chaetodipus intermedius	Heteromyidae	16.2841	34.8712	-1.46181
Chaetodipus penicillatus	Chaetodipus penicillatus	Heteromyidae	19.3188	37.2424	2.54656
Dipodomys agilis	Dipodomys agilis	Heteromyidae	13.9162	30.4678	0.812523
Dipodomys deserti	Dipodomys deserti	Heteromyidae	17.8283	37.3298	0.715991
Dipodomys merriami	Dipodomys merriami	Heteromyidae	17.9223	34.8367	1.40334
Dipodomys microps	Dipodomys microps	Heteromyidae	9.6977	31.8292	-7.78399
Dipodomys ordii	Dipodomys ordii	Heteromyidae	11.1546	31.3431	-7.44184
Dipodomys panamintinus	Dipodomys panamintinus	Heteromyidae	10.7076	30.0277	-4.53502
Dipodomys spectabilis	Dipodomys spectabilis	Heteromyidae	14.9869	33.1115	-2.94266
Heteromys anomalus	Heteromys anomalus	Heteromyidae	25.3807	31.6162	19.163
Heteromys desmarestianus	Heteromys desmarestianus	Heteromyidae	23.5094	30.9058	16.2623
Hippopotamus amphibius	Hippopotamus amphibius	Heteromyidae	23.9236	33.2771	13.8063
Liomys irroratus	Liomys irroratus	Heteromyidae	19.238	31.0945	6.39504
Liomys salvani	Liomys salvini	Heteromyidae	23.5522	31.3953	16.0845
Loris tardigradus	Loris tardigradus	Heteromyidae	24.7146	30.6293	19.3219
Loxodonta africana	Loxodonta africana	Heteromyidae	24.0351	33.2685	13.9852
Hipposideros cervinus	Hipposideros cervinus	Hipposideridae	24.8981	30.0406	20.1044
Hipposideros diadema	Hipposideros diadema	Hipposideridae	25.037	30.9143	19.244
Hipposideros galeritus	Hipposideros galeritus	Hipposideridae	25.6348	32.4006	18.7258
Hipposideros maggietaylorae	Hipposideros maggietaylorae	Hipposideridae	25.8548	31.1828	21.0214
Hydrochaeris hydrochaeris	Hydrochoerus hydrochaeris	Hydrochaeridae	24.4002	32.1955	16.4236
Hydromys chrysogaster	Hydromys chrysogaster	Hydrochaeridae	21.4453	32.8453	9.43018
Hylomys suillus	Hylomys suillus	Hydrochaeridae	23.6664	31.4767	14.3318
Hystrix africaeaustralis	Hystrix africaeaustralis	Hystricidae	20.9248	31.2848	8.48693
Ichneumia albicauda	Ichneumia albicauda	Hystricidae	24.0673	34.1473	13.1848
Isoodon auratus	Isoodon auratus	Hystricidae	27.3299	34.3953	17.6241
Isoodon macrourus	Isoodon macrourus	Hystricidae	22.902	33.1207	10.7201
Eulemur fulvus	Eulemur fulvus	Lemuridae	22.2192	30.1379	13.2747
Brachylagus idahoensis	Brachylagus idahoensis	Leporidae	7.52346	30.0773	-9.88922
Lepus alleni	Lepus alleni	Leporidae	21.6587	36.5977	6.04294
Lepus americanus	Lepus americanus	Leporidae	-1.47887	20.8338	-23.7847
Lepus arcticus	Lepus arcticus	Leporidae	-14.0127	8.83462	-34.3981
Lepus californicus	Lepus californicus	Leporidae	13.5592	32.344	-3.88759
Lepus timidus	Lepus timidus	Leporidae	-5.10714	20.2573	-28.9395
Lepus townsendii	Lepus townsendii	Leporidae	5.35064	27.6033	-15.286
Sylvilagus floridanus	Sylvilagus floridanus	Leporidae	14.3468	31.131	-2.7336
Syncerus caffer	Syncerus caffer	Leporidae	23.4847	32.4141	14.3319
Tachyglossus aculeatus	Tachyglossus aculeatus	Leporidae	21.5051	35.1057	7.26768
Nycticebus pygmaeus	Nycticebus pygmaeus	Lorisidae	22.5075	30.6589	12.4547
Perodicticus potto	Perodicticus potto	Lorisidae	24.428	31.2858	17.8325
Perognathus alticola	Perognathus alticolus	Lorisidae	12.0542	29.1169	-0.30339
Perognathus flavus	Perognathus flavus	Lorisidae	13.6611	31.9155	-4.16663
Perognathus longimembris	Perognathus longimembris	Lorisidae	12.8031	33.4986	-3.88113
Peromyscus boylii	Peromyscus boylii	Lorisidae	11.2491	31.348	-6.87608
Dendrolagus matschiei	Dendrolagus matschiei	Macropodidae	19.197	25.169	13.615
Lagorchestes conspicillatus	Lagorchestes conspicillatus	Macropodidae	25.5802	36.8327	11.5501
Lagostomus maximus	Lagostomus maximus	Macropodidae	17.9136	32.202	4.43923
Lagurus curtatus	Lemmiscus curtatus	Macropodidae	5.96118	28.2724	-12.9278
Lama glama	Lama glama	Macropodidae	9.02734	20.2212	-1.11108
Macropus giganteus	Macropus giganteus	Macropodidae	19.1364	32.6071	5.26801
Macropus parryi (Wallabia elegans)	Macropus parryi	Macropodidae	20.5227	31.6219	6.88437
Macropus robustus	Macropus robustus	Macropodidae	22.287	36.0954	7.39915
Macropus rufus	Macropus rufus	Macropodidae	22.1772	36.6461	6.79463
Sicista betulina	Sicista betulina	Macropodidae	0.435662	22.6683	-20.5774
Sigmodon hispidus	Sigmodon hispidus	Macropodidae	16.5004	33.4646	-1.34951
Sminthopsis crassicaudata	Sminthopsis crassicaudata	Macropodidae	19.8615	34.8455	5.19802
Elephantulus brachyrhynchus	Elephantulus brachyrhynchus	Macroscelididae	21.4983	31.3979	9.55087
Elephantulus edwardii	Elephantulus edwardii	Macroscelididae	15.9725	29.3732	2.87516
Elephantulus intufi	Elephantulus intufi	Macroscelididae	20.2254	32.0645	5.04193
Elephantulus myurus	Elephantulus myurus	Macroscelididae	19.1194	30.4118	4.58853
Elephantulus rozeti	Elephantulus rozeti	Macroscelididae	17.3489	34.4738	3.22519
Elephantulus rufescens	Elephantulus rufescens	Macroscelididae	23.6787	32.5175	15.4066
Macroscelides proboscideus	Macroscelides proboscideus	Macroscelididae	17.3238	30.5242	3.39619
Macroderma gigas	Macroderma gigas	Megadermatidae	25.8136	36.4848	12.8586
Choloepus hoffmanni	Choloepus hoffmanni	Megalonychidae	25.3427	32.0086	18.2385
Steatomys pratensis	Steatomys pratensis	Mephitidae	21.8865	31.9429	9.95982
Eumops perotis	Eumops perotis	Molossidae	23.414	32.6141	13.7299
Molossus molossus	Molossus molossus	Molossidae	23.742	31.6848	15.5621
Tamandua mexicana	Tamandua mexicana	Molossidae	24.1741	31.6129	16.7922
Mormoops blainvillei	Mormoops blainvillei	Mormoopidae	24.5393	31.76	16.6268
Mormoops megalophylla	Mormoops megalophylla	Mormoopidae	21.4685	32.0082	10.5567
Muntiacus (Cervulus) muntjac	Muntiacus muntjak	Mormoopidae	25.4922	30.599	20.6992
Pteronotus parnellii	Pteronotus parnellii	Mormoopidae	24.7712	32.2793	17.0693
Pteronotus personatus	Pteronotus personatus	Mormoopidae	24.4381	32.2251	16.3987
Pteronotus quadridens	Pteronotus quadridens	Mormoopidae	24.539	31.7601	16.6261
Pteropus giganteus	Pteropus giganteus	Mormoopidae	24.9238	37.6601	10.6709
Pteropus hypomelanus	Pteropus hypomelanus	Mormoopidae	24.8683	30.4245	19.7333
Pteropus poliocephalus	Pteropus poliocephalus	Mormoopidae	16.2055	27.4394	4.22121
Abrothrix andinus	Abrothrix andinus	Muridae	6.54022	17.6781	-6.63125
Abrothrix longipilis	Abrothrix longipilis	Muridae	8.11496	20.9671	-2.02934
Abrothrix olivaceus	Abrothrix olivaceus	Muridae	9.06236	21.3417	-0.91992
Acomys cahirinus	Acomys cahirinus	Muridae	23.1705	38.4306	7.10394
Acomys russatus	Acomys russatus	Muridae	22.7382	35.5635	9.03116
Apodemus agrarius	Apodemus agrarius	Muridae	5.44031	25.5567	-14.6076
Apodemus flavicollis	Apodemus flavicollis	Muridae	7.40658	24.1481	-7.63028
Apodemus hermonensis	Apodemus witherbyi	Muridae	10.7118	28.9112	-5.00539
Apodemus mystacinus	Apodemus mystacinus	Muridae	11.1455	28.7618	-3.70193
Apodemus speciosus	Apodemus speciosus	Muridae	10.4756	27.0237	-5.4592
Apodemus sylvaticus	Apodemus sylvaticus	Muridae	9.29399	23.9126	-3.22827
Desmodillus auricularis	Desmodillus auricularis	Muridae	18.8791	31.7017	3.56809
Dipodillus dasyurus	Dipodillus dasyurus	Muridae	20.2476	34.2048	6.80238
Gerbilliscus afra	Gerbilliscus afra	Muridae	16.6217	29.504	4.56657
Gerbilliscus leucogaster	Gerbilliscus leucogaster	Muridae	21.3599	31.7559	8.47952
Gerbillurus paeba	Gerbillurus paeba	Muridae	19.3175	31.8287	4.27554
Gerbillurus setzeri	Gerbillurus setzeri	Muridae	18.7456	25.7127	10.3594
Gerbillurus tytonis	Gerbillurus tytonis	Muridae	16.7297	25.1604	7.45613
Gerbillurus vallinus	Gerbillurus vallinus	Muridae	18.6283	32.8963	3.17801
Gerbillus andersoni	Gerbillus andersoni	Muridae	19.6682	31.5821	6.9072
Gerbillus gerbillus	Gerbillus gerbillus	Muridae	24.5673	40.3081	7.96873
Gerbillus nanus	Gerbillus nanus	Muridae	24.4429	40.5998	7.76809
Gerbillus pusillus	Gerbillus pusillus	Muridae	24.995	34.1261	16.3351
Gerbillus pyramidum	Gerbillus pyramidum	Muridae	25.9216	39.5317	10.3163
Meriones unguiculatus	Meriones unguiculatus	Muridae	1.07821	24.9902	-24.7543
Mesocricetus auratus	Mesocricetus auratus	Muridae	17.1502	36.8393	1.004
Mesocricetus brandti	Mesocricetus brandti	Muridae	9.32004	28.5333	-7.06671
Mus macedonicus	Mus macedonicus	Muridae	12.1992	30.3197	-2.99619
Mus minutoides	Mus minutoides	Muridae	21.817	30.9506	11.9453
Mus musculus	Mus musculus	Muridae	10.5977	28.1678	-6.89689
Muscardenis avellanarius	Muscardinus avellanarius	Muridae	8.17893	23.6927	-5.70298
Mustela erminea	Mustela erminea	Muridae	-4.22126	18.8882	-26.0947
Mustela frenata	Mustela frenata	Muridae	12.1263	29.3957	-4.58078
Mustela furo	Mustela putorius	Muridae	6.65774	23.5017	-8.44351
Mustela rixosa	Mustela nivalis	Muridae	-1.72405	21.7035	-24.109
Myocastor (Myopotamus) coypus	Myocastor coypus	Muridae	15.8706	28.8624	4.04475
Notomys alexis	Notomys alexis	Muridae	22.4342	37.5079	6.57871
Notomys cervinus	Notomys cervinus	Muridae	23.3287	38.3903	6.96418
Notoryctes caurinus	Notoryctes caurinus	Muridae	25.9266	38.8863	10.0038
Nycticebus coucang	Nycticebus coucang	Muridae	25.5681	31.1158	20.3657
Otomys irroratus	Otomys irroratus	Muridae	16.2095	27.0335	2.93458
Ovis aries	Ovis aries	Muridae	13.3503	28.4092	0.963564
Pteronotus davyi	Pteronotus davyi	Muridae	24.2137	31.9465	16.7401
Rattus (conatus) sordidus	Rattus sordidus	Muridae	24.9383	32.7702	16.013
Rattus lutreolis	Rattus lutreolus	Muridae	14.1907	24.7857	4.03665
Rattus norvegicus	Rattus norvegicus	Muridae	5.4977	24.0889	-11.8658
Rattus rattus	Rattus rattus	Muridae	17.729	31.0658	4.34111
Rattus villosissimus	Rattus villosissimus	Muridae	23.8873	37.5781	8.20514
Reithrodon auritus	Reithrodon auritus	Muridae	11.201	25.2743	-0.41025
Reithrodontomys megalotis	Reithrodontomys megalotis	Muridae	11.192	30.8707	-7.0109
Thomomys bottae	Thomomys bottae	Muridae	14.3501	32.9803	-2.2588
Eira barbara	Eira barbara	Mustelidae	24.4142	31.9755	16.5871
Enhydra lutris	Enhydra lutris	Mustelidae	9.40592	20.5426	-0.56506
Galictis (barbara) cuja	Galictis cuja	Mustelidae	16.7893	29.2556	4.65231
Galictis vittata	Galictis vittata	Mustelidae	25.5925	32.6092	18.7318
Martes americana	Martes americana	Mustelidae	-2.57995	20.0596	-25.1773
Mastomys natalensis	Mastomys natalensis	Mustelidae	24.0393	33.3695	13.9889
Mazama rufina	Mazama rufina	Mustelidae	14.8424	20.9079	9.15891
Myrmecobius fasciatus	Myrmecobius fasciatus	Myrmecobiidae	15.9193	30.5664	4.88714
Myrmecophaga tridactyla	Myrmecophaga tridactyla	Myrmecobiidae	24.521	32.2829	16.5665
Tamandua tetradactyla	Tamandua tetradactyla	Myrmecophagidae	24.5894	32.3051	16.6336
Tamias amoenus	Tamias amoenus	Myrmecophagidae	5.24742	25.6158	-10.4753
Tamias merriami	Tamias merriami	Myrmecophagidae	11.8778	28.5116	-0.92861
Nandinia binotata	Nandinia binotata	Nandiniidae	24.0218	31.4689	16.6047
Natalus tumidirostris	Natalus tumidirostris	Natalidae	25.603	32.0941	19.8809
Cricetomys gambianus	Cricetomys gambianus	Nesomyidae	24.3914	34.4152	13.63
Mystromys albicaudatus	Mystromys albicaudatus	Nesomyidae	15.6054	27.8009	1.13318
Saimiri sciureus	Saimiri sciureus	Nesomyidae	25.8686	32.454	19.767
Sturnira erythromos	Sturnira erythromos	Nesomyidae	19.9819	27.6016	11.5413
Noctilio albiventris	Noctilio albiventris	Noctilionidae	24.803	32.1042	17.2826
Noctilio leporinus	Noctilio leporinus	Noctilionidae	24.4365	32.0125	16.6098
Aconaemys fuscus	Aconaemys fuscus	Octodontidae	8.36688	23.0742	-1.08706
Nannospalax leucodon	Spalax leucodon	Octodontidae	10.3317	26.5259	-4.05169
Octodon bridgesi	Octodon bridgesi	Octodontidae	10.6351	25.3911	0.896571
Octodon degus	Octodon degus	Octodontidae	13.476	25.4704	3.67594
Octodon lunatus	Octodon lunatus	Octodontidae	14.4137	26.2774	4.78113
Octomys mimax	Octomys mimax	Octodontidae	14.2958	29.4078	-1.25114
Odobenus rosmarus	Odobenus rosmarus	Octodontidae	-1.0078	14.189	-15.2653
Odocoileus hemionus	Odocoileus hemionus	Octodontidae	6.5252	26.7547	-12.1487
Odocoileus virginianus	Odocoileus virginianus	Octodontidae	11.4762	28.6383	-5.76643
Spalax ehrenbergi	Spalax ehrenbergi	Octodontidae	18.1183	36.7192	2.16995
Uroderma bilobatum	Uroderma bilobatum	Octodontidae	24.5445	31.6914	17.1851
Orycteropus afer	Orycteropus afer	Orycteropodidae	23.8126	33.7351	13.0269
Oryctolagus cuniculus	Oryctolagus cuniculus	Orycteropodidae	15.7886	29.8937	2.65664
Oryx (beisa) gazella	Oryx beisa	Orycteropodidae	25.3773	34.7949	16.7544
Otolemur (Galago) crassicaudatus	Otolemur crassicaudatus	Orycteropodidae	21.9895	31.0918	11.1652
Callorhinus ursinus	Callorhinus ursinus	Otariidae	7.86947	17.9489	-1.33969
Eumetopias jubata	Eumetopias jubatus	Otariidae	6.59112	17.6605	-2.81752
Zapus hudsonicus	Zapus hudsonius	Otariidae	2.10796	23.4816	-19.965
Zapus princeps	Zapus princeps	Otariidae	3.1895	24.0311	-15.6445
Pedetes capensis	Pedetes capensis	Pedetidae	20.349	31.9523	5.68027
Perameles gunni	Perameles gunnii	Pedetidae	10.5697	20.8872	2.16699
Perameles nasuta	Perameles nasuta	Pedetidae	16.9726	28.1591	5.14497
Echymipera (rufescens) australis	Echymipera rufescens	Peramelidae	24.1339	29.6861	18.9211
Echymipera kalubu	Echymipera kalubu	Peramelidae	24.0303	29.4302	19.0302
Isoodon obesulus	Isoodon obesulus	Peramelidae	14.0332	24.9529	5.44469
Macrotis lagotis	Macrotis lagotis	Peramelidae	25.194	38.7882	9.01161
Macrotus californicus	Macrotus californicus	Peramelidae	19.4679	36.0049	3.84849
Petaurus breviceps	Petaurus breviceps	Petauridae	21.2685	31.0695	11.0523
Petaurus norfolcensis	Petaurus norfolcensis	Petauridae	19.2798	31.2703	6.05213
Petrodromus tetradactylus	Petrodromus tetradactylus	Petauridae	22.916	31.3666	13.433
Phalanger carmelitae	Phalanger carmelitae	Phalangeridae	19.5274	25.6829	13.7558
Phalanger gymnotis	Phalanger gymnotis	Phalangeridae	23.2635	28.6402	18.2575
Phalanger intercastellanus	Phalanger intercastellanus	Phalangeridae	24.4191	30.266	19.1023
Phalanger orientalis	Phalanger orientalis	Phalangeridae	23.8611	28.8084	19.1276
Phalanger sericeus	Phalanger sericeus	Phalangeridae	19.5944	25.7302	13.8405
Phascogale tapoatafa	Phascogale tapoatafa	Phalangeridae	17.7107	29.039	6.87079
Spilogale putorius	Spilogale putorius	Phalangeridae	12.7439	31.7077	-6.77807
Phascolarctos cinereus	Phascolarctos cinereus	Phascolarctidae	18.8279	31.4107	5.27298
Erignathus barbatus	Erignathus barbatus	Phocidae	-3.58462	12.7111	-18.8523
Halichoerus grypus	Halichoerus grypus	Phocidae	8.18671	19.3883	-1.51198
Anoura caudifer	Anoura caudifer	Phyllostomidae	23.8056	30.941	16.2887
Anoura latidens	Anoura latidens	Phyllostomidae	20.5271	27.0042	14.1758
Artibeus cinereus	Artibeus cinereus	Phyllostomidae	26.121	32.289	20.5656
Artibeus concolor	Artibeus concolor	Phyllostomidae	25.9535	32.561	19.7865
Artibeus jamaicensis	Artibeus jamaicensis	Phyllostomidae	23.3652	31.1009	15.5534
Artibeus lituratus	Artibeus lituratus	Phyllostomidae	24.2403	31.6823	16.5639
Carollia perspicillata	Carollia perspicillata	Phyllostomidae	24.4182	31.7698	16.857
Choeroniscus godmani	Choeroniscus godmani	Phyllostomidae	24.9815	31.8633	18.7237
Choeroniscus periosus	Choeroniscus periosus	Phyllostomidae	25.173	30.0061	20.7018
Chrotopterus auritus	Chrotopterus auritus	Phyllostomidae	24.5914	32.0434	16.9138
Desmodus rotundus	Desmodus rotundus	Phyllostomidae	22.6062	31.0048	13.8913
Diaemus youngi	Diaemus youngi	Phyllostomidae	24.5802	31.9653	16.906
Diphylla ecaudata	Diphylla ecaudata	Phyllostomidae	23.2016	31.0912	14.5978
Erophylla bombifrons	Erophylla bombifrons	Phyllostomidae	23.9771	31.0243	16.2534
Erophylla sezekorni	Erophylla sezekorni	Phyllostomidae	24.943	32.2608	16.9322
Glossophaga longirostris	Glossophaga longirostris	Phyllostomidae	24.8897	31.2852	19.0386
Glossophaga soricina	Glossophaga soricina	Phyllostomidae	23.9065	31.5019	16.0269
Leptonycteris curasoae	Leptonycteris curasoae	Phyllostomidae	24.7928	31.3575	18.7197
Leptonycteris yerbabuenae	Leptonycteris yerbabuenae	Phyllostomidae	20.5171	32.6739	7.87791
Monophyllus redmani	Monophyllus redmani	Phyllostomidae	24.5491	31.7621	16.6467
Phyllostomus discolor	Phyllostomus discolor	Phyllostomidae	24.8672	31.9666	17.6046
Phyllostomus elongatus	Phyllostomus elongatus	Phyllostomidae	25.1184	32.2228	17.8859
Phyllostomus hastatus	Phyllostomus hastatus	Phyllostomidae	24.6202	31.7443	17.2671
Platyrrhinus lineatus	Platyrrhinus lineatus	Phyllostomidae	21.9511	30.4871	12.4947
Plecotus auritus	Plecotus auritus	Phyllostomidae	7.31569	23.6832	-7.32643
Rousettus aegyptiacus	Rousettus aegyptiacus	Phyllostomidae	21.924	31.2283	12.309
Rousettus amplexicaudatus	Rousettus amplexicaudatus	Phyllostomidae	24.8486	31.1653	18.2537
Sturnira lilium	Sturnira lilium	Phyllostomidae	24.0938	31.9269	16.0413
Suncus etruscus	Suncus etruscus	Phyllostomidae	18.0124	31.2995	5.57059
Suncus murinus	Suncus murinus	Phyllostomidae	23.7274	33.8569	12.472
Suricata suricatta	Suricata suricatta	Phyllostomidae	18.308	31.2482	2.93014
Tragulus javanicus	Tragulus javanicus	Phyllostomidae	24.8644	30.9233	18.6553
Uromys caudimaculatus	Uromys caudimaculatus	Phyllostomidae	24.1734	29.8121	18.791
Ursus americanus	Ursus americanus	Phyllostomidae	-0.94294	21.1168	-22.9963
Ursus arctos	Ursus arctos	Phyllostomidae	-3.57162	20.6994	-26.7598
Ursus maritimus	Ursus maritimus	Phyllostomidae	-12.5557	10.3144	-32.9255
Vespadelus vulturnus	Vespadelus vulturnus	Phyllostomidae	16.7091	30.8273	3.43041
Aepyprymnus rufescens	Aepyprymnus rufescens	Potoroidae	20.6033	31.9661	6.90992
Bettongia gaimardi	Bettongia gaimardi	Potoroidae	10.6093	21.0604	2.02044
Bettongia penicillata	Bettongia penicillata	Potoroidae	16.2005	30.2881	5.89266
Potorous tridactylus	Potorous tridactylus	Potoroidae	14.6635	24.9171	4.25204
Heterohyrax brucei	Heterohyrax brucei	Procaviidae	23.1254	32.564	13.2121
Procavia capensis	Procavia capensis	procaviidae	24.5758	35.8382	12.5572
Bassaris astutus	Bassariscus astutus	Procyonidae	16.0888	32.8178	-0.29751
Bassariscus sumichrasti	Bassariscus sumichrasti	Procyonidae	23.662	31.9437	15.2751
Nasua narica	Nasua narica	Procyonidae	21.2054	32.9978	9.02476
Nasua nasua	Nasua nasua	Procyonidae	24.6712	32.25	16.8016
Potos flavus	Potos flavus	Procyonidae	24.8856	32.0382	17.5621
Procyon cancrivorus	Procyon cancrivorus	Procyonidae	24.4175	32.2691	16.359
Procyon lotor	Procyon lotor	Procyonidae	10.453	29.1281	-8.15476
Petauroides volans	Petauroides volans	Pseudocheiridae	18.0901	29.9247	4.94174
Pseudocheirus peregrinus	Pseudocheirus peregrinus	Pseudocheiridae	16.7335	28.4648	5.05884
Pseudomys gracilicaudatus	Pseudomys gracilicaudatus	Pseudocheiridae	20.5685	31.5101	7.16141
Pseudomys hermannsburgensis	Pseudomys hermannsburgensis	Pseudocheiridae	22.4323	37.4096	6.56359
Cynopterus brachyotis	Cynopterus brachyotis	Pteropodidae	25.1447	32.4049	17.198
Dobsonia anderseni	Dobsonia anderseni	Pteropodidae	24.6559	29.2277	20.4942
Dobsonia minor	Dobsonia minor	Pteropodidae	25.6587	30.9177	20.7902
Dobsonia moluccensis	Dobsonia moluccensis	Pteropodidae	24.0857	29.5073	19.0252
Dobsonia praedatrix	Dobsonia praedatrix	Pteropodidae	24.5952	29.1562	20.4376
Eonycteris spelaea	Eonycteris spelaea	Pteropodidae	24.5938	31.922	16.1384
Felis concolor	Puma concolor	Pteropodidae	18.2097	29.8991	6.94349
Macroglossus minimus	Macroglossus minimus	Pteropodidae	25.2655	31.0954	19.4211
Macropus (major) fuliginosus	Macropus fuliginosus	Pteropodidae	17.9276	32.4676	4.88131
Macropus (Wallabia) agilis	Macropus agilis	Pteropodidae	26.2413	35.5777	14.5031
Macropus (Wallabia) dorsalis	Macropus dorsalis	Pteropodidae	20.3814	32.5392	5.90431
Macropus eugenii	Macropus eugenii	Pteropodidae	15.7396	27.4993	6.81862
Melonycteris melanops	Melonycteris melanops	Pteropodidae	24.6028	29.1661	20.4418
Meriones hurrianae	Meriones hurrianae	Pteropodidae	26.338	41.1564	8.09922
Meriones tristrami	Meriones tristrami	Pteropodidae	12.8245	31.7538	-3.06975
Nyctimene albiventer	Nyctimene albiventer	Pteropodidae	25.3049	30.5321	20.4819
Nyctimene cyclotis	Nyctimene cyclotis	Pteropodidae	18.5358	23.5518	14.2891
Nyctimene major	Nyctimene major	Pteropodidae	25.2947	29.7397	21.1967
Paranyctimene raptor	Paranyctimene raptor	Pteropodidae	23.9433	29.3892	18.9043
Paraxerus (palliatus) ornatus	Paraxerus palliatus	Pteropodidae	23.8866	32.0861	14.7722
Paraxerus cepapi	Paraxerus cepapi	Pteropodidae	21.6434	32.3248	8.48737
Parotomys brantsii	Parotomys brantsii	Pteropodidae	17.6548	32.4298	1.76185
Pltilocerus lowii	Ptilocercus lowii	Pteropodidae	25.4315	30.5532	20.7266
Pteropus pumilus	Pteropus pumilus	Pteropodidae	26.1314	31.53	21.4373
Pteropus rodricensis	Pteropus rodricensis	Pteropodidae	23.8667	28.9667	18.3167
Pteropus scapulatus	Pteropus scapulatus	Pteropodidae	22.511	34.5037	8.90592
Pteropus vampyrus	Pteropus vampyrus	Pteropodidae	25.5734	30.963	20.4211
Puma yagouaroundi; Herpailurus yagouaroundi	Puma yagouaroundi	Pteropodidae	24.101	32.2866	15.772
Rangifer tarandus	Rangifer tarandus	Pteropodidae	-8.75661	17.4761	-33.4047
Raphicerus campestris	Raphicerus campestris	Pteropodidae	19.8792	31.4637	5.7782
Saccopteryx bilineata	Saccopteryx bilineata	Pteropodidae	24.8272	32.0222	17.485
Sylvilagus audubonii	Sylvilagus audubonii	Pteropodidae	13.4548	32.2379	-4.25006
Ceratotherium simum	Ceratotherium simum	Rhinocerotidae	23.2705	34.8317	10.293
Rhinophylla pumilio	Rhinophylla pumilio	Rhinonycteridae	25.2892	32.1174	18.6555
Ammospermophilus leucurus	Ammospermophilus leucurus	Sciuridae	11.2312	32.1129	-6.13102
Cynomys (Citellus) leucurus	Cynomys leucurus	Sciuridae	5.00061	27.553	-14.1367
Cynomys ludovicianus	Cynomys ludovicianus	Sciuridae	10.545	31.5768	-9.60108
Funisciurus congicus	Funisciurus congicus	Sciuridae	23.6374	30.8492	15.1306
Glaucomys volans	Glaucomys volans	Sciuridae	12.6628	30.1046	-5.37894
Spermophilus (Citellus) franklinii	Spermophilus franklinii	Sciuridae	6.08784	28.1326	-17.1307
Spermophilus beldingi	Spermophilus beldingi	Sciuridae	7.07116	28.6518	-8.75857
Spermophilus citellus	Spermophilus citellus	Sciuridae	10.082	26.4074	-4.84033
Spermophilus lateralis	Spermophilus lateralis	Sciuridae	5.56218	26.4565	-11.3055
Spermophilus mohavensis	Spermophilus mohavensis	Sciuridae	16.2543	36.5675	-0.5459
Spermophilus parryi	Spermophilus parryii	Sciuridae	-9.22998	15.6661	-31.8643
Spermophilus richardsoni	Spermophilus richardsonii	Sciuridae	3.53274	26.3118	-19.6936
Spermophilus spilosoma	Spermophilus spilosoma	Sciuridae	14.2709	32.6896	-4.0469
Spermophilus tereticaudus	Spermophilus tereticaudus	Sciuridae	19.8445	38.0632	3.10119
Spermophilus townsendii	Spermophilus townsendii	Sciuridae	9.73057	29.592	-4.94242
Spermophilus tridecemlineatus	Spermophilus tridecemlineatus	Sciuridae	7.53766	29.0954	-14.0898
Spermophilus undulatus	Spermophilus undulatus	Sciuridae	-3.13357	22.4981	-30.2378
Spilocuscus maculatus	Spilocuscus maculatus	Sciuridae	24.1507	29.6282	19.0367
Tamias minimus	Tamias minimus	Sciuridae	0.463942	23.6093	-22.8709
Tamias striatus	Tamias striatus	Sciuridae	7.57565	27.5752	-13.3358
Tamiasciurus hudsonicus	Tamiasciurus hudsonicus	Sciuridae	-0.45164	21.7513	-22.7586
Tarsipes rostratus	Tarsipes rostratus	Sciuridae	16.7079	30.3187	6.17213
Blarina brevicauda	Blarina brevicauda	Soricidae	6.43528	27.373	-15.2307
Blarina carolinensis	Blarina carolinensis	Soricidae	17.5736	32.7999	1.16473
Crocidura crossei	Crocidura crossei	Soricidae	26.2053	34.2983	18.9836
Crocidura hildegardeae	Crocidura hildegardeae	Soricidae	23.0135	30.6506	15.769
Crocidura jouvenetae	Crocidura jouvenetae	Soricidae	25.7102	32.9712	19.2442
Crocidura luna	Crocidura luna	Soricidae	21.4676	30.5091	11.7821
Crocidura olivieri	Crocidura olivieri	Soricidae	24.5594	34.0791	14.4304
Crocidura poensis	Crocidura poensis	Soricidae	25.6259	33.4525	18.6016
Crocidura russula	Crocidura russula	Soricidae	12.1007	26.8483	0.475045
Crocidura suaveolens	Crocidura suaveolens	Soricidae	7.4853	28.0123	-12.2033
Crocidura viaria	Crocidura viaria	Soricidae	26.311	37.9366	14.107
Cryptotis parva	Cryptotis parva	Soricidae	14.7322	31.727	-2.81064
Neomys anomalus	Neomys anomalus	Soricidae	9.28401	25.0414	-4.52222
Neomys fodiens	Neomys fodiens	Soricidae	2.60986	22.769	-16.7802
Neotoma fuscipes	Neotoma fuscipes	Soricidae	11.2995	29.1439	-1.23167
Notiosorex crawfordi	Notiosorex crawfordi	Soricidae	17.1782	34.28	0.049886
Sorex cinereus	Sorex cinereus	Soricidae	-0.96039	21.3185	-23.0989
Sorex coronatus	Sorex coronatus	Soricidae	9.86949	23.2762	-1.00197
Sorex minutus	Sorex minutus	Soricidae	2.17011	22.635	-16.8729
Sorex palustris	Sorex palustris	Soricidae	1.49861	23.0065	-19.8914
Sorex vagrans	Sorex vagrans	Soricidae	6.40873	25.9547	-8.11213
Spalacopus cyanus	Spalacopus cyanus	Soricidae	13.1198	25.1671	3.39349
Cannomys badius	Cannomys badius	Spalacidae	23.3893	32.563	11.505
Spermophilus armatus	Spermophilus armatus	Spalacidae	3.07464	25.4975	-15.0675
Spermophilus beecheyi	Spermophilus beecheyi	Spalacidae	11.7678	29.3734	-1.17863
Tadarida brasiliensis	Tadarida brasiliensis	Spalacidae	17.5338	30.4504	4.73077
Tachyoryctes splendens	Tachyoryctes splendens	Tachyglossidae	19.4695	28.3964	10.9218
Zalophus californianus	Zalophus californianus	Tachyglossidae	23.1234	32.6605	12.1075
Condylura cristata	Condylura cristata	Talpidae	3.34061	24.152	-18.7758
Neurotrichus gibbsii	Neurotrichus gibbsii	Talpidae	8.74359	24.183	-2.01516
Sciurus carolinensis	Sciurus carolinensis	Talpidae	10.6693	29.5509	-8.96622
Scotinomys teguina	Scotinomys teguina	Talpidae	20.573	28.485	12.7809
Scotinomys xerampelinus	Scotinomys xerampelinus	Talpidae	15.3971	21.0638	9.67325
Sekeetamys calurus	Sekeetamys calurus	Talpidae	21.0846	34.6205	6.86135
Setifer setosus	Setifer setosus	Talpidae	22.8766	31.3422	12.7482
Taurotragus oryx	Taurotragus oryx	Tarsiidae	21.1084	31.5577	8.68435
Taxidea taxus	Taxidea taxus	Tarsiidae	8.6216	28.7108	-10.8179
Tenrec ecaudatus	Tenrec ecaudatus	Tarsiidae	22.8766	31.3422	12.7482
Thallomys paedulcus	Thallomys paedulcus	Tarsiidae	22.2079	32.0065	10.7696
Tarsius syrichta	Tarsius syrichta	Tarsipedidae	25.1726	30.785	19.9657
Dicotyles tajacu	Pecari tajacu	Tayassuidae	23.9132	32.334	15.2533
Geogale aurita	Geogale aurita	Tenrecidae	24.1978	33.6557	12.4964
Setonix brachyurus	Setonix brachyurus	Tenrecidae	15.2914	27.2036	6.53974
Trichechus manatus	Trichechus manatus	Tragulidae	14.7734	24.2719	5.76895
Trichosurus caninus	Trichosurus caninus	Trichechidae	17.602	28.4186	4.96659
Trichosurus fuliginosus (vulpeca)	Trichosurus vulpecula	Trichechidae	20.2616	32.5228	7.36364
Tupaia belangeri	Tupaia belangeri	Trichechidae	20.9259	30.2674	8.96477
Tupaia glis	Tupaia glis	Tupaiidae	25.5056	31.0184	20.3241
Tursiops truncatus	Tursiops truncatus	Tupaiidae	18.4076	30.4972	5.23497
Chalinolobus gouldii	Chalinolobus gouldii	Vespertilionidae	21.3702	35.2397	6.86453
Eptesicus fuscus	Eptesicus fuscus	Vespertilionidae	10.4425	28.9196	-7.77334
Histiotus velatus	Histiotus velatus	Vespertilionidae	21.8058	30.2947	12.2647
Lasiurus cinereus	Lasiurus cinereus	Vespertilionidae	9.29887	27.2059	-8.7745
Miniopterus schreibersi	Miniopterus schreibersii	Vespertilionidae	12.3832	28.3586	-0.90588
Mirounga angustirostris	Mirounga angustirostris	Vespertilionidae	13.3767	22.8332	4.86559
Myotis keaysi	Myotis keaysi	Vespertilionidae	22.2741	29.6148	14.6341
Myotis lucifugus	Myotis lucifugus	Vespertilionidae	2.76625	24.0048	-18.3685
Myotis myotis	Myotis myotis	Vespertilionidae	10.2274	25.4581	-2.70568
Myotis oxyotus	Myotis oxyotus	Vespertilionidae	20.7073	27.9267	13.2283
Myotis sodalis	Myotis sodalis	Vespertilionidae	11.6364	30.0917	-7.17262
Myotis thysanodes	Myotis thysanodes	Vespertilionidae	12.5286	30.8833	-3.69339
Myotomys sloggetti	Myotomys sloggetti	Vespertilionidae	9.94615	21.2846	-2.96154
Myotomys unisulcatus	Myotomys unisulcatus	Vespertilionidae	16.3681	29.5383	3.47234
Nyctophilus geoffroyi	Nyctophilus geoffroyi	Vespertilionidae	21.3138	35.2347	6.80502
Nyctophilus gouldi	Nyctophilus gouldi	Vespertilionidae	17.0276	29.702	4.38628
Ochotona collaris	Ochotona collaris	Vespertilionidae	-5.5501	17.7753	-27.4722
Ochotona princeps	Ochotona princeps	Vespertilionidae	3.32547	23.2964	-12.8033
Viverra megaspila	Viverra megaspila	Vespertilionidae	23.2	31.7949	12.7184
Viverricula indica	Viverricula indica	Vespertilionidae	21.5861	33.3802	8.25931
Vulpes cana	Vulpes cana	Vespertilionidae	18.6916	35.9541	1.71679
Arctictis binturong	Arctictis binturong	Viverridae	23.939	31.0408	15.4049
Arctogalidia trivirgata	Arctogalidia trivirgata	Viverridae	24.2416	30.9838	16.4092
Genetta tigrina	Genetta tigrina	Viverridae	16.0845	27.0582	4.27733
Paradoxurus hermaphroditus	Paradoxurus hermaphroditus	Viverridae	24.256	33.7574	13.6968
Paraechinus aethiopicus	Paraechinus aethiopicus	Viverridae	22.9075	38.5358	7.53313
Lasiorhinus latifrons	Lasiorhinus latifrons	Vombatidae	17.5488	30.5891	5.38831
